# Supplementary material for: Determinants of long-term SARS-CoV-2 immune responses in asymptomatic-to- moderate COVID-19 patients in sub-Saharan Africa
Source: Research Square preprint supplement (doi:10.21203/rs.3.rs-7546523/v1), 2025-10-08
Supplement: Supplementary file 1 [file 47a20fdb032b5381ea4374f1.docx]

**Supplementary Material**

**Supplement to: de Rioja VL, Goovaerts O, Vidal M, et al. Determinants of long-term SARS-CoV-2 immune responses in asymptomatic-to-moderate COVID-19 patients in Sub-Saharan Africa**

**Supplemental Texts**

[Suppl. Text S1: SARS-CoV-2 re-infections 1](#_Toc207985874)

[Suppl. Text S2: Extended statistical methods 2](#_Toc207985875)

**Supplemental Figures**

[Figure S 1 Gating strategy for AIM](#_Toc205373964)[+](#_Toc205373964) [T-cells and B-cells analyses. 3](#_Toc205373964)

[Figure S 2 Seropositivity rates of anti-SARS-CoV-2 antibodies across epidemic waves, vaccination status, and study sites. 5](#_Toc205373965)

[Figure S 3 Longitudinal kinetics and estimated half-lives of antibody responses across antigens. 6](#_Toc205373966)

[Figure S 4 Longitudinal kinetics of neutralizing antibody activity against SARS-CoV-2 variants. 7](#_Toc205373967)

[Figure S 5 Longitudinal dynamics of spike-specific and general B cell subsets following SARS-CoV-2 infection. 8](#_Toc205373968)

[Figure S 6 Forest plots showing the effects of clinical and demographic variables on antibody levels across 24 isotype-antigen combinations. 11](#_Toc205373969)

[Figure S 7 Forest plots showing the effects of clinical and demographic variables on neutralizing antibody responses across SARS-CoV-2 variants. 12](#_Toc205373970)

**Supplemental Tables**

[Table S 1 Complete demographic and clinical characteristics of participants included in the immunological analyses. 14](#_Toc205373990)

[Table S 2 Spearman correlations between binding antibody levels and neutralization capacity against Wuhan strain, stratified by isotype, analyte, and time point. 18](#_Toc205373991)

[Table S 3 Logistic regression and non-parametric test results for binding and neutralizing antibody levels and risk of SARS-CoV-2 reinfection. 19](#_Toc205373992)

[Table S 4 Model comparisons assessing treatment effects on binding and neutralizing antibody levels. 21](#_Toc205373993)

[Table S 5 Nonparametric comparisons of antibody, neutralization, and cellular immune responses across treatment arms. 23](#_Toc205373994)

[Table S 6 Mixed model estimates comparing symptomatic and asymptomatic participants for antibody responses across isotypes, analytes, and time points 25](#_Toc205373995)

[Table S 7 Non-parametric comparisons of cellular immune responses across clinical and demographic variables. 27](#_Toc205373996)

## Suppl. Text S1: SARS-CoV-2 re-infections

Saliva samples were collected at M1, M3, M6, and M12 during the follow-up period to assess SARS-CoV-2 viral load and potential reinfections. Re-infections during follow‑up were identified either by a positive RT-qPCR test (genomic and sub-genomic RNA), RDT, or by a > 4-fold increase in antibody signal (mean fluorescence intensity, MFI) between consecutive time points. Samples from re-infected participants were excluded from post-exposure time points, except in the specific analysis focused on reinfection.

For the antibody analysis, we parted from a dataset of 2557 samples from 513 different individuals across multiple time points (D0, D7, D21, M1, M3, M6, and M12), and we made these exclusions: (*i*) 3 samples because no time point was known. (*ii*) 8 samples (from D21 onwards) from 2 participants who were vaccinated between D7-D21. No one was vaccinated one week after enrolling the study. (*iii*) 10 samples (from M1 onwards) from 3 participants who were vaccinated between D21-M1. (*iv*) 34 samples (from M3 onwards) from 13 individuals who vaccinated between M1 and M3. (*v*) 138 samples from 82 individuals re-exposed (71 by fold change (FC)>4, 6 only by vaccination, 5 only by PCR+ at the M6 visit) between M3 and M6. We excluded the samples from these individuals collected from M6 onwards. (*vi*) 44 samples from 44 individuals re-exposed (37 by FC>4, 4 only by vaccination, 3 only by PCR+ at the M12 visit or between M6-M12) between M6 and M12. We excluded the samples from these individuals collected at M12. (*vii*) Only for the analyses of the effect of treatments: 316 samples from 92 participants who did not complete treatment.

We end up with 2004 samples from 421 individuals (all of them symptomatic) for the treatment analysis or with 2320 samples from 513 participants (symptomatic and asymptomatic) for the clinic-demographic analysis.

For the neutralization analysis, we parted from a dataset of 864 samples from 232 different individuals across multiple time points (D0, D21, M3, M6, and M12), and we made these exclusions: (*i*) 2 samples because no time point was known. (*ii*) 3 samples (from D21 onwards) from 1 participant who was vaccinated between D0-D21. (*iii*) 3 samples (from M1 onwards) from 1 participant who was vaccinated between D21-M1. (*iv*) 18 samples (from M3 onwards) from 7 individuals who vaccinated between M1 and M3. (*v*) 89 samples from 53 individuals re-exposed (43 by fold change (FC)>4, 6 only by vaccination, 4 only by PCR+ at the M6 visit) between M3 and M6. We excluded the samples from these individuals collected from M6 onwards. (*vi*) 32 samples from 32 individuals re-exposed (26 by FC>4, 3 only by vaccination, 3 only by PCR+ at the M12 visit or between M6-M12) between M6 and M12. We excluded the samples from these individuals collected at M12. (*vii*) Only for the analyses of the effect of treatments: 86 samples from 30 participants who did not complete treatment.

We end up with 631 samples from 202 individuals (all of them symptomatic) for the treatment analysis or with 717 samples from 232 participants (symptomatic and asymptomatic) for the clinic-demographic analysis.

For the cellular data analysis, we parted from a dataset of 605 samples from 260 different individuals across three time points (D0, D21, and M3), and we made these exclusions: (*i*) 1 sample (from D21 onwards) from 1 participant who was vaccinated between D0-D21. (*ii*) 9 samples (at M3) from 9 participant who were vaccinated between D21-M3. (*iii*) Only for the analyses of the effect of treatments: 62 samples from 30 participants who did not complete treatment.

We end up with 533 samples from 230 individuals (all of them symptomatic) for the treatment analysis or with 595 samples from 260 participants (symptomatic and asymptomatic) for the clinic-demographic analysis. Exclusively for the T-cell AIM flow cytometry analysis the numbers get reduced to 223 samples from 93 individuals for the treatment analysis (Cicle-Nita (N=47, 50.5%) and Paracetamol (N=46, 49.5%)) or with 246 samples from 104 participants for the clinic-demographic analysis. Exclusively for the B-cell flow cytometry analysis the numbers get reduced to 172 samples from 73 individuals for the treatment analysis (Cicle-Nita (N=36, 49.3%) and Paracetamol (N=37, 50.7%)) or with 193 samples from 82 participants for the clinic-demographic analysis.

## Suppl. Text S2: Extended statistical methods

*Model specification and software details*

Multivariable models used linear mixed-effects models (LMM) for log10​(AU) and beta-regression GLMM for percent neutralization, with random intercepts for participants (repeated measures). LMMs were fitted with lme4; neutralization GLMMs with glmmTMB using a logit link.

*Spline knots for antibody kinetics*

Natural cubic splines (using splines library) were placed at biologically times: D21, M1, M3 for binding antibodies; D21, M3, M6 for neutralizing antibodies.

*Multiple testing: definition of families*

P-values were adjusted within test families. Families were defined as:

- Binding antibodies: each set of comparisons across the 24 isotype-antigen combinations (and by time point when applicable).
- Neutralization: comparisons across variants (and by time point when applicable).
- Cellular data: comparisons across T- and B-cell subpopulations (and by time point when applicable).

For univariable tests, adjustment used Benjamini-Hochberg FDR. For EMM-based pairwise contrasts (adjusted with emmeans library), adjustment used the Holm step-down method.

*DAG-guided adjustment and final covariate sets*

Directed acyclic graphs (created on DAGitty) were used to identify minimal sufficient adjustment sets and to guide interpretation of direct effects. To approximate comparable prior immune histories, models consistently included baseline seropositivity, baseline vaccination, and epidemic wave (proxy for circulating variant) as appropriate.

Final covariate sets by primary predictor:

- **Age:** Comorbidities, *COVID-19 wave*, *Seropositivity at baseline*, Symptoms, *Vaccination at baseline*.
- **BMI:** Comorbidities, *COVID-19 wave*, *Seropositivity at baseline*, Site, *Vaccination at baseline*.
- **Comorbidities:** Age, BMI, *COVID-19 wave*, *Seropositivity at baseline*, Sex, Symptoms, *Vaccination at baseline*.
- **HIV:** *COVID-19 wave*, *Seropositivity at baseline*, Site, Symptoms, *Vaccination at baseline*.
- **COVID-19 wave:** *Seropositivity at baseline*, Site, *Vaccination at baseline*.
- **Baseline seropositivity:** *COVID-19 wave, Vaccination at baseline*.
- **Sex:** Comorbidities, *COVID-19 wave*, *Seropositivity at baseline*, Symptoms, *Vaccination at baseline*.
- **Site:** BMI, Comorbidities, HIV, *COVID-19 wave*, *Seropositivity at baseline*, Symptoms, *Vaccination at baseline*.
- **Symptoms:** Age, Comorbidities, HIV, *COVID-19 wave*, *Seropositivity at baseline*, Sex, *Vaccination at baseline*.
- **Baseline vaccination:** Comorbidities, *COVID-19 wave*, *Seropositivity at baseline*, Site, Symptoms.

Variables in italics denote the components of prior/current immunological history. Note that baseline vaccination compares vaccinated vs. non-vaccinated; unknown status excluded.

*Correlates of protection: additional details*

For reinfection analyses, besides univariable logistic regressions, Wilcoxon rank-sum comparisons between reinfected vs. non-reinfected participants were performed at early time points (D0, D21, M1, M3) with BH correction.

*Model diagnostics*

Assumptions were evaluated via Q-Q plots, histograms of residuals, residuals vs. fitted plots, and subject-level residual trajectories over time. For GLMMs, additional checks included conditional residual patterns and dispersion structure. Plots/summaries used performance, ggplot2, and sjPlot.


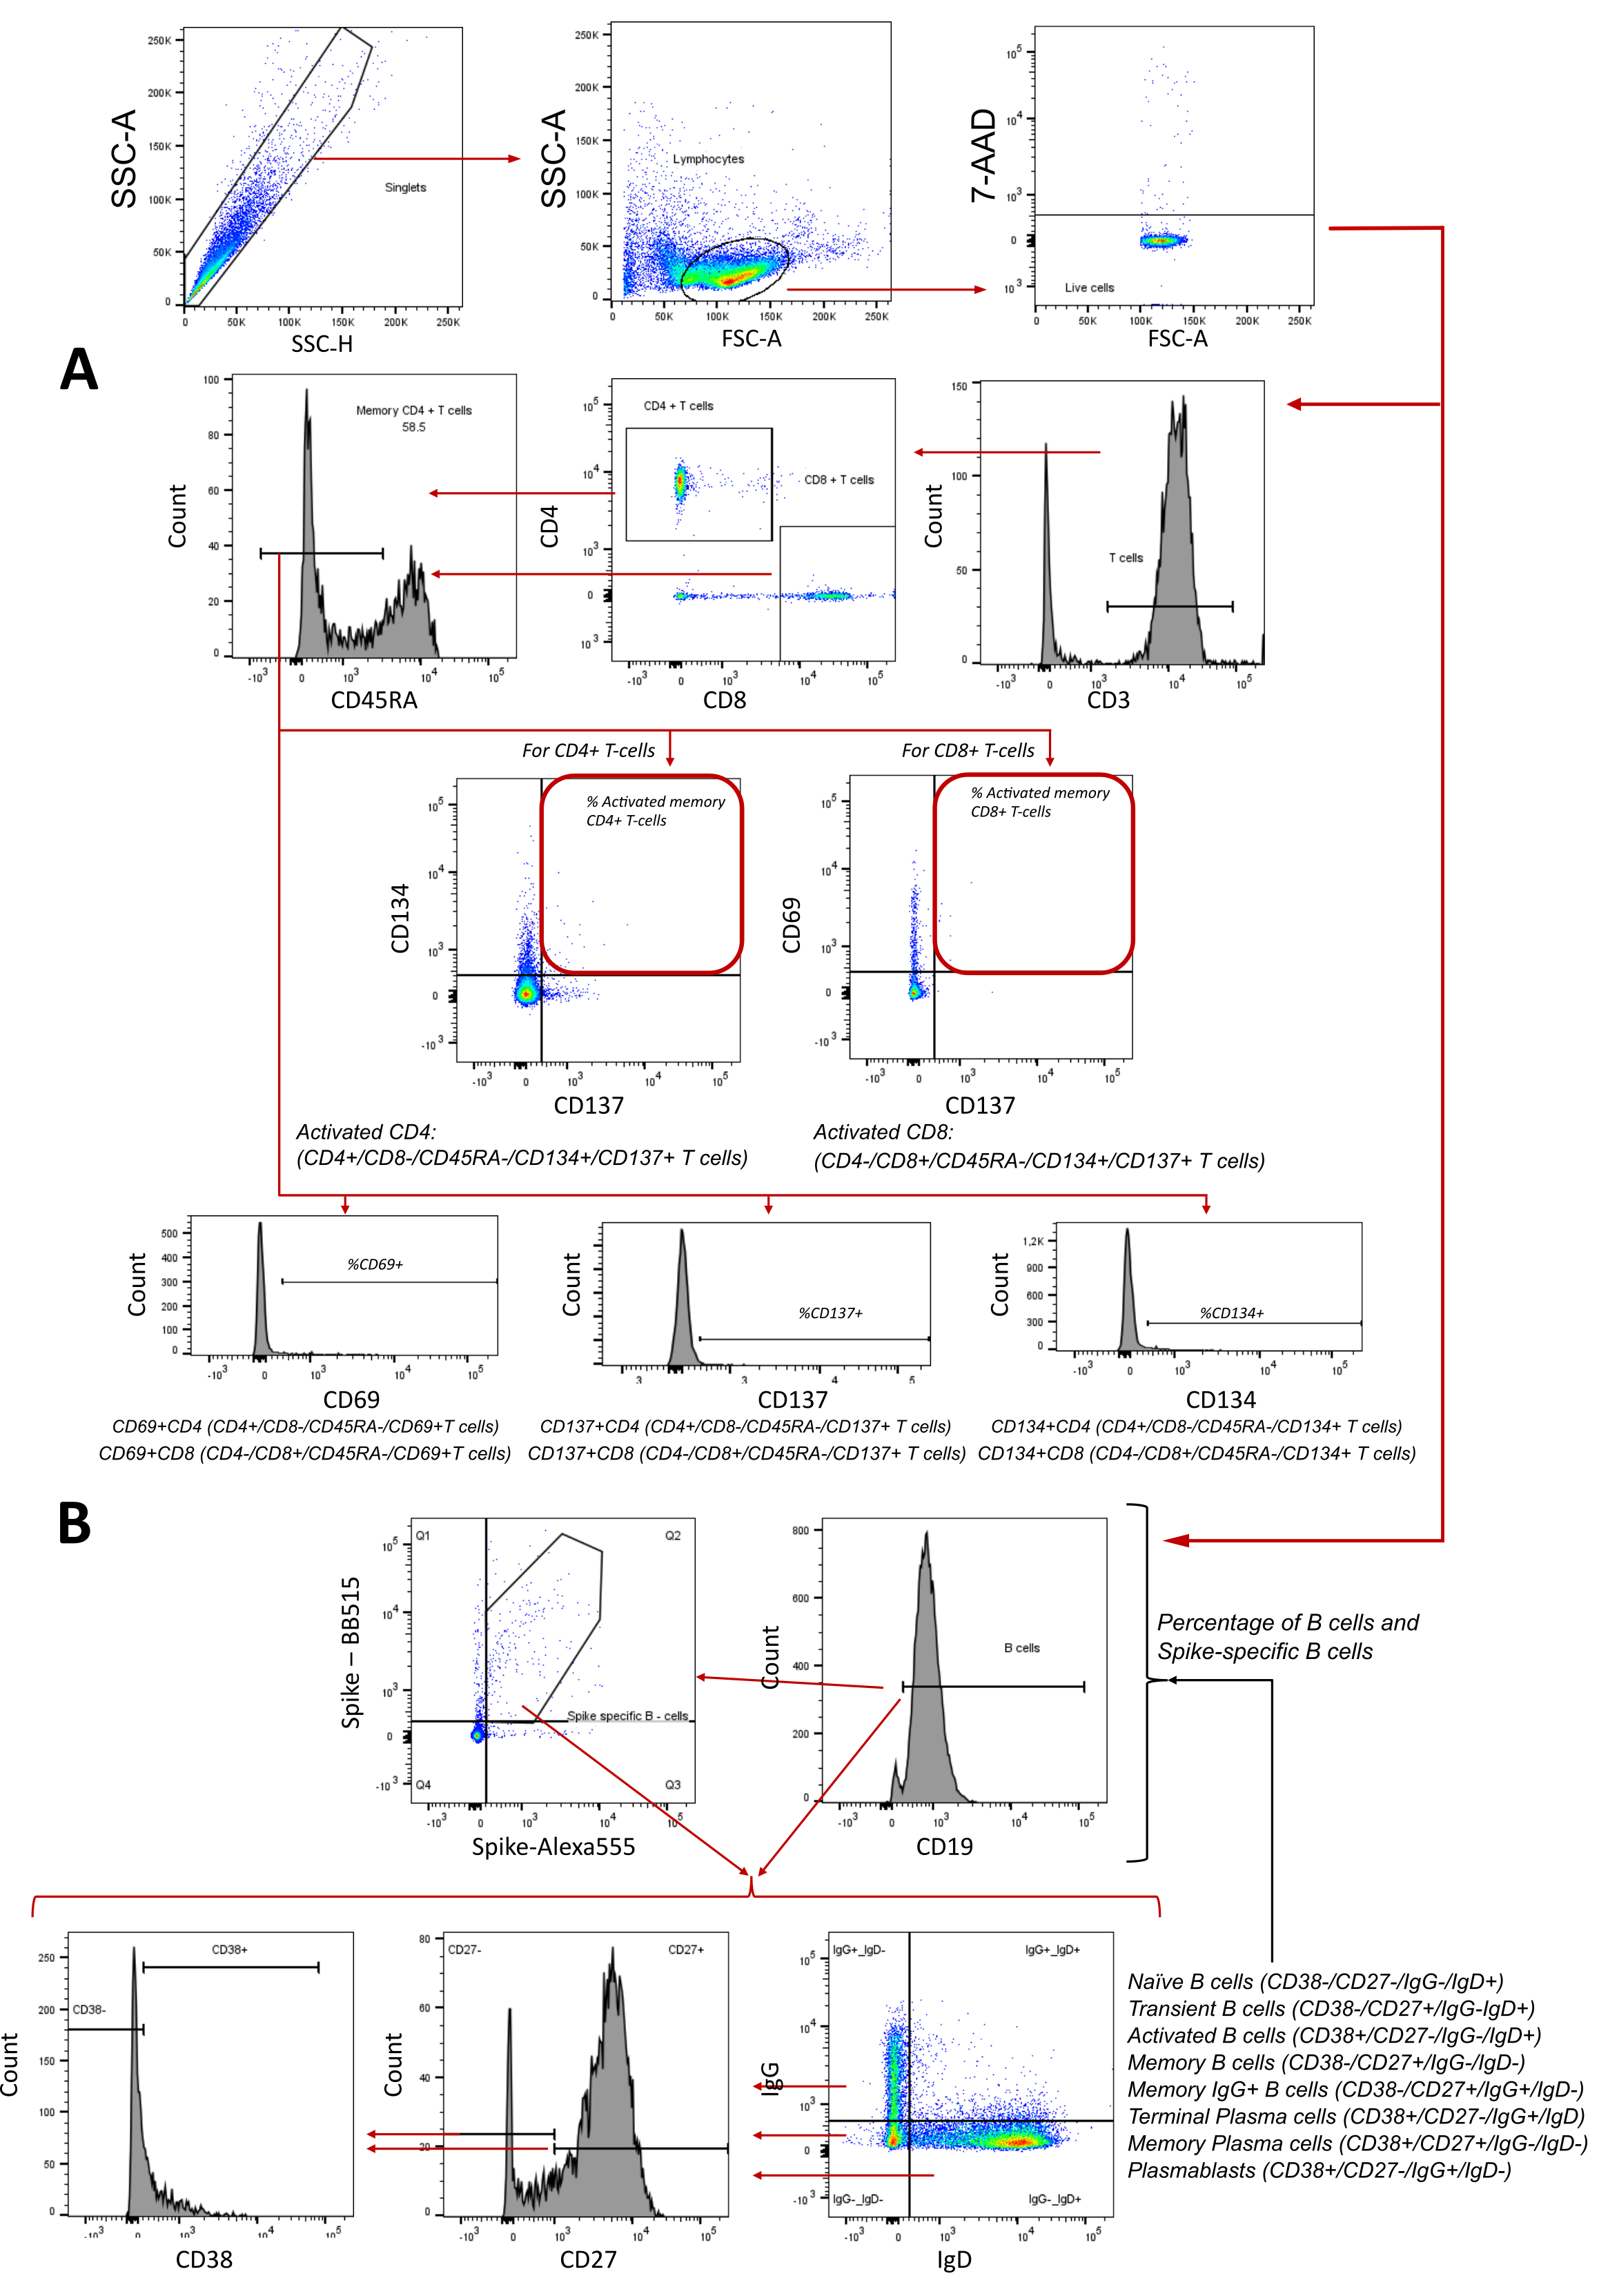


**Figure S 1 Gating strategy for AIM+ T-cells and B-cells analyses.**

(A) T-cell gating strategy: after excluding duplicate-cells, lymhpocytes (Forward-/Side-scatter), 7-AAD-negative, and CD3 positive cells were gated to identify live T-cells. Subsequent gating for CD4+/CD8- or CD4-/CD8+ cells which were negative for CD45RA, allowed the identification of memory CD4/8 T cells. The dual-expression of activation markers CD134/CD137, and CD69/CD137 was then used to determine the frequency of double-positive (activated) CD4 and CD8 memory T cells respectively.

(B) B-cell gating strategy: after excluding duplicate-cells, lymphocytes (Forward-/Side-scatter), 7-AAD-negative, and CD19 positive cells were gated to identify live B-cells. Next, S-protein specific B-cells were identified by gating for B-cells positive for both tetramers. Within each respective population (total live B-cells and S-protein specific B-cells), cells were subsequently gated for IgG/IgD to identify class switching, followed by CD27-/+ and CD38-/+ gating to differentiate memory/activation subtypes. This identified the following subtypes: Naïve B-cells (CD38-/CD27-/IgG-/IgD+), Transient B-cells (CD38-/CD27+/IgG-/IgD+), Activated B-cells (CD38+/CD27-/IgG-/IgD+), Memory B-cells (CD38-/CD27+/IgG-/IgD-), Memory IgG+ B-cells (CD38-/CD27+/IgG+/IgD-), Terminal Plasma cells (CD38+/CD27-/IgG+/IgD), Memory Plasma cells (CD38+/CD27+/IgG-/IgD-), and Plasmablasts (CD38+/CD27-/IgG+/IgD-). In addition, Spike-specific B-cells were determined by gating for cells positive for both versions of Spike-tetramers (Spike-Alexafluor 555 & Spike-BB515) and represented as % of spike positive B-cells within B-cells. Finally, the same subpopulations were determined, based on IgG/IgD, CD27, and CD38, and represented as percentages within S-positive B-cells.


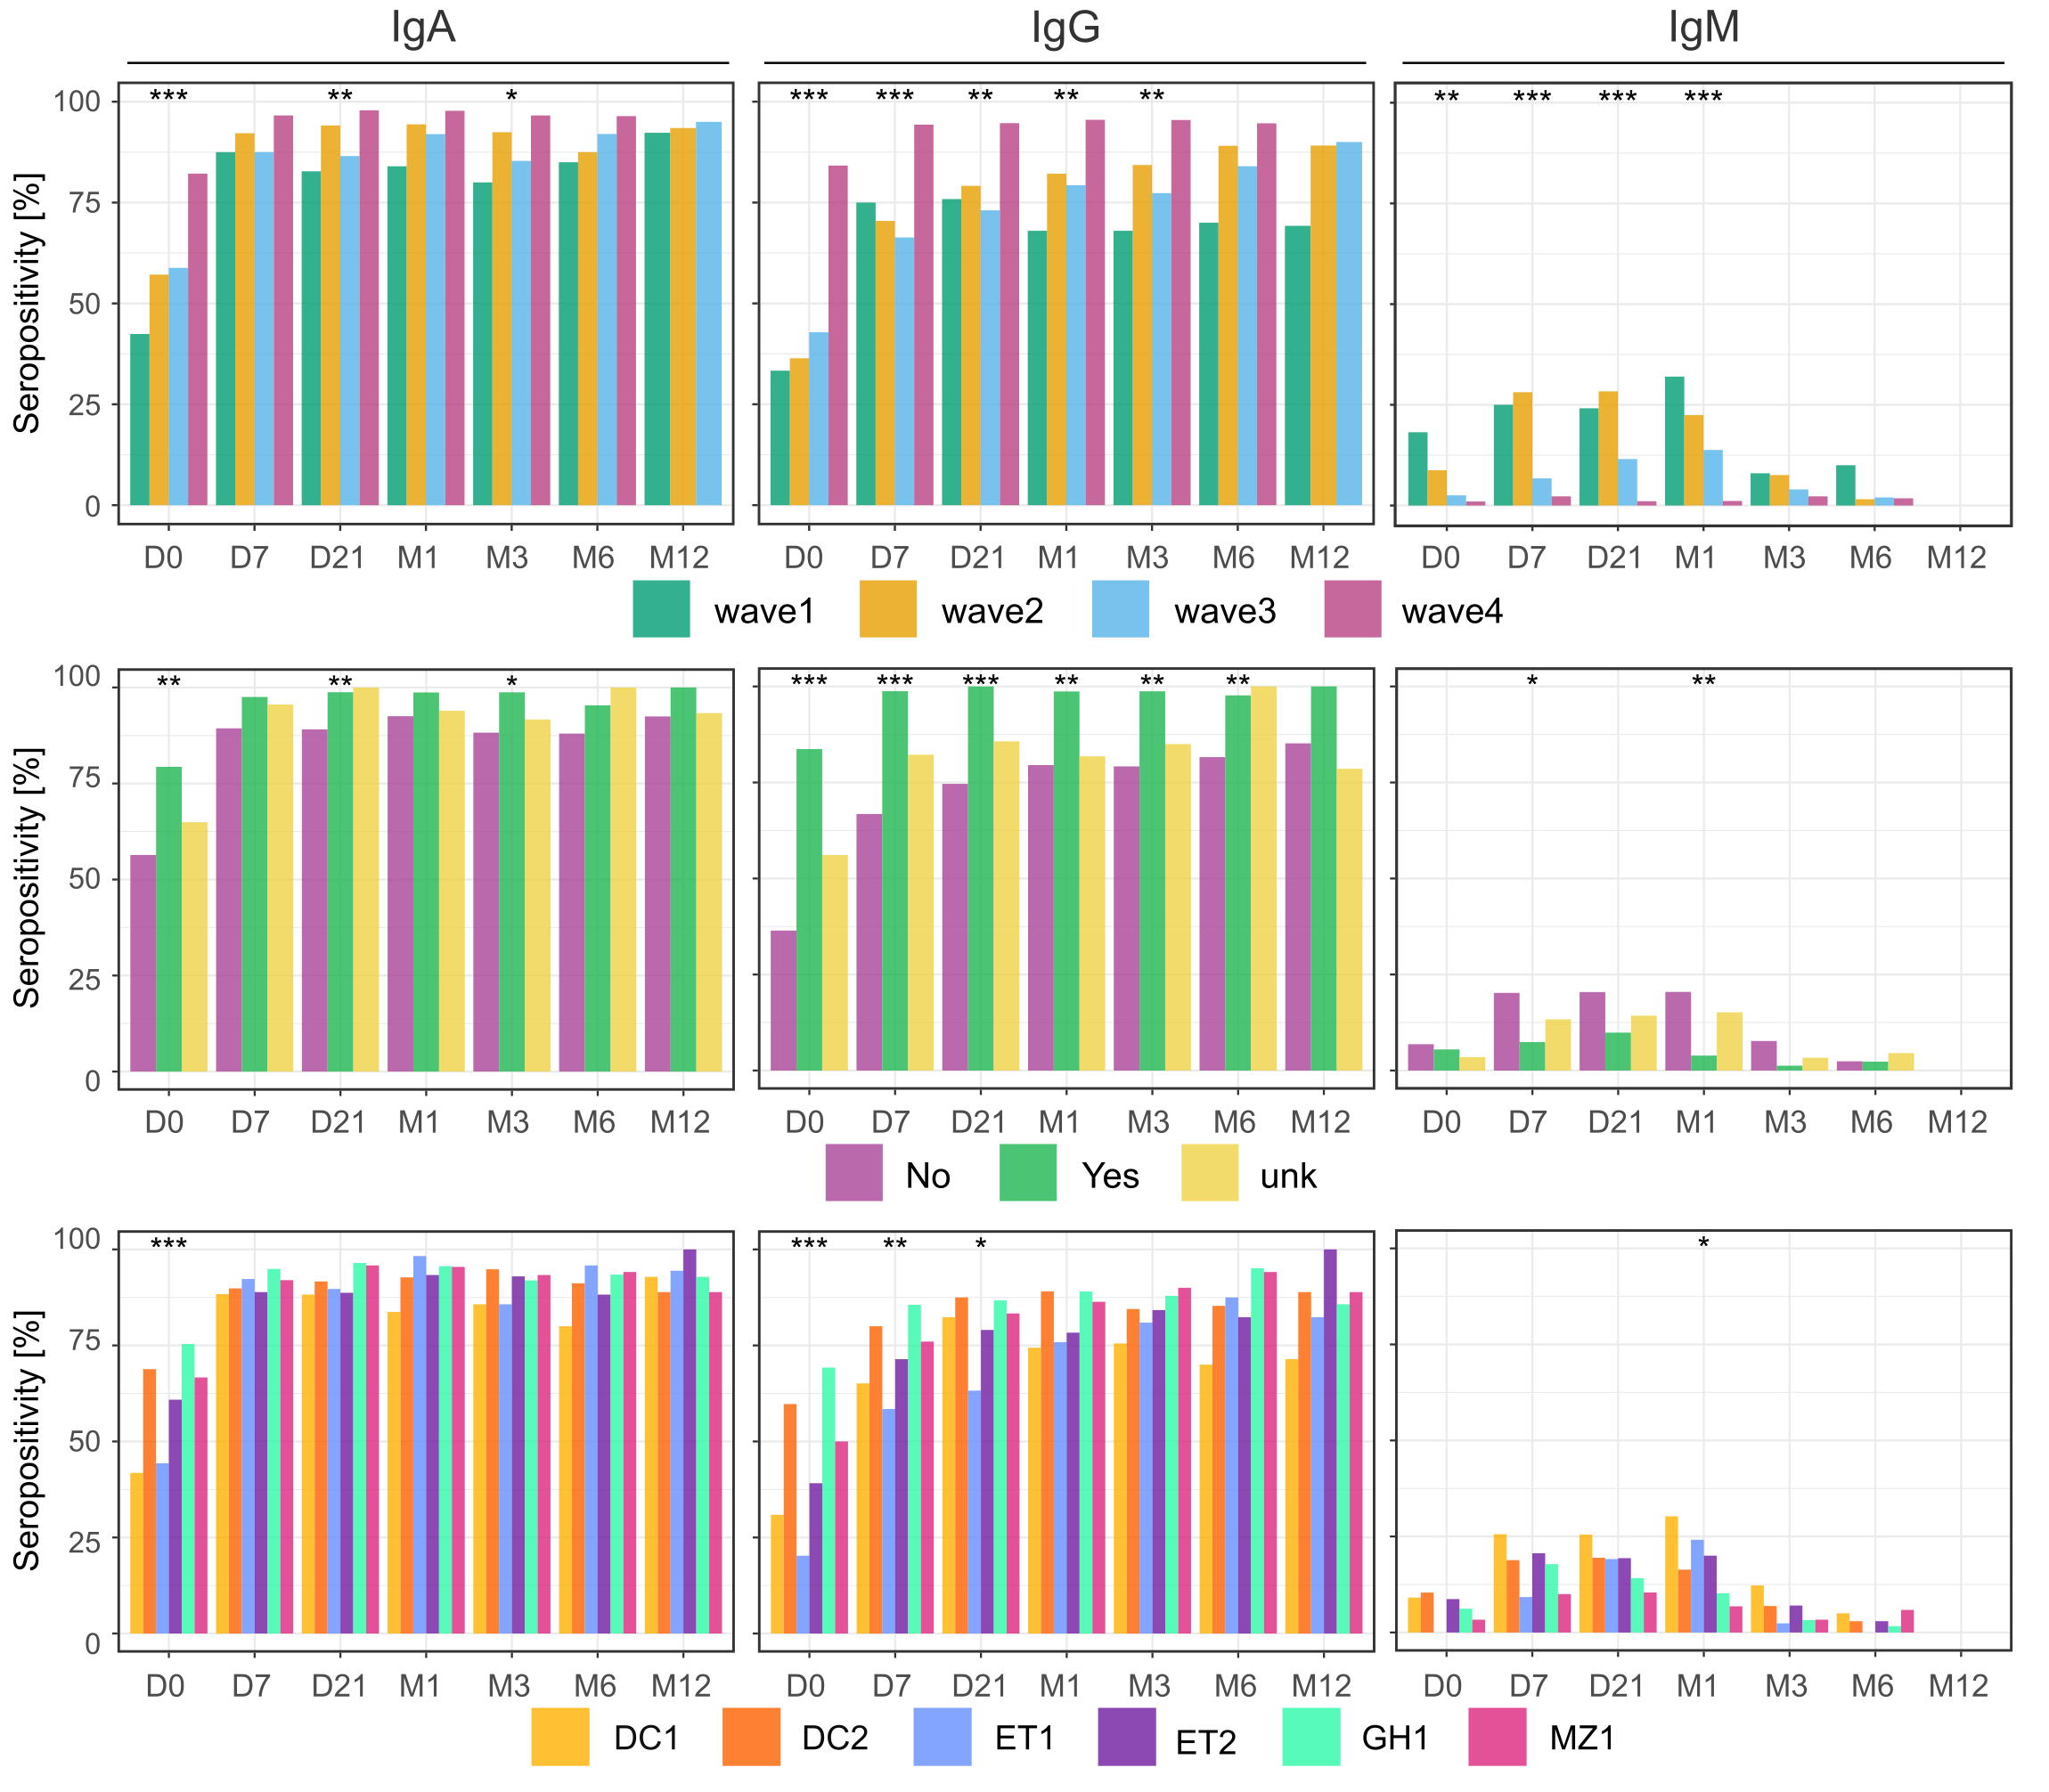


**Figure S 2 Seropositivity rates of anti-SARS-CoV-2 antibodies across epidemic waves, vaccination status, and study sites.**

Seropositivity rates (%) from D0 to M12 for anti-SARS-CoV-2 IgA (left), IgG (center), and IgM (right), stratified by epidemic wave, vaccination status, and study site. Asterisks indicate statistically significant differences at each time point based on χ2 tests (*p < 0.05, **p < 0.01, ***p < 0.001). IgM consistently shows lower seropositivity across groups and time points. IgA and IgG reach high prevalence early post-infection, with IgG levels significantly higher in vaccinated participants and in wave 4 across most time points. Site-specific differences become non-significant after D0 (IgA) and D21 (IgG).


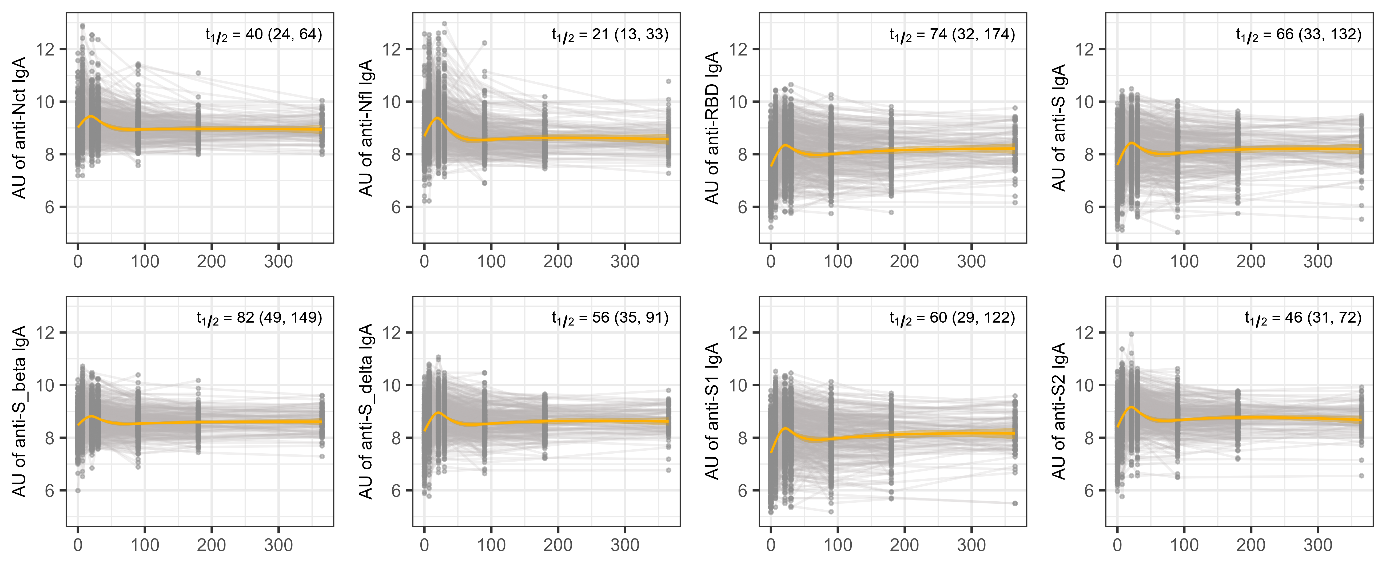

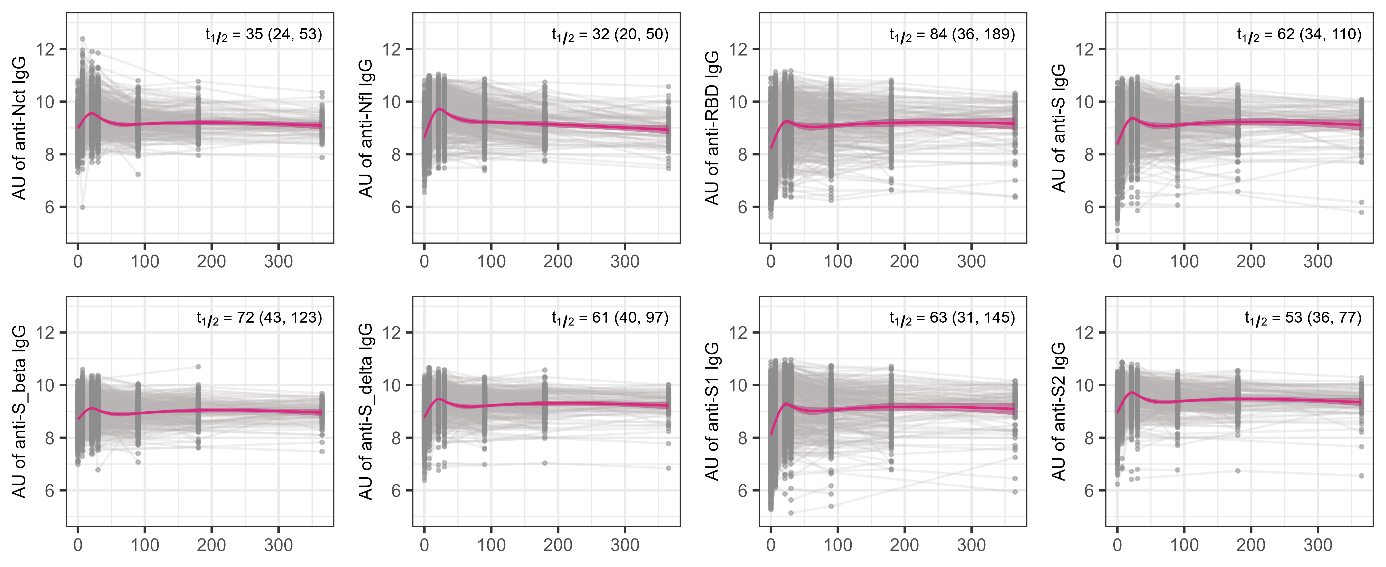

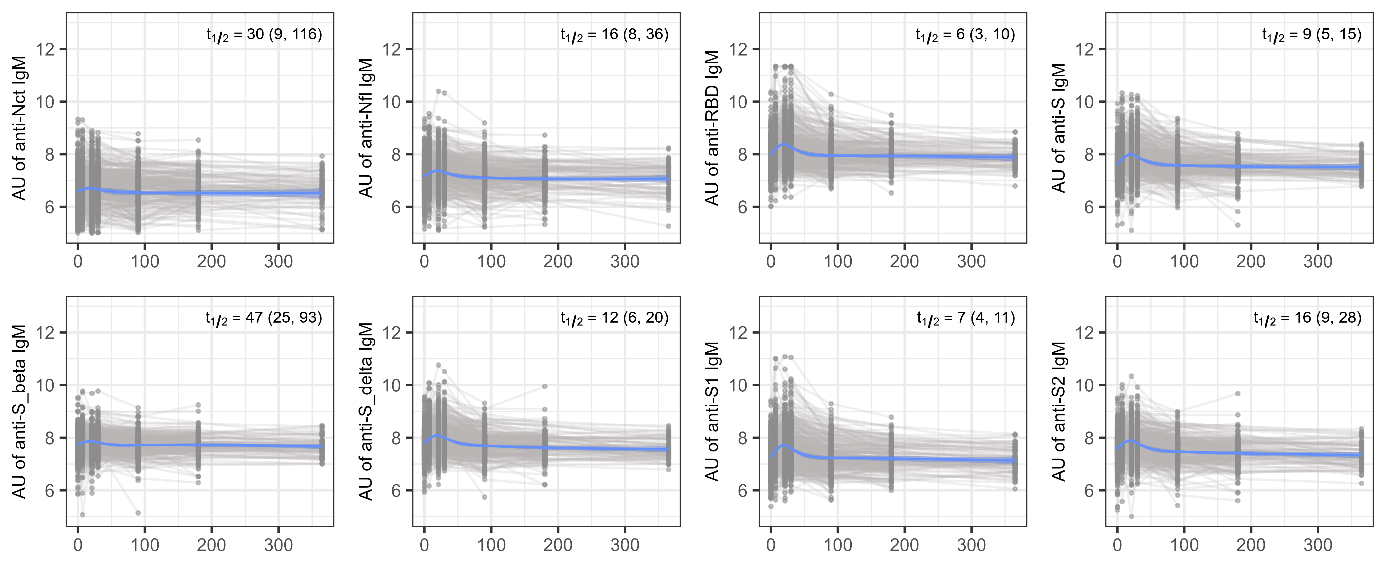


**Figure S 3 Longitudinal kinetics and estimated half-lives of antibody responses across antigens.**

Smoothed longitudinal profiles of antibody levels (log10 AU) stratified by antigen and isotype: IgA (yellow), IgG (pink), and IgM (blue). Gray lines represent individual participant trajectories. Curves are modeled using natural cubic splines with knots at D21, M1, and M3. Estimated antibody half-lives (t1/2, in days) with 95% confidence intervals are shown in each panel. IgA and IgG demonstrate more sustained responses over time, while IgM responses are shorter-lived.


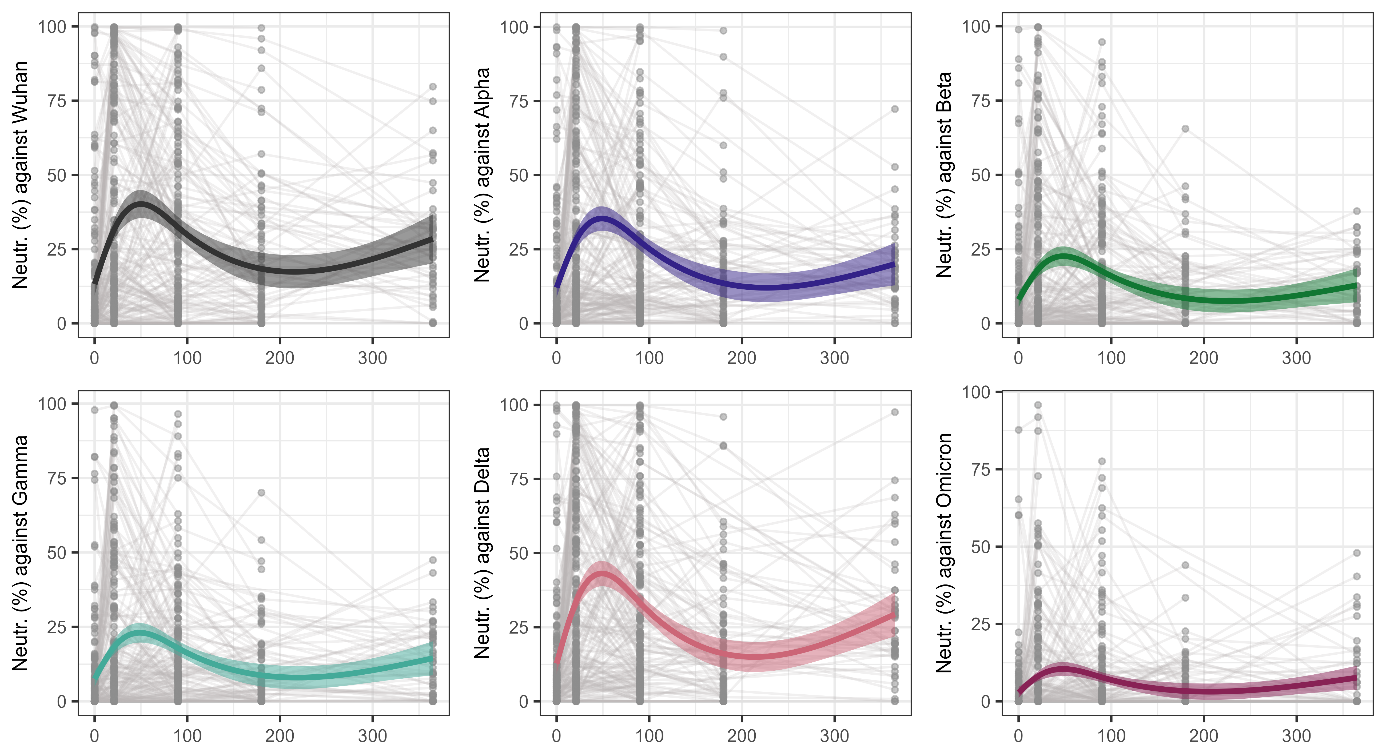


**Figure S 4 Longitudinal kinetics of neutralizing antibody activity against SARS-CoV-2 variants.**

Neutralizing activity (% inhibition) over time for six SARS-CoV-2 variants: Wuhan, Alpha, Beta, Gamma, Delta, and Omicron. Gray lines show individual participant trajectories; colored curves represent natural cubic spline fits with 95% confidence intervals (shaded areas). Neutralization peaked early and declined over time for all variants, with lower responses observed for Beta, Gamma, and, most notably, Omicron.


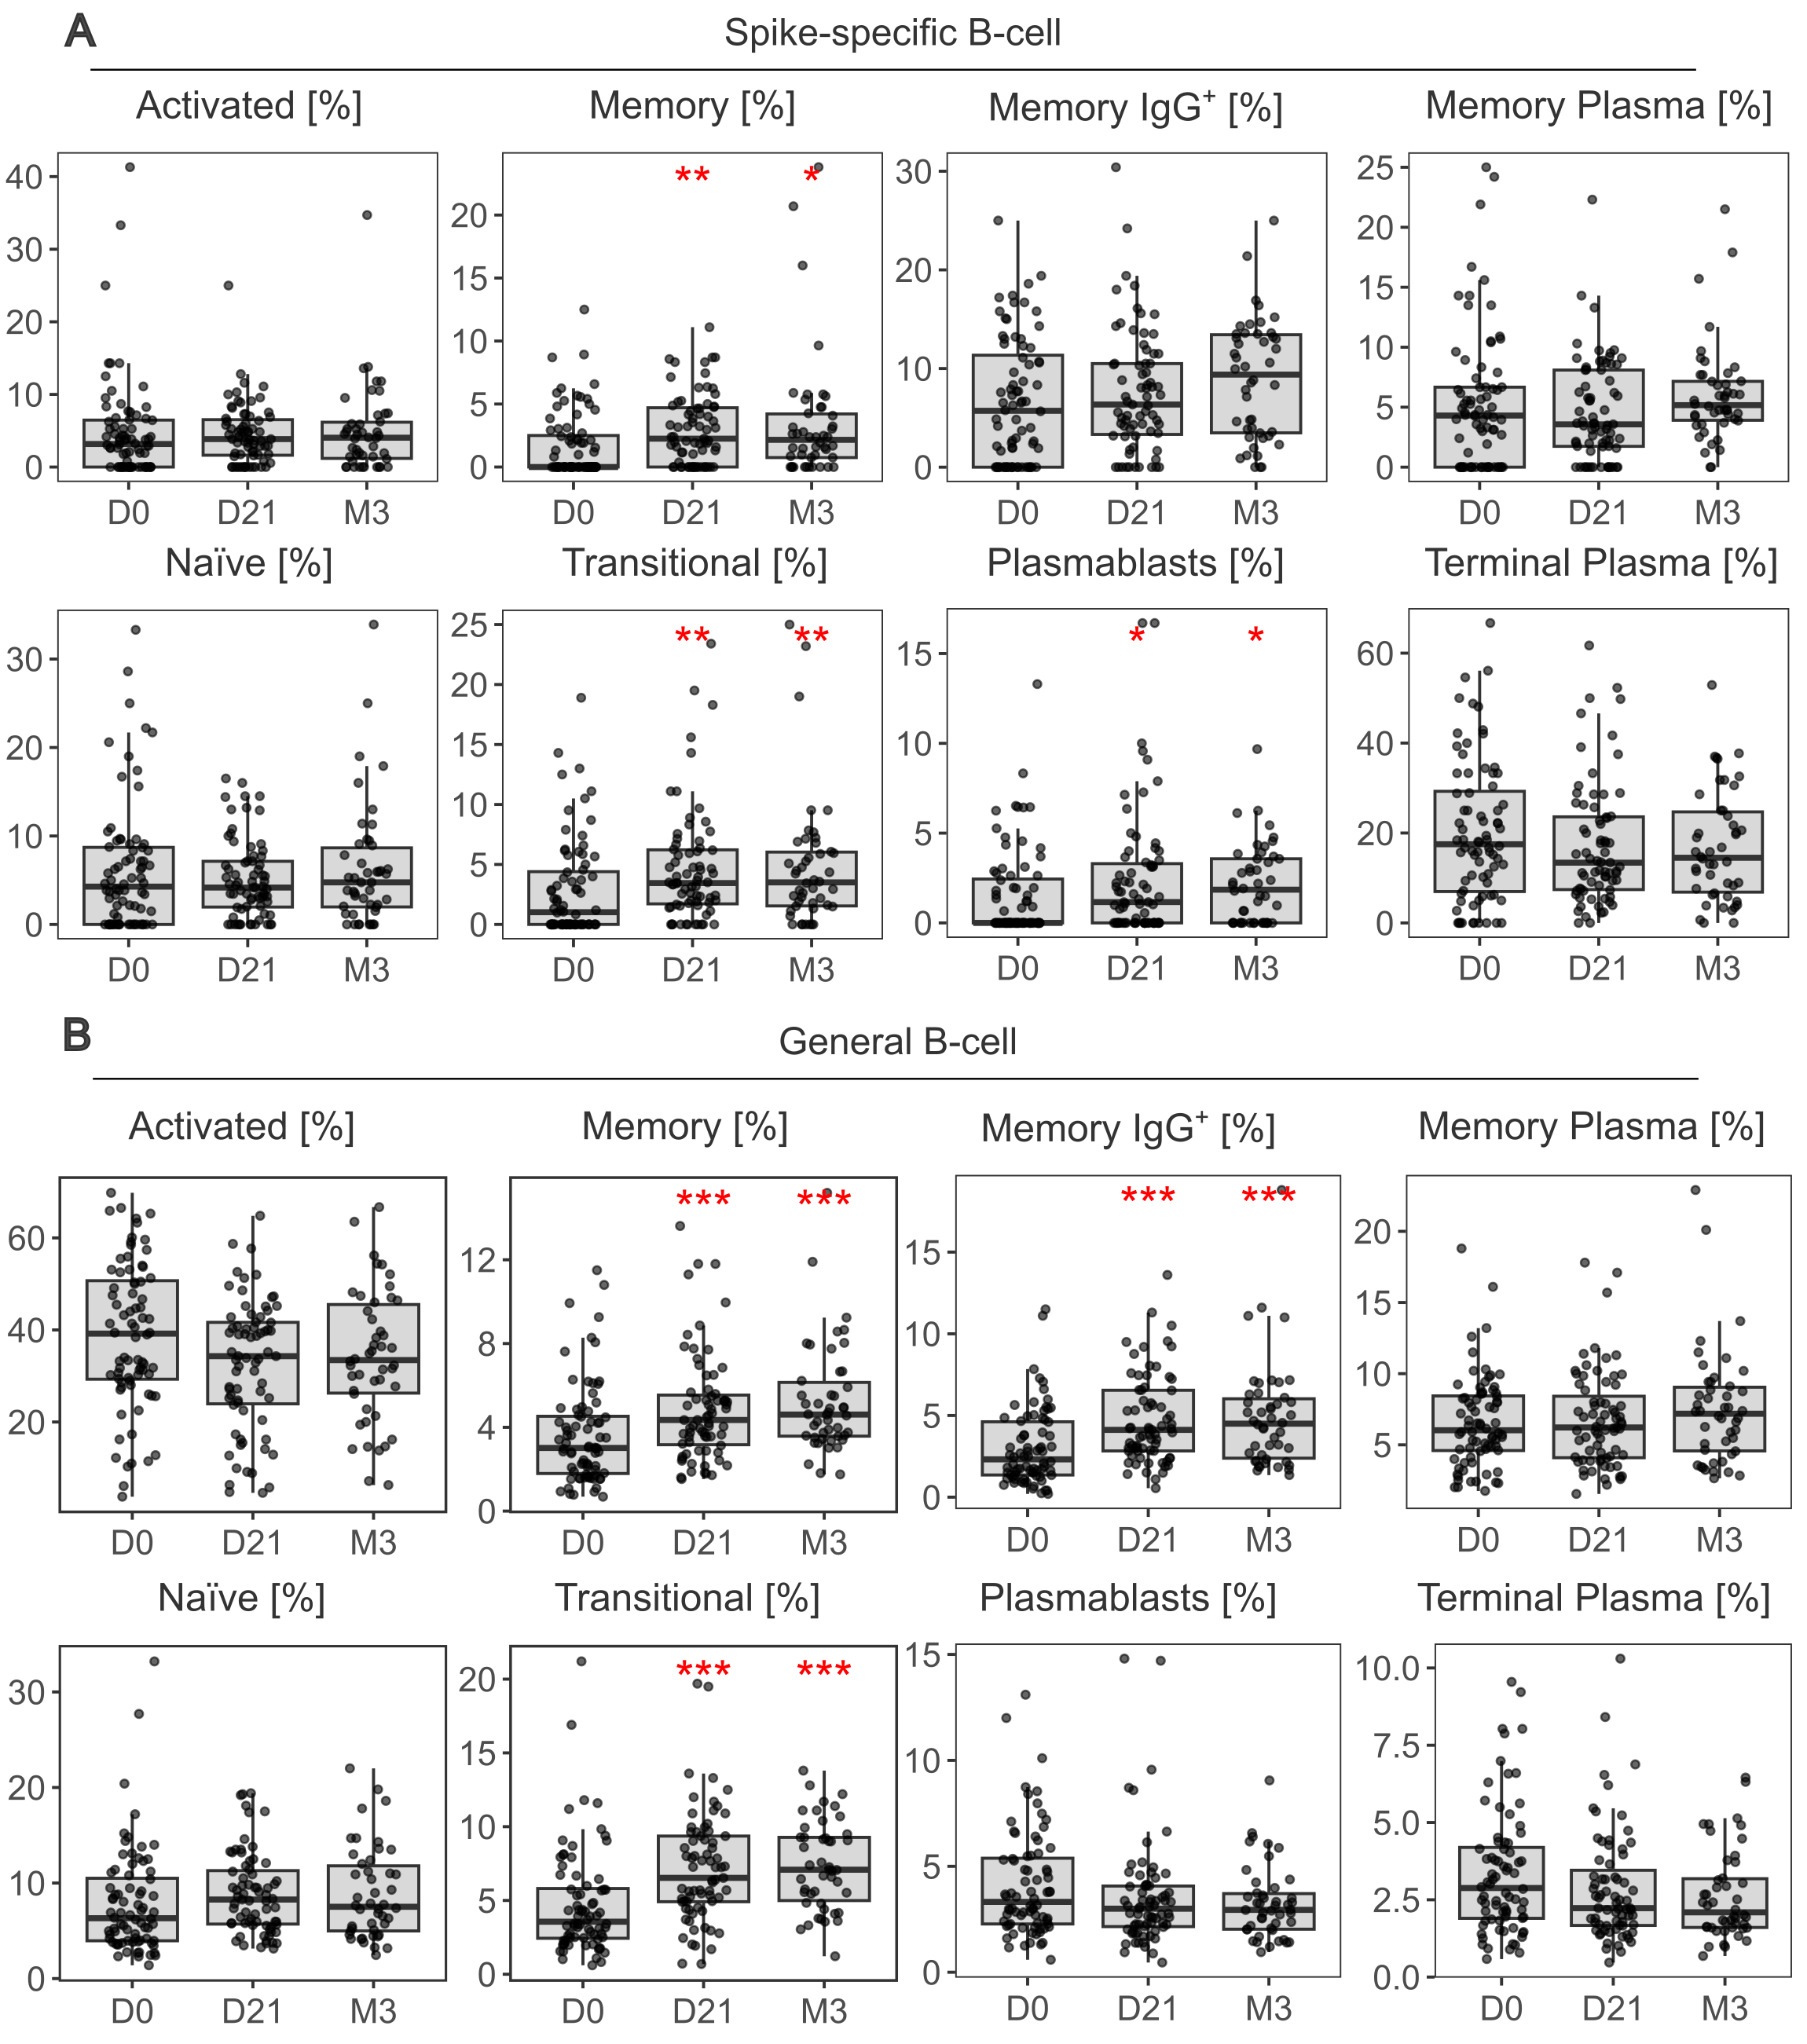


**Figure S 5 Longitudinal dynamics of spike-specific and general B cell subsets following SARS-CoV-2 infection.**

(A) Spike-specific B cell subsets measured at D0, D21, and M3 in participants from the ciclesonide-nitazoxanide and Paracetamol arms. Subpopulations include: Activated B cells, Memory B cells, Memory IgG+ B cells, Memory Plasma cells, Naïve B cells, Transitional B cells, Plasmablasts, and Terminal Plasma cells.

(B) General (non-spike-specific) B cell subsets measured at the same time points in the same participants. The same eight phenotypic categories are shown.

Boxplots display frequencies per time point. Sample size is n=76 for D0, n=71 for D21, and n=46 for M3. Statistical comparisons across time points were performed using Kruskal-Wallis tests followed by Dunn’s post hoc test. P-values were adjusted using the Benjamini-Hochberg method. Significant differences are indicated with red asterisks: *p < 0.05, **p < 0.01, ***p < 0.001.


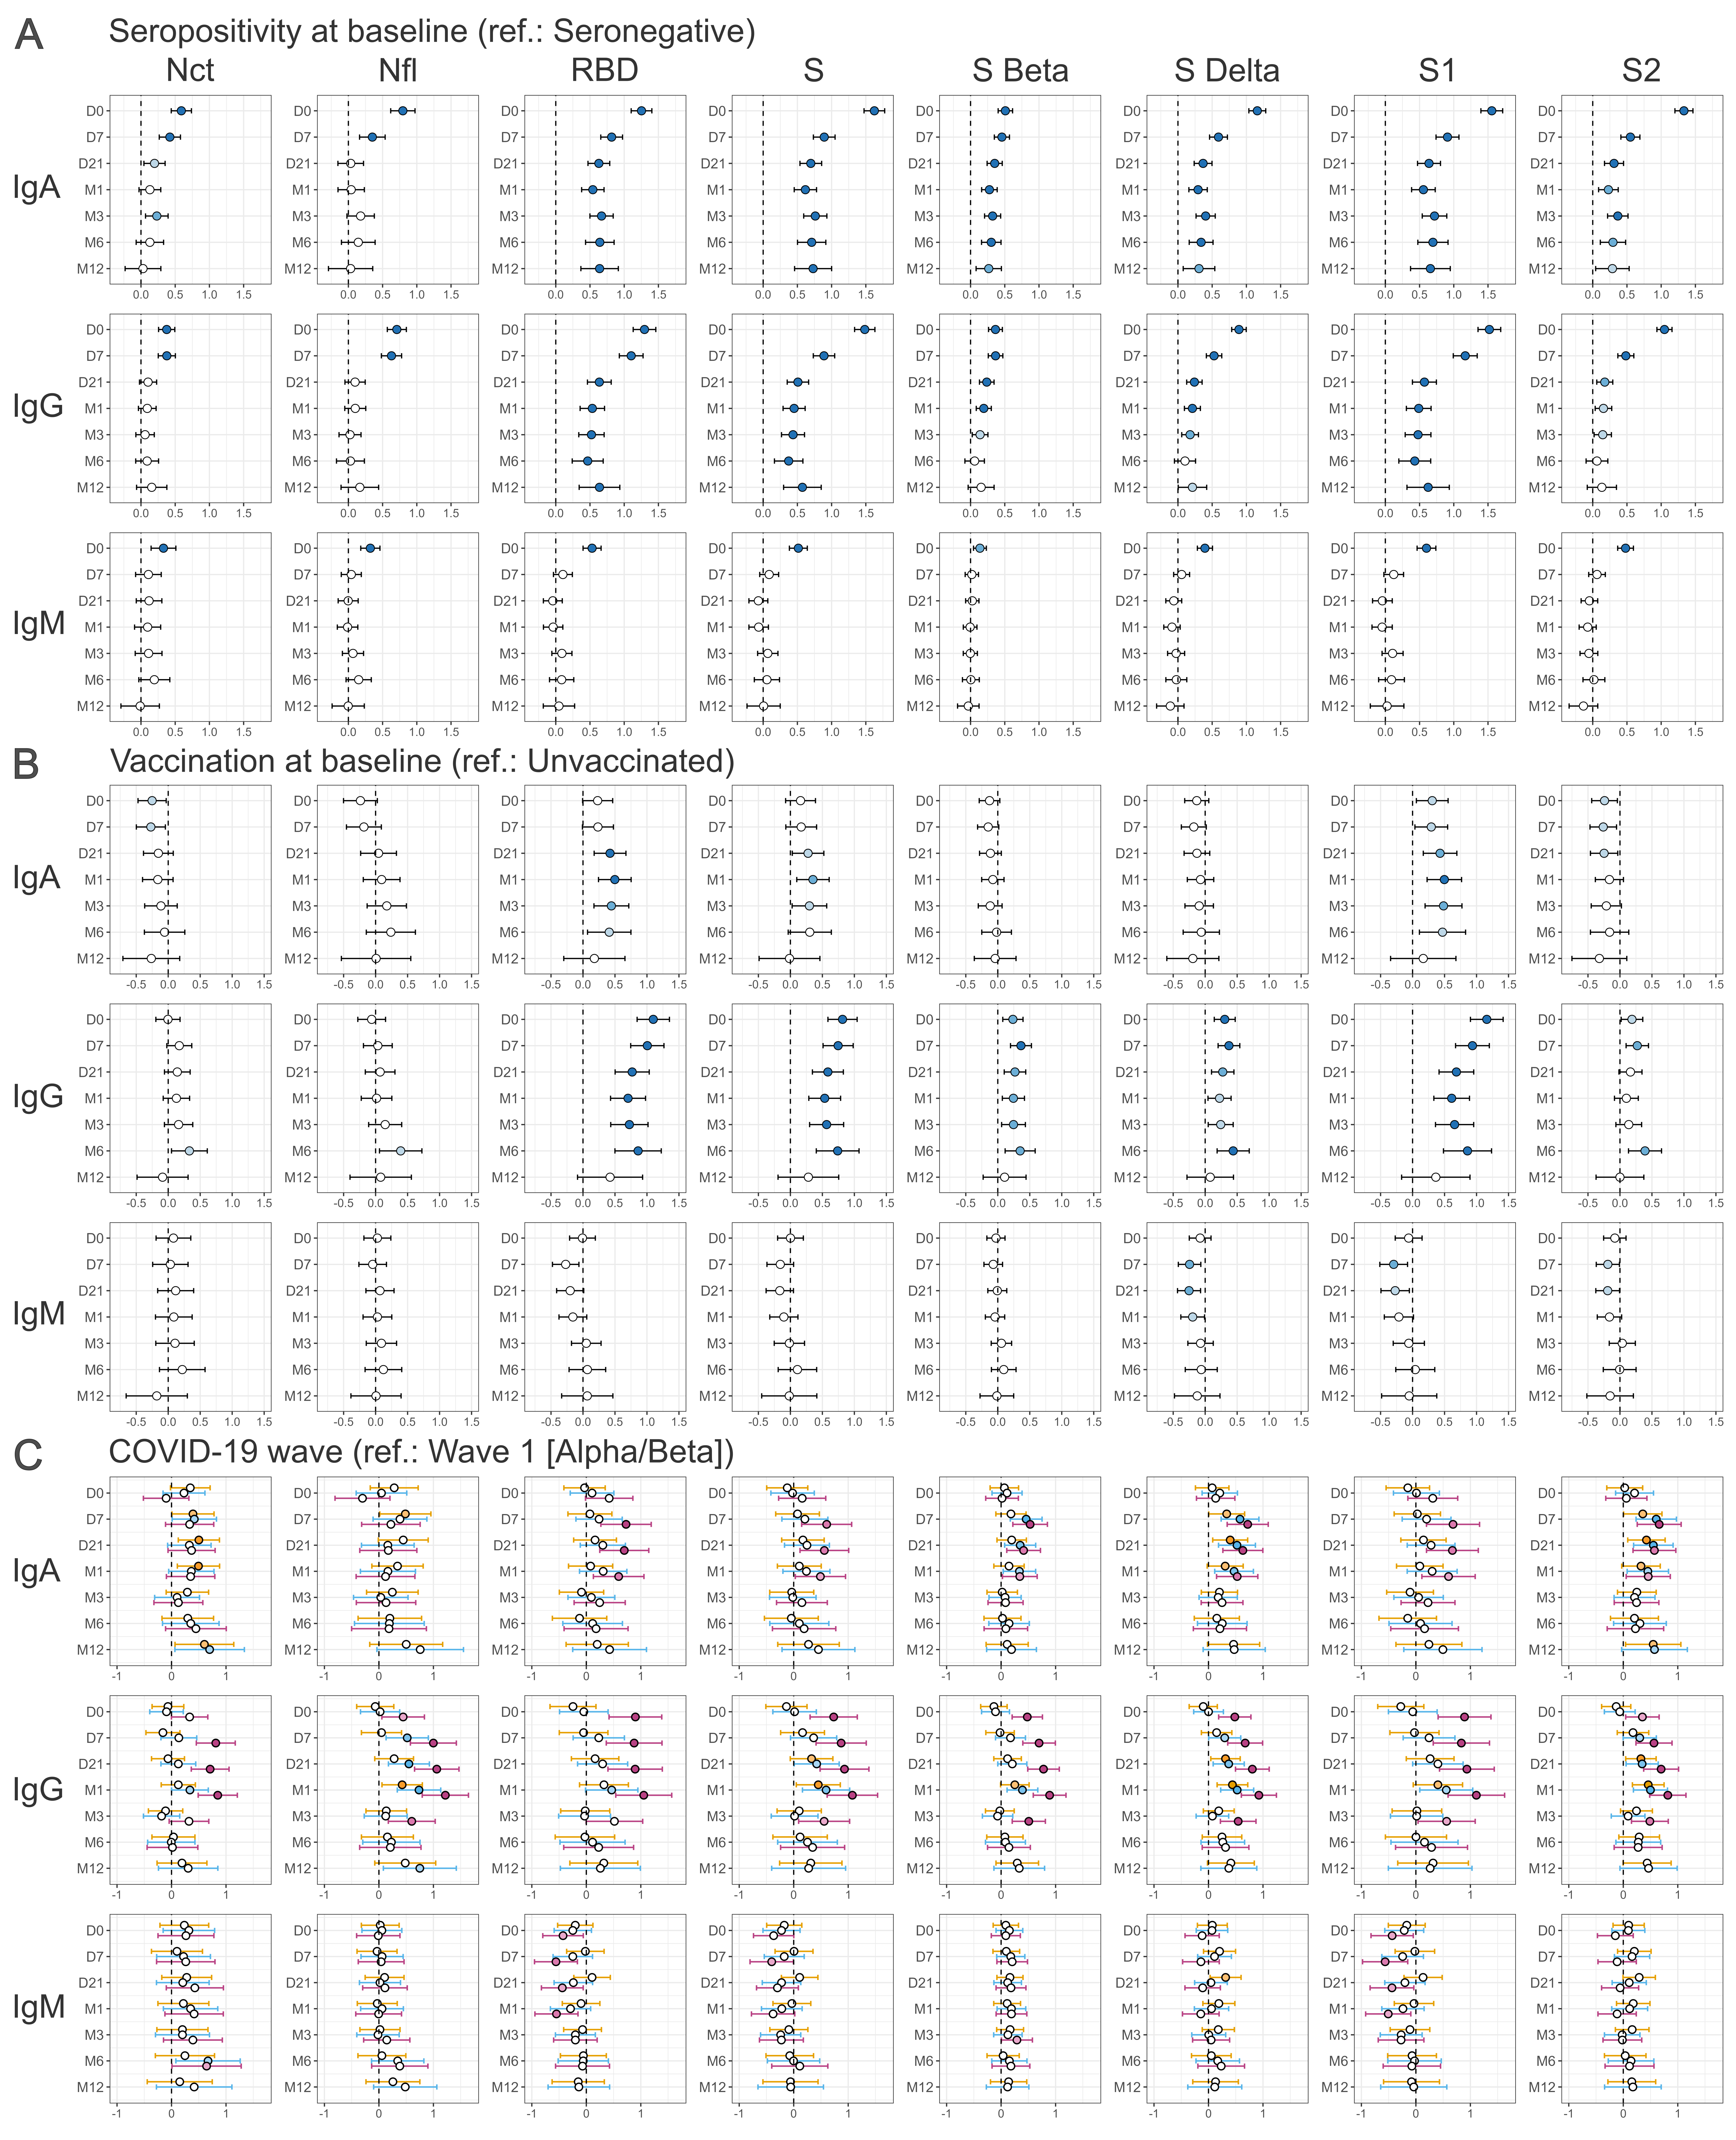


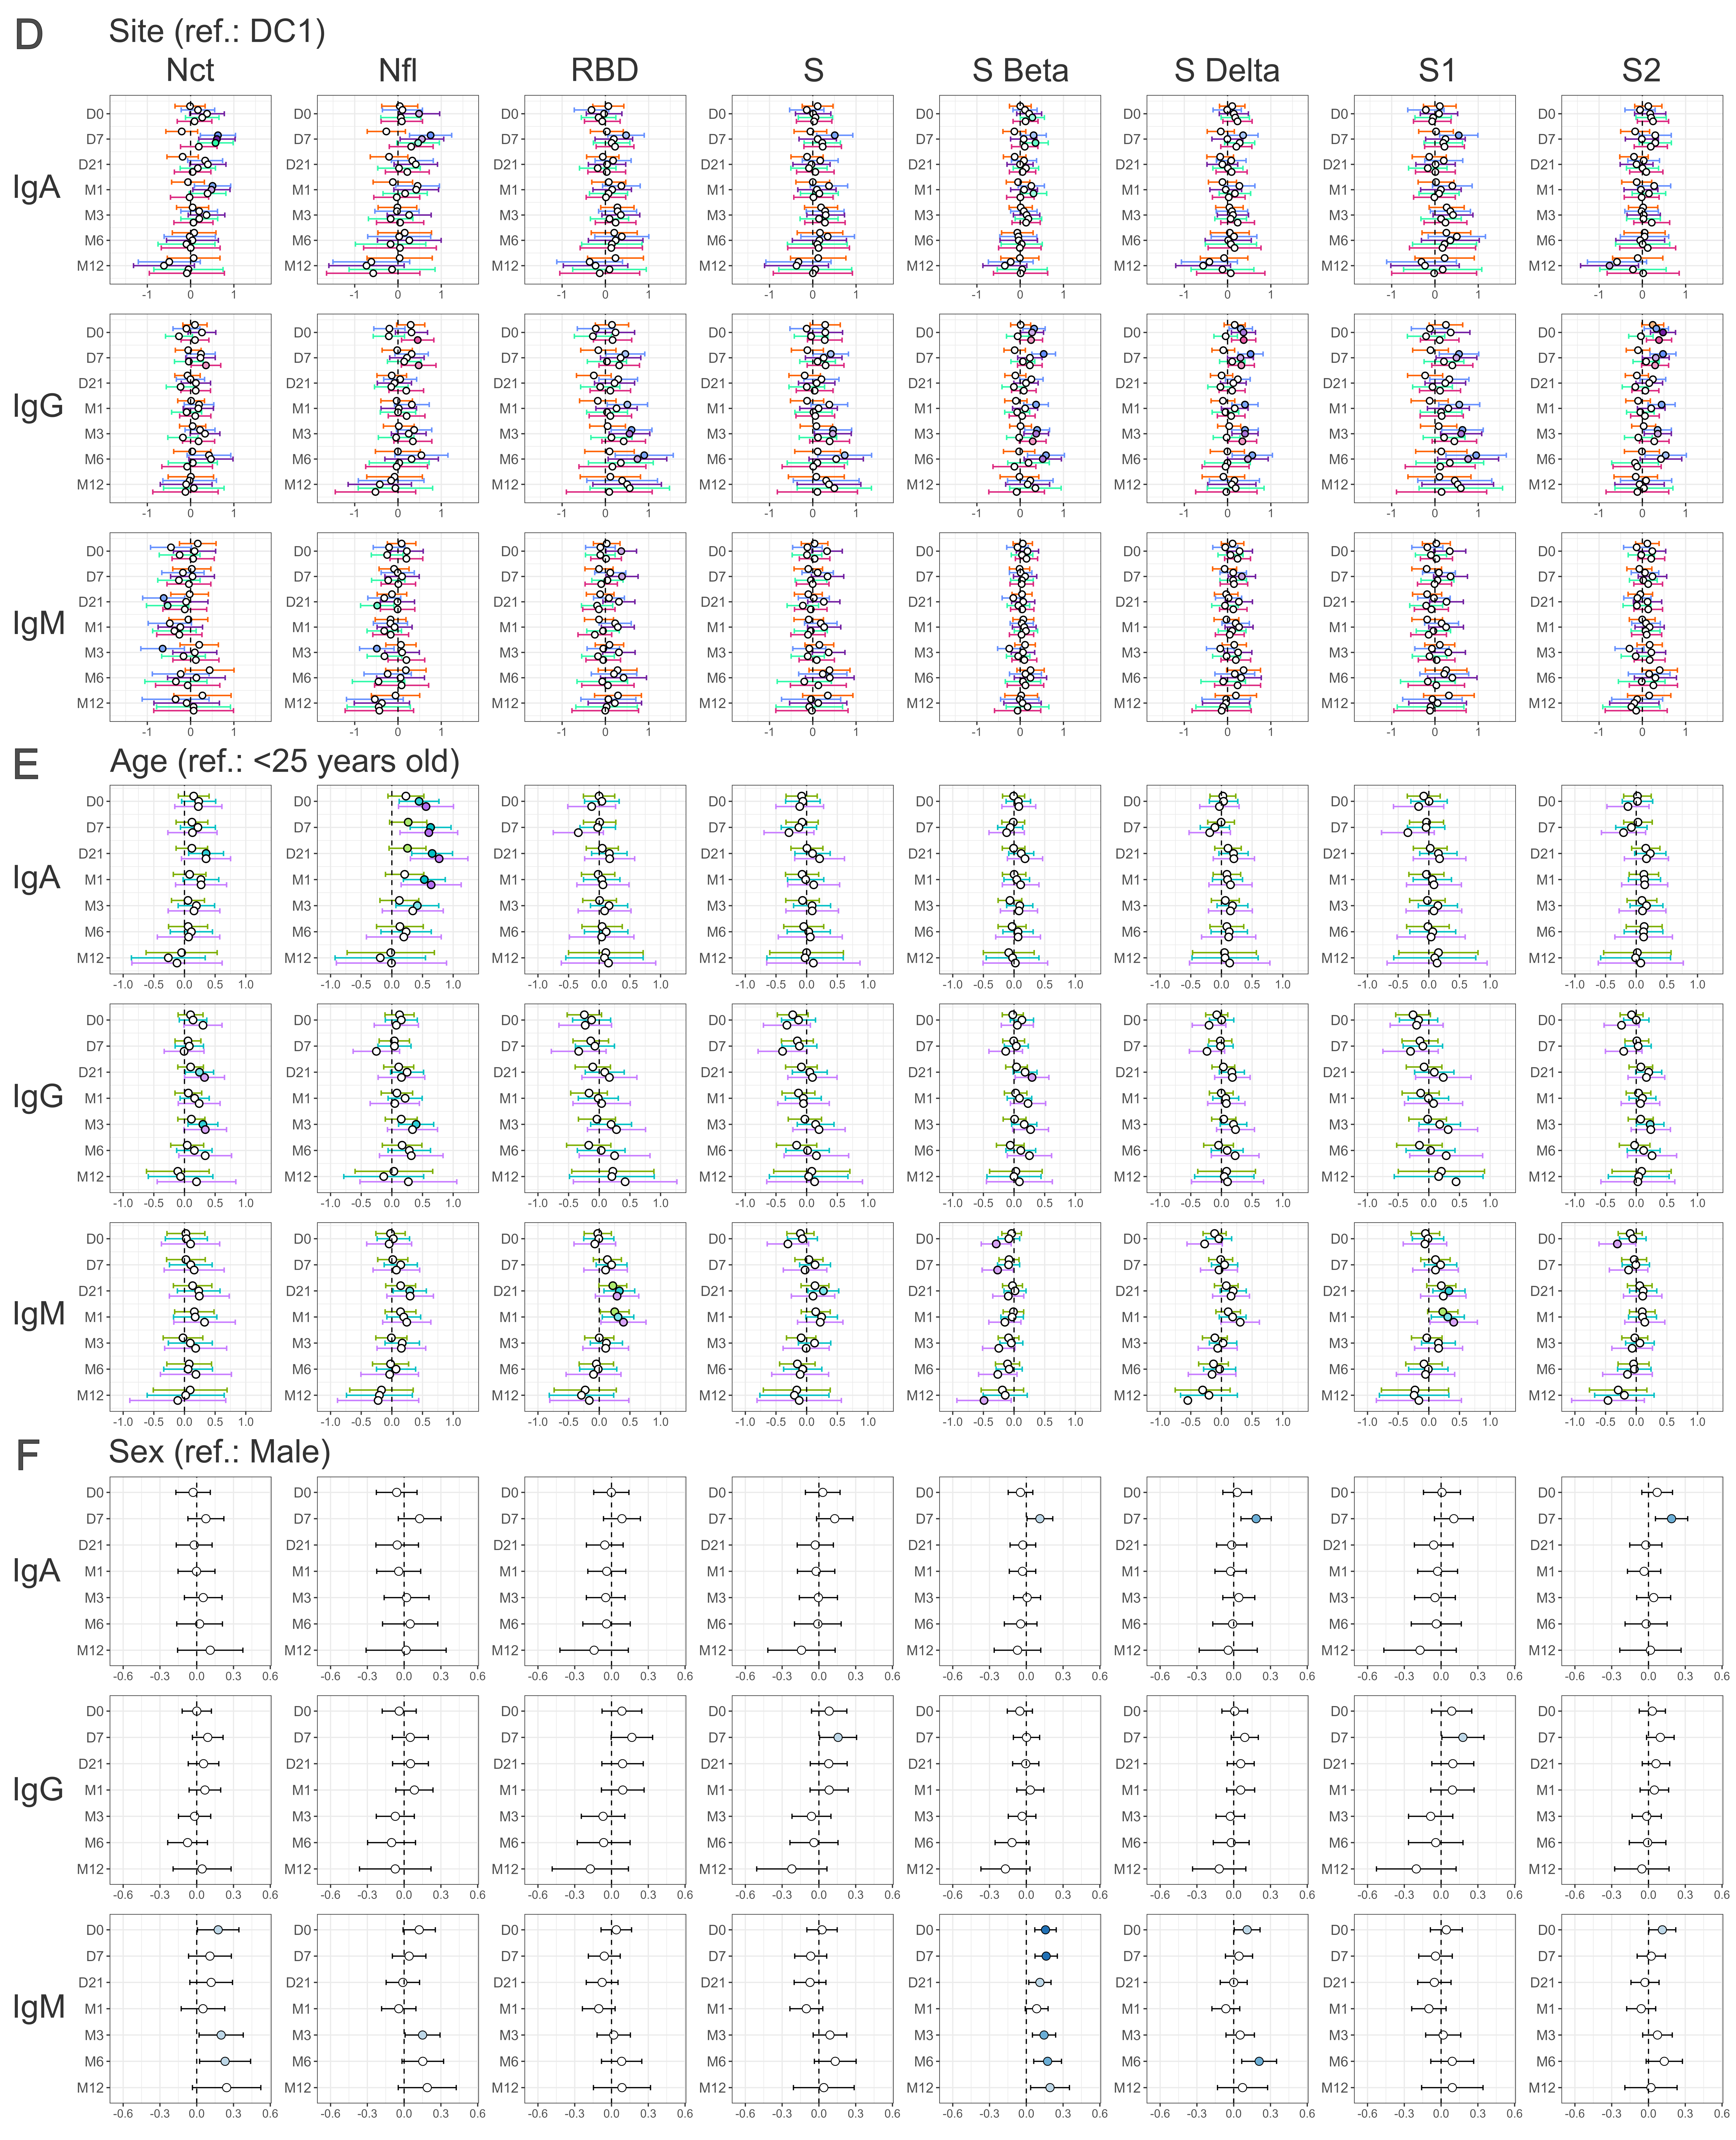

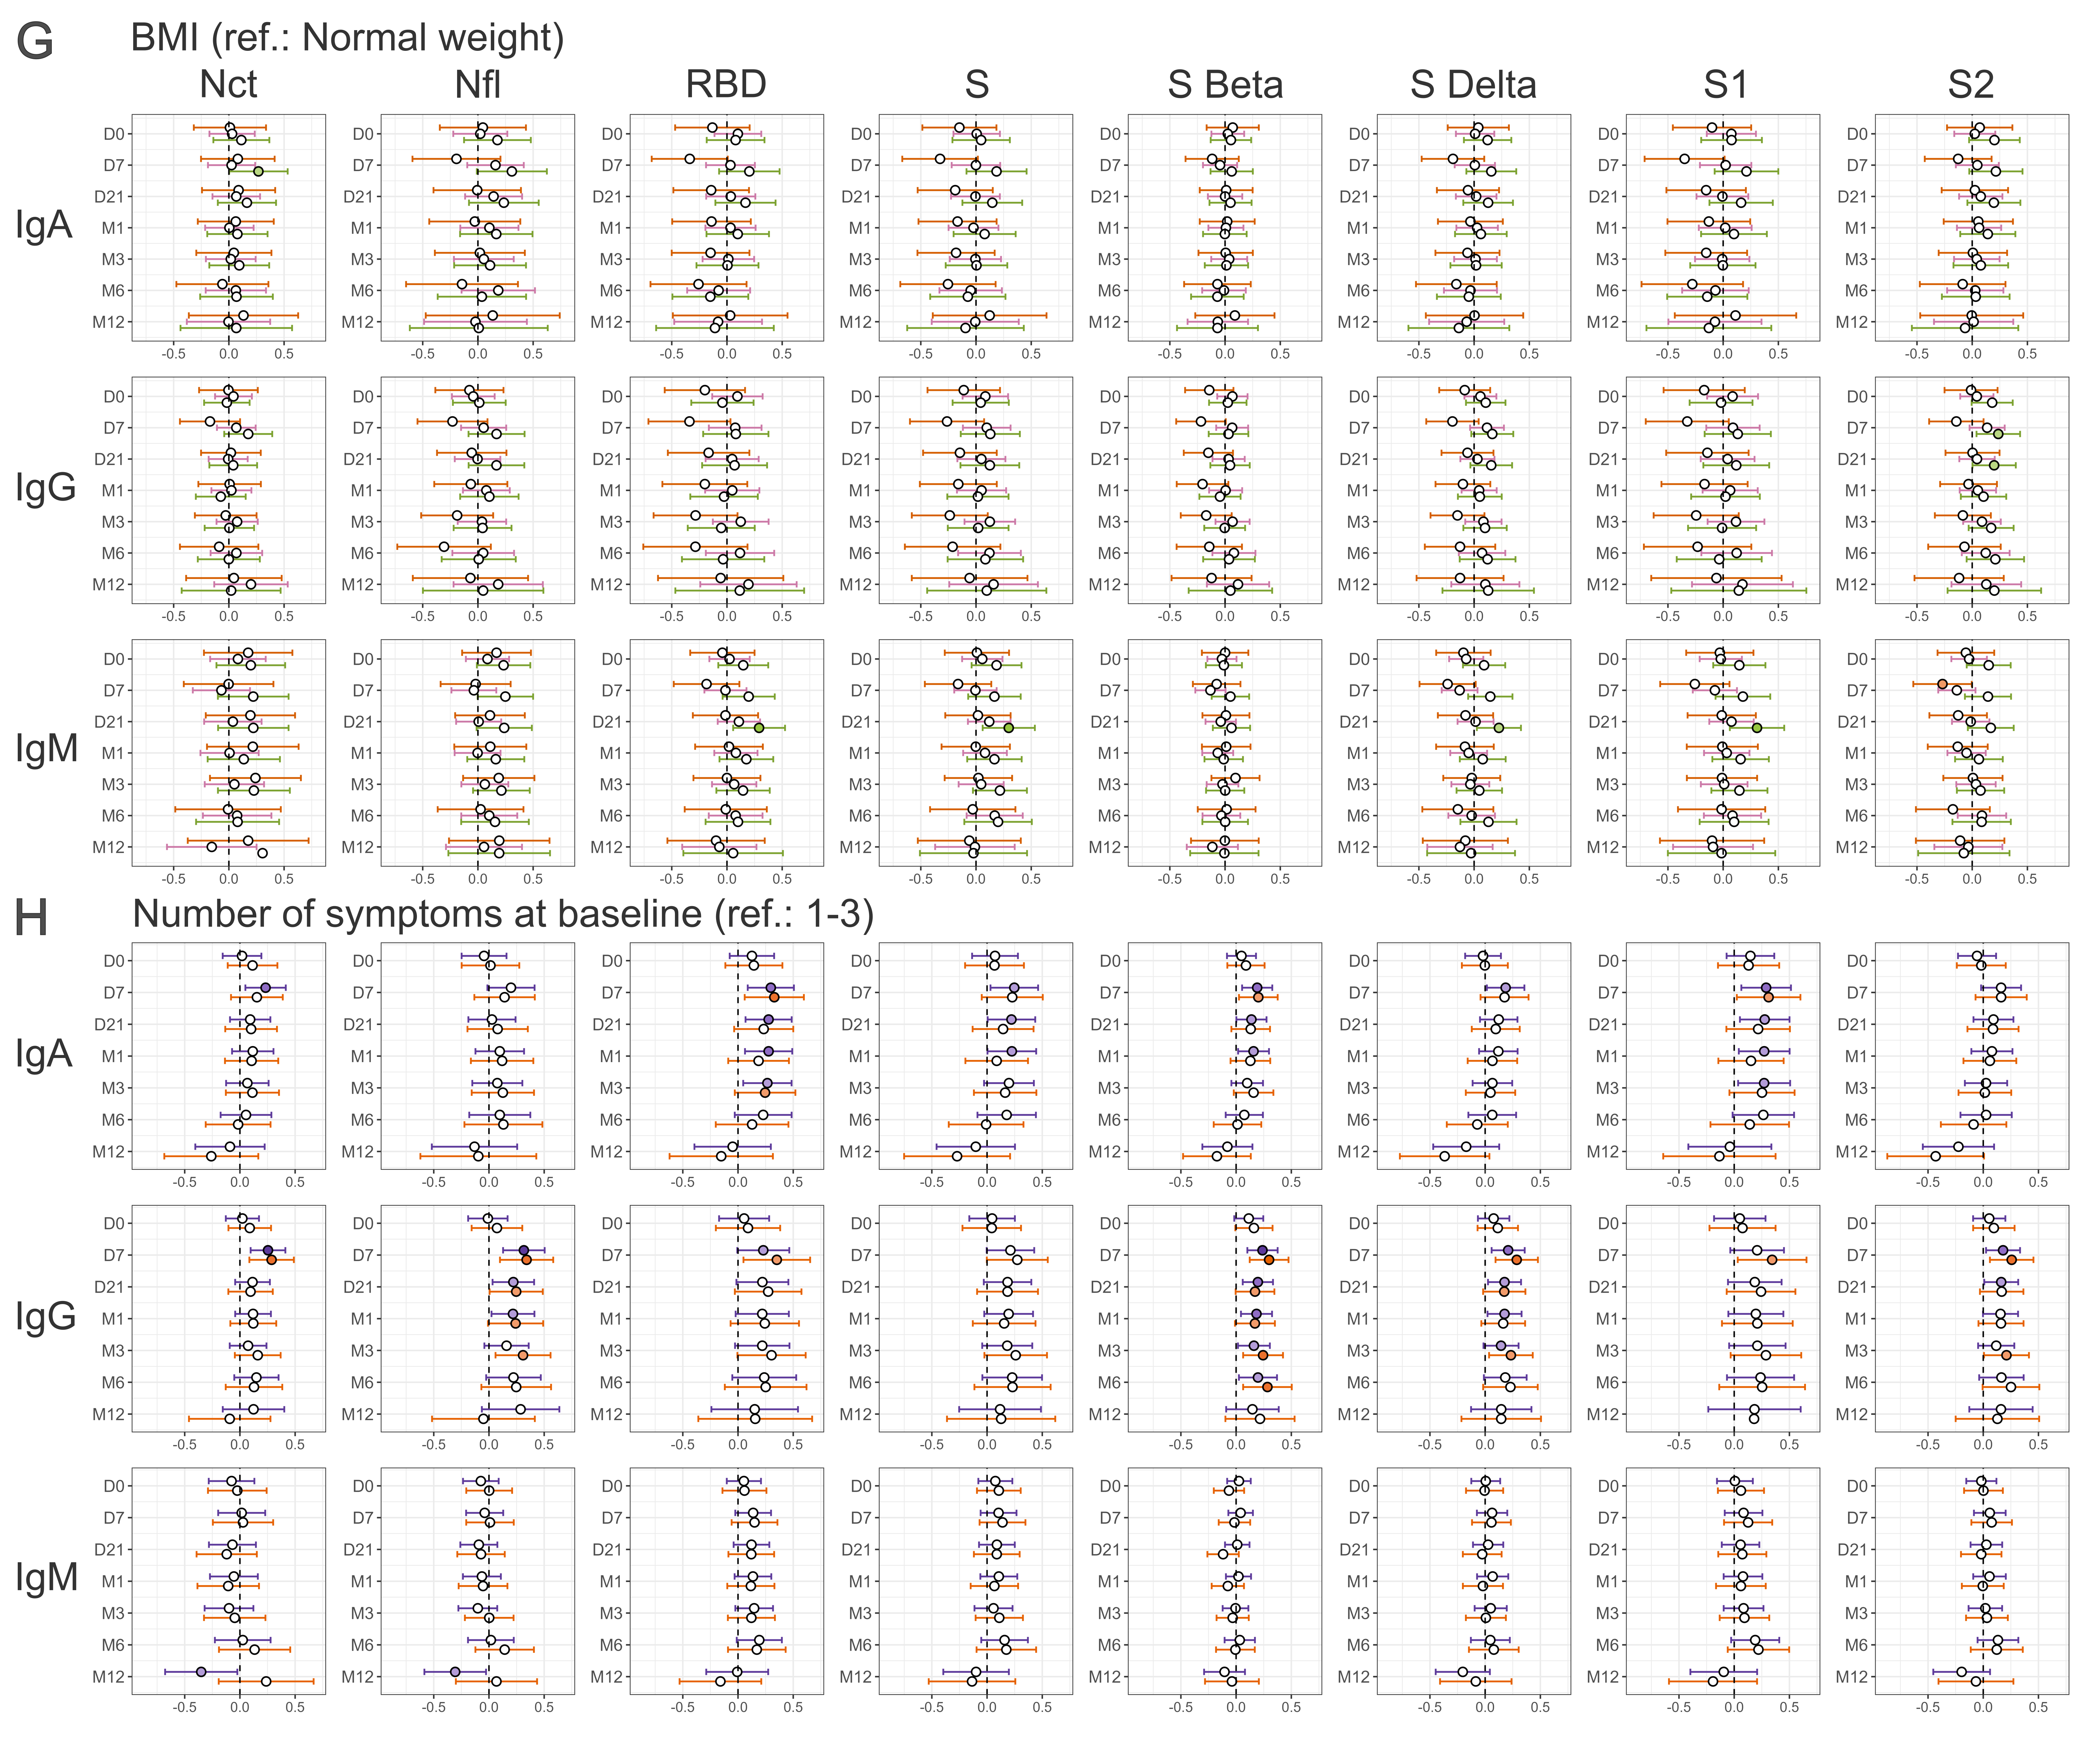


**Figure S 6 Forest plots showing the effects of clinical and demographic variables on antibody levels across 24 isotype-antigen combinations.**

Estimated coefficients (β) and 95% confidence intervals from linear mixed-effects models are shown for the following covariates: (A) seropositivity at baseline (blue: seropositive), (B) vaccination at baseline (blue: vaccinated individuals), (C) COVID-19 wave (yellow: wave 2 [Delta], blue: wave 3 [Omicron BA.1/BA.2], and magenta: wave 4 [Omicron BA.4/BA.5]), (D) site (orange: DC2, blue: ET1, purple: ET2, green: GH1, and pink: MZ1), (E) age (green: 25–40 years, blue: 40–60 years, and purple: >60 years), (F) sex (blue: female), (G) BMI (orange: underweight, pink: overweight, and green: obese), and (H) number of symptoms at baseline (purple: 4–6 and orange: >6). Models were adjusted for relevant mediators and confounders as defined in Suppl. Text S5. Estimates correspond to marginal means (dots) with 95% confidence intervals (error bars). Colored dots indicate statistical significance (p < 0.05), while white-filled dots denote non-significant associations. Baseline seropositivity and vaccination, later wave, and Ethiopian sites consistently show positive associations with antibody levels, while other covariates (e.g., age, sex, BMI) exhibit limited or no consistent effects


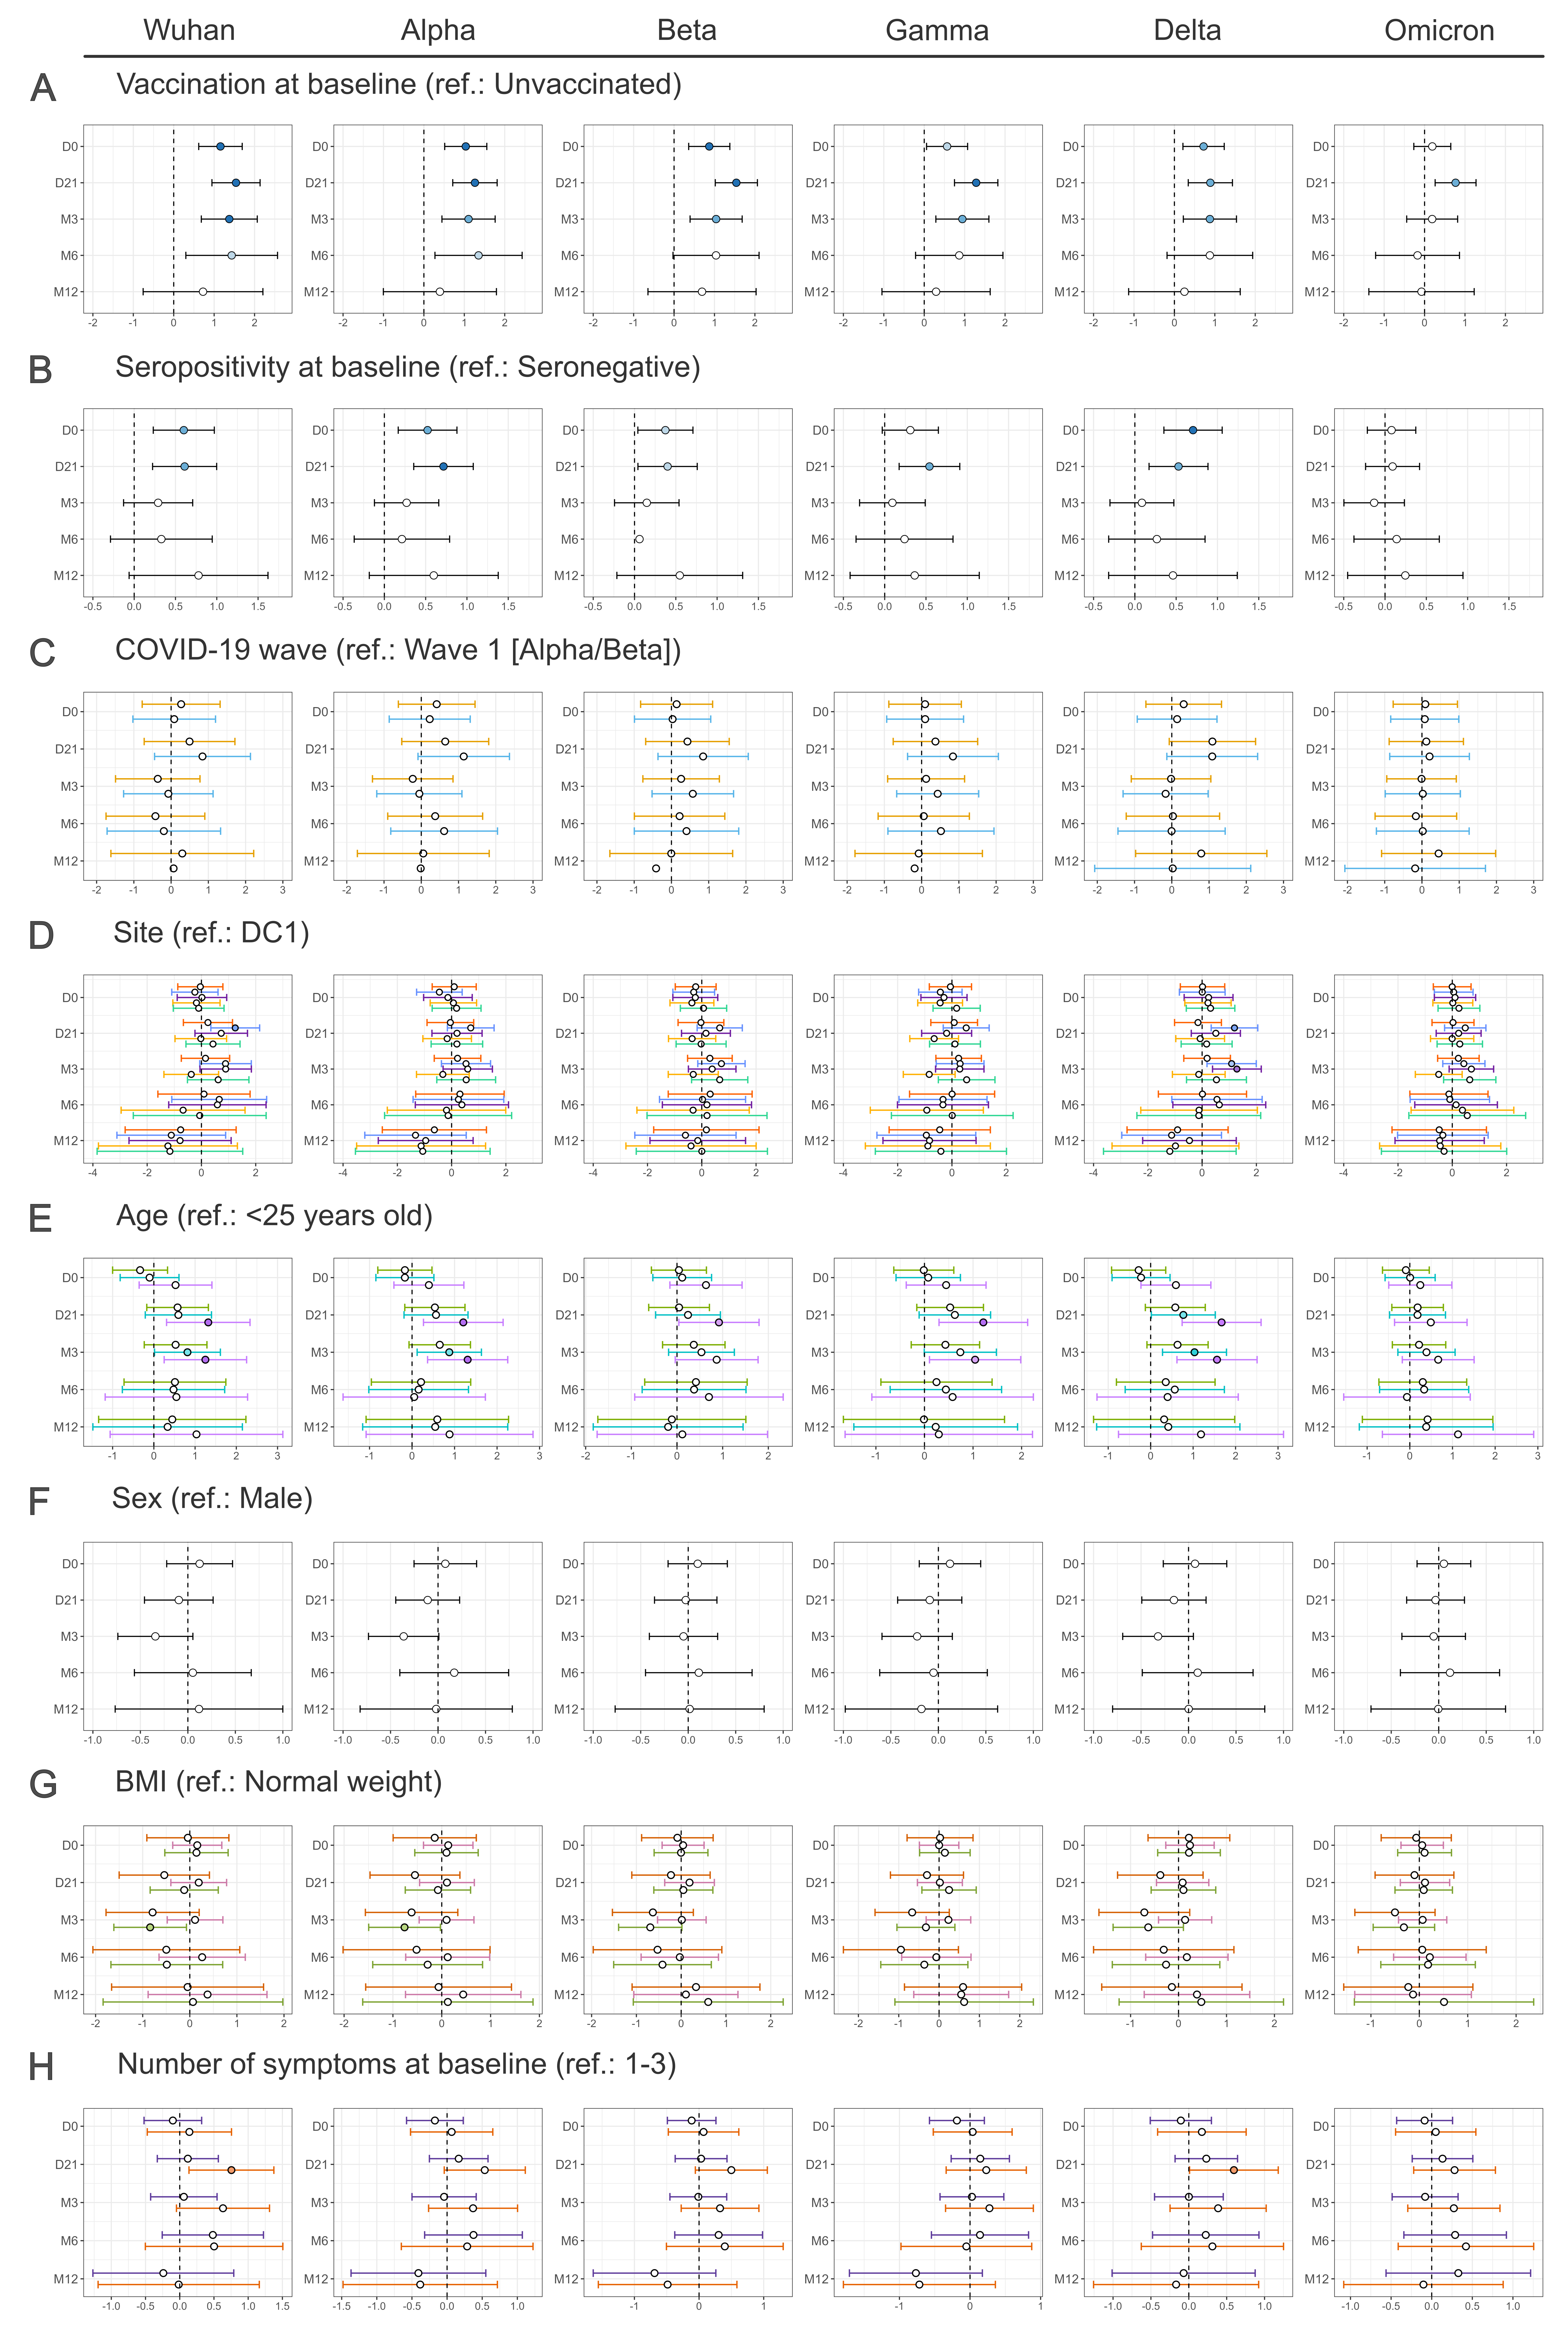


**Figure S 7 Forest plots showing the effects of clinical and demographic variables on neutralizing antibody responses across SARS-CoV-2 variants.**

Generalized linear mixed-effects models (GLMMs, beta distribution with logit link) were used to estimate the effects of key variables on neutralization levels against each SARS-CoV-2 variant (Wuhan, Alpha, Beta, Gamma, Delta, and Omicron): (A) vaccination at baseline (blue: vaccinated individuals), (B) seropositivity at baseline (blue: seropositive), (C) COVID-19 wave (yellow: wave 2 [Delta], blue: wave 3 [Omicron BA.1/BA.2], and magenta: wave 4 [Omicron BA.4/BA.5]), (D) site (orange: DC2, blue: ET1, purple: ET2, green: GH1, and pink: MZ1), (E) age (green: 25–40 years, blue: 40–60 years, and purple: >60 years), (F) sex (blue: female), (G) BMI (orange: underweight, pink: overweight, and green: obese), and (H) number of symptoms at baseline (purple: 4–6 and orange: >6). Analyses were performed separately per variant and adjusted for relevant confounders and mediators (see Suppl. Text S5). Marginal contrasts were derived from estimated marginal means. Point estimates (β) are shown with 95% confidence intervals. Colored points indicate statistically significant effects (p < 0.05); white-filled points indicate non-significance. Vaccination status showed the strongest positive association with neutralization, although baseline seropositivity, site, and age were also relevant for several variants.

**Table S 1 Complete demographic and clinical characteristics of participants included in the immunological analyses**.

Includes all individuals with available serology, neutralization, and/or T- and B-cell data, stratified by treatment group and disease severity.

|  |  | **SEROLOGY** | | | | | | | |
| --- | --- | --- | --- | --- | --- | --- | --- | --- | --- |
|  |  | **Mild/Moderate symptoms (N = 486)** | | | | | | **Asymptomatic (N = 27)** | **All** |
| **Variable** | **Levels** | **Paracetamol** | **Cicle-Nita** | **ASAQ-IVM** | **Fluoxetina** | **HIQ** | **Lopinavir** |
| N |  | 222 | 164 | 68 | 18 | 7 | 7 | 27 | 513 |
| Site | DC1 | 29 (13.06) | 13 (7.93) | 5 (7.35) | 0 (0) | 7 (100) | 7 (100) | 0 (0) | 61 (11.89) |
| DC2 | 29 (13.06) | 34 (20.73) | 14 (20.59) | 3 (16.67) | 0 (0) | 0 (0) | 0 (0) | 80 (15.59) |
| ET1 | 40 (18.02) | 37 (22.56) | 3 (4.41) | 0 (0) | 0 (0) | 0 (0) | 0 (0) | 80 (15.59) |
| ET2 | 29 (13.06) | 23 (14.02) | 19 (27.94) | 0 (0) | 0 (0) | 0 (0) | 0 (0) | 71 (13.84) |
| GH1 | 64 (28.83) | 30 (18.29) | 24 (35.29) | 15 (83.33) | 0 (0) | 0 (0) | 25 (92.59) | 158 (30.8) |
| MZ1 | 31 (13.96) | 27 (16.46) | 3 (4.41) | 0 (0) | 0 (0) | 0 (0) | 2 (7.41) | 63 (12.28) |
| Sex | Female | 114 (51.35) | 73 (44.51) | 37 (54.41) | 15 (83.33) | 1 (14.29) | 3 (42.86) | 16 (59.26) | 259 (50.49) |
| Male | 108 (48.65) | 91 (55.49) | 31 (45.59) | 3 (16.67) | 6 (85.71) | 4 (57.14) | 11 (40.74) | 254 (49.51) |
| Age | <25 | 32 (14.41) | 19 (11.59) | 16 (23.53) | 2 (11.11) | 0 (0) | 0 (0) | 8 (29.63) | 77 (15.01) |
| =25-40 | 112 (50.45) | 83 (50.61) | 30 (44.12) | 11 (61.11) | 5 (71.43) | 2 (28.57) | 8 (29.63) | 251 (48.93) |
| =40-60 | 62 (27.93) | 49 (29.88) | 15 (22.06) | 4 (22.22) | 2 (28.57) | 5 (71.43) | 6 (22.22) | 143 (27.88) |
| >=60 | 16 (7.21) | 13 (7.93) | 7 (10.29) | 1 (5.56) | 0 (0) | 0 (0) | 5 (18.52) | 42 (8.19) |
| BMI | Underweight [BMI<18.5] | 15 (6.76) | 11 (6.71) | 9 (13.24) | 0 (0) | 1 (14.29) | 0 (0) | 0 (0) | 36 (7.02) |
| Normal weight [18.5≥BMI<25] | 103 (46.4) | 87 (53.05) | 36 (52.94) | 1 (5.56) | 2 (28.57) | 3 (42.86) | 0 (0) | 232 (45.22) |
| Overweight [25≥BMI<30] | 63 (28.38) | 45 (27.44) | 12 (17.65) | 10 (55.56) | 2 (28.57) | 0 (0) | 0 (0) | 132 (25.73) |
| Obese [BMI≥30] | 41 (18.47) | 20 (12.2) | 11 (16.18) | 7 (38.89) | 2 (28.57) | 4 (57.14) | 0 (0) | 85 (16.57) |
| Unknown | 0 (0) | 1 (0.61) | 0 (0) | 0 (0) | 0 (0) | 0 (0) | 27 (100) | 28 (5.46) |
| COVID-19 vaccines at baseline | 0 | 146 (65.77) | 126 (76.83) | 42 (61.76) | 5 (27.78) | 7 (100) | 7 (100) | 5 (18.52) | 338 (65.89) |
| 1 | 16 (7.21) | 2 (1.22) | 3 (4.41) | 8 (44.44) | 0 (0) | 0 (0) | 0 (0) | 29 (5.65) |
| 2 | 31 (13.96) | 18 (10.98) | 7 (10.29) | 4 (22.22) | 0 (0) | 0 (0) | 0 (0) | 60 (11.7) |
| 3 | 3 (1.35) | 1 (0.61) | 0 (0) | 0 (0) | 0 (0) | 0 (0) | 0 (0) | 4 (0.78) |
| Unknown | 26 (11.71) | 17 (10.37) | 16 (23.53) | 1 (5.56) | 0 (0) | 0 (0) | 22 (81.48) | 82 (15.98) |
| COVID-19 vaccines during follow-up | 0 | 181 (81.53) | 133 (81.1) | 48 (70.59) | 15 (83.33) | 7 (100) | 7 (100) | 4 (14.81) | 395 (77) |
| 1 | 13 (5.86) | 11 (6.71) | 4 (5.88) | 2 (11.11) | 0 (0) | 0 (0) | 1 (3.7) | 31 (6.04) |
| 2 | 2 (0.9) | 3 (1.83) | 0 (0) | 0 (0) | 0 (0) | 0 (0) | 0 (0) | 5 (0.97) |
| Unknown | 26 (11.71) | 17 (10.37) | 16 (23.53) | 1 (5.56) | 0 (0) | 0 (0) | 22 (81.48) | 82 (15.98) |
| Malnutrition at baseline | Yes | 2 (0.9) | 3 (1.83) | 1 (1.47) | 0 (0) | 0 (0) | 0 (0) | 0 (0) | 6 (1.17) |
| No | 219 (98.65) | 158 (96.34) | 67 (98.53) | 18 (100) | 5 (71.43) | 6 (85.71) | 0 (0) | 473 (92.2) |
| Unknown | 1 (0.45) | 3 (1.83) | 0 (0) | 0 (0) | 2 (28.57) | 1 (14.29) | 27 (100) | 34 (6.63) |
| Malnutrition at M1 | Yes | 1 (0.45) | 0 (0) | 0 (0) | 0 (0) | 0 (0) | 0 (0) | 0 (0) | 1 (0.19) |
| No | 185 (83.33) | 128 (78.05) | 59 (86.76) | 17 (94.44) | 5 (71.43) | 4 (57.14) | 27 (100) | 425 (82.85) |
| Unknown | 36 (16.22) | 36 (21.95) | 9 (13.24) | 1 (5.56) | 2 (28.57) | 3 (42.86) | 0 (0) | 87 (16.96) |
| Malnutrition at M3 | Yes | 0 (0) | 0 (0) | 0 (0) | 0 (0) | 0 (0) | 0 (0) | 0 (0) | 0 (0) |
| No | 174 (78.38) | 125 (76.22) | 58 (85.29) | 16 (88.89) | 7 (100) | 5 (71.43) | 19 (70.37) | 404 (78.75) |
| Unknown | 48 (21.62) | 39 (23.78) | 10 (14.71) | 2 (11.11) | 0 (0) | 2 (28.57) | 8 (29.63) | 109 (21.25) |
| Malnutrition at M6 | Yes | 0 (0) | 1 (0.61) | 0 (0) | 0 (0) | 0 (0) | 0 (0) | 1 (3.7) | 2 (0.39) |
| No | 126 (56.76) | 104 (63.41) | 45 (66.18) | 4 (22.22) | 5 (71.43) | 5 (71.43) | 16 (59.26) | 305 (59.45) |
| Unknown | 96 (43.24) | 59 (35.98) | 23 (33.82) | 14 (77.78) | 2 (28.57) | 2 (28.57) | 10 (37.04) | 206 (40.16) |
| Malnutrition at M12 | Yes | 2 (0.9) | 0 (0) | 0 (0) | 0 (0) | 0 (0) | 0 (0) | 0 (0) | 2 (0.39) |
| No | 94 (42.34) | 82 (50) | 12 (17.65) | 0 (0) | 6 (85.71) | 5 (71.43) | 13 (48.15) | 212 (41.33) |
| Unknown | 126 (56.76) | 82 (50) | 56 (82.35) | 18 (100) | 1 (14.29) | 2 (28.57) | 14 (51.85) | 299 (58.28) |
| HIV at baseline | Yes | 9 (4.05) | 4 (2.44) | 2 (2.94) | 0 (0) | 0 (0) | 0 (0) | 0 (0) | 15 (2.92) |
| No | 211 (95.05) | 160 (97.56) | 66 (97.06) | 18 (100) | 7 (100) | 7 (100) | 0 (0) | 469 (91.42) |
| Unknown | 2 (0.9) | 0 (0) | 0 (0) | 0 (0) | 0 (0) | 0 (0) | 27 (100) | 29 (5.65) |
| HIV at M1 | Yes | 0 (0) | 0 (0) | 0 (0) | 0 (0) | 0 (0) | 0 (0) | 2 (7.41) | 2 (0.39) |
| No | 186 (83.78) | 130 (79.27) | 59 (86.76) | 17 (94.44) | 5 (71.43) | 4 (57.14) | 25 (92.59) | 426 (83.04) |
| Unknown | 36 (16.22) | 34 (20.73) | 9 (13.24) | 1 (5.56) | 2 (28.57) | 3 (42.86) | 0 (0) | 85 (16.57) |
| HIV at M3 | Yes | 0 (0) | 0 (0) | 0 (0) | 0 (0) | 0 (0) | 0 (0) | 0 (0) | 0 (0) |
| No | 174 (78.38) | 126 (76.83) | 58 (85.29) | 16 (88.89) | 7 (100) | 5 (71.43) | 19 (70.37) | 405 (78.95) |
| Unknown | 48 (21.62) | 38 (23.17) | 10 (14.71) | 2 (11.11) | 0 (0) | 2 (28.57) | 8 (29.63) | 108 (21.05) |
| HIV at M12 | Yes | 0 (0) | 0 (0) | 0 (0) | 0 (0) | 0 (0) | 0 (0) | 0 (0) | 0 (0) |
| No | 96 (43.24) | 82 (50) | 13 (19.12) | 0 (0) | 6 (85.71) | 5 (71.43) | 13 (48.15) | 215 (41.91) |
| Unknown | 126 (56.76) | 82 (50) | 55 (80.88) | 18 (100) | 1 (14.29) | 2 (28.57) | 14 (51.85) | 298 (58.09) |
| Tuberculosis at baseline | Yes | 0 (0) | 0 (0) | 1 (1.47) | 0 (0) | 0 (0) | 0 (0) | 0 (0) | 1 (0.19) |
| No | 220 (99.1) | 163 (99.39) | 67 (98.53) | 18 (100) | 7 (100) | 7 (100) | 27 (100) | 509 (99.22) |
| Unknown | 2 (0.9) | 1 (0.61) | 0 (0) | 0 (0) | 0 (0) | 0 (0) | 0 (0) | 3 (0.58) |
| Tuberculosis at M1 | Yes | 0 (0) | 0 (0) | 1 (1.47) | 0 (0) | 0 (0) | 0 (0) | 0 (0) | 1 (0.19) |
| No | 186 (83.78) | 130 (79.27) | 58 (85.29) | 17 (94.44) | 5 (71.43) | 4 (57.14) | 27 (100) | 427 (83.24) |
| Unknown | 36 (16.22) | 34 (20.73) | 9 (13.24) | 1 (5.56) | 2 (28.57) | 3 (42.86) | 0 (0) | 85 (16.57) |
| Tuberculosis at M3 | Yes | 0 (0) | 0 (0) | 1 (1.47) | 0 (0) | 0 (0) | 0 (0) | 0 (0) | 1 (0.19) |
| No | 174 (78.38) | 126 (76.83) | 57 (83.82) | 16 (88.89) | 7 (100) | 5 (71.43) | 19 (70.37) | 404 (78.75) |
| Unknown | 48 (21.62) | 38 (23.17) | 10 (14.71) | 2 (11.11) | 0 (0) | 2 (28.57) | 8 (29.63) | 108 (21.05) |
| Tuberculosis at M12 | Yes | 0 (0) | 0 (0) | 0 (0) | 0 (0) | 0 (0) | 0 (0) | 0 (0) | 0 (0) |
| No | 96 (43.24) | 82 (50) | 13 (19.12) | 0 (0) | 6 (85.71) | 5 (71.43) | 13 (48.15) | 215 (41.91) |
| Unknown | 126 (56.76) | 82 (50) | 55 (80.88) | 18 (100) | 1 (14.29) | 2 (28.57) | 14 (51.85) | 298 (58.09) |
| Malaria at baseline | Yes | 4 (1.8) | 3 (1.83) | 0 (0) | 0 (0) | 0 (0) | 0 (0) | 0 (0) | 7 (1.36) |
| No | 206 (92.79) | 148 (90.24) | 66 (97.06) | 18 (100) | 6 (85.71) | 6 (85.71) | 0 (0) | 450 (87.72) |
| Unknown | 12 (5.41) | 13 (7.93) | 2 (2.94) | 0 (0) | 1 (14.29) | 1 (14.29) | 27 (100) | 56 (10.92) |
| Malaria at M1 | Yes | 1 (0.45) | 0 (0) | 0 (0) | 0 (0) | 0 (0) | 0 (0) | 1 (3.7) | 2 (0.39) |
| No | 180 (81.08) | 126 (76.83) | 56 (82.35) | 17 (94.44) | 5 (71.43) | 4 (57.14) | 25 (92.59) | 413 (80.51) |
| Unknown | 41 (18.47) | 38 (23.17) | 12 (17.65) | 1 (5.56) | 2 (28.57) | 3 (42.86) | 1 (3.7) | 98 (19.1) |
| Malaria at M3 | Yes | 0 (0) | 0 (0) | 1 (1.47) | 0 (0) | 0 (0) | 1 (14.29) | 1 (3.7) | 3 (0.58) |
| No | 168 (75.68) | 121 (73.78) | 52 (76.47) | 16 (88.89) | 6 (85.71) | 4 (57.14) | 16 (59.26) | 383 (74.66) |
| Unknown | 54 (24.32) | 43 (26.22) | 15 (22.06) | 2 (11.11) | 1 (14.29) | 2 (28.57) | 10 (37.04) | 127 (24.76) |
| Malaria at M12 | Yes | 2 (0.9) | 2 (1.22) | 0 (0) | 0 (0) | 0 (0) | 1 (14.29) | 5 (18.52) | 10 (1.95) |
| No | 92 (41.44) | 76 (46.34) | 12 (17.65) | 0 (0) | 6 (85.71) | 4 (57.14) | 4 (14.81) | 194 (37.82) |
| Unknown | 128 (57.66) | 86 (52.44) | 56 (82.35) | 18 (100) | 1 (14.29) | 2 (28.57) | 18 (66.67) | 309 (60.23) |
| COVID-19 symptoms at baseline | 1-3 | 99 (44.59) | 78 (47.56) | 21 (30.88) | 3 (16.67) | 5 (71.43) | 4 (57.14) | 0 (0) | 210 (40.94) |
| 4-6 | 80 (36.04) | 62 (37.8) | 30 (44.12) | 12 (66.67) | 1 (14.29) | 2 (28.57) | 0 (0) | 187 (36.45) |
| >6 | 43 (19.37) | 24 (14.63) | 17 (25) | 3 (16.67) | 1 (14.29) | 1 (14.29) | 0 (0) | 89 (17.35) |
| Unknown | 0 (0) | 0 (0) | 0 (0) | 0 (0) | 0 (0) | 0 (0) | 27 (100) | 27 (5.26) |
| COVID-19 symptoms group | No symp from D7 | 55 (24.77) | 42 (25.61) | 21 (30.88) | 2 (11.11) | 2 (28.57) | 4 (57.14) | 0 (0) | 126 (24.56) |
| No symp from D14 | 56 (25.23) | 46 (28.05) | 27 (39.71) | 2 (11.11) | 5 (71.43) | 2 (28.57) | 0 (0) | 138 (26.9) |
| No symp from D21 | 59 (26.58) | 37 (22.56) | 9 (13.24) | 5 (27.78) | 0 (0) | 1 (14.29) | 0 (0) | 111 (21.64) |
| still symp at D21 | 52 (23.42) | 39 (23.78) | 11 (16.18) | 9 (50) | 0 (0) | 0 (0) | 0 (0) | 111 (21.64) |
| Unknown | 0 (0) | 0 (0) | 0 (0) | 0 (0) | 0 (0) | 0 (0) | 27 (100) | 27 (5.26) |
| COVID-19 wave | Wave 1 – Alpha/Beta | 12 (5.41) | 7 (4.27) | 0 (0) | 0 (0) | 7 (100) | 7 (100) | 0 (0) | 33 (6.43) |
| Wave 2 – Delta | 120 (54.05) | 106 (64.63) | 4 (5.88) | 0 (0) | 0 (0) | 0 (0) | 21 (77.78) | 251 (48.93) |
| Wave 3 – Omicron BA.1/BA.2 | 46 (20.72) | 51 (31.1) | 22 (32.35) | 0 (0) | 0 (0) | 0 (0) | 1 (3.7) | 120 (23.39) |
| Wave 4 – Omicron BA.4/BA.5 | 44 (19.82) | 0 (0) | 42 (61.76) | 18 (100) | 0 (0) | 0 (0) | 5 (18.52) | 109 (21.25) |
| Hospitalization | Yes | 0 (0) | 0 (0) | 0 (0) | 0 (0) | 0 (0) | 0 (0) | 0 (0) | 0 (0) |
| No | 222 (100) | 164 (100) | 68 (100) | 18 (100) | 7 (100) | 7 (100) | 27 (100) | 513 (100) |
| Death | Yes | 0 (0) | 0 (0) | 1 (1.47) | 0 (0) | 0 (0) | 0 (0) | 0 (0) | 1 (0.19) |
| No | 222 (100) | 164 (100) | 67 (98.53) | 18 (100) | 7 (100) | 7 (100) | 27 (100) | 512 (99.81) |
| Medical events | Yes | 0 (0) | 0 (0) | 1 (1.47) | 0 (0) | 0 (0) | 0 (0) | 0 (0) | 1 (0.19) |
| No | 217 (97.75) | 164 (100) | 67 (98.53) | 18 (100) | 0 (0) | 0 (0) | 27 (100) | 493 (96.1) |
| Unknown | 5 (2.25) | 0 (0) | 0 (0) | 0 (0) | 7 (100) | 7 (100) | 0 (0) | 19 (3.7) |
| SpO2 | <= 93 | 1 (0.45) | 1 (0.61) | 0 (0) | 0 (0) | 0 (0) | 0 (0) | 0 (0) | 2 (0.39) |
| > 93 | 221 (99.55) | 163 (99.39) | 68 (100) | 18 (100) | 7 (100) | 7 (100) | 0 (0) | 484 (94.35) |
| Unknown | 0 (0) | 0 (0) | 0 (0) | 0 (0) | 0 (0) | 0 (0) | 27 (100) | 27 (5.26) |
| Physical exam at baseline | Normal | 217 (97.75) | 152 (92.68) | 66 (97.06) | 18 (100) | 7 (100) | 7 (100) | 0 (0) | 467 (91.03) |
| Abnormal not significant | 4 (1.8) | 10 (6.1) | 2 (2.94) | 0 (0) | 0 (0) | 0 (0) | 0 (0) | 16 (3.12) |
| Abnormal significant | 1 (0.45) | 1 (0.61) | 0 (0) | 0 (0) | 0 (0) | 0 (0) | 0 (0) | 2 (0.39) |
| Unknown | 0 (0) | 1 (0.61) | 0 (0) | 0 (0) | 0 (0) | 0 (0) | 27 (100) | 28 (5.46) |
| Physical exam at M1 | Normal | 180 (81.08) | 127 (77.44) | 57 (83.82) | 17 (94.44) | 5 (71.43) | 4 (57.14) | 26 (96.3) | 416 (81.09) |
| Abnormal not significant | 6 (2.7) | 3 (1.83) | 1 (1.47) | 0 (0) | 0 (0) | 0 (0) | 1 (3.7) | 11 (2.14) |
| Abnormal significant | 0 (0) | 0 (0) | 1 (1.47) | 0 (0) | 0 (0) | 0 (0) | 0 (0) | 1 (0.19) |
| Unknown | 36 (16.22) | 34 (20.73) | 9 (13.24) | 1 (5.56) | 2 (28.57) | 3 (42.86) | 0 (0) | 85 (16.57) |
| Physical exam at M3 | Normal | 174 (78.38) | 124 (75.61) | 56 (82.35) | 16 (88.89) | 7 (100) | 5 (71.43) | 19 (70.37) | 401 (78.17) |
| Abnormal not significant | 0 (0) | 2 (1.22) | 1 (1.47) | 0 (0) | 0 (0) | 0 (0) | 0 (0) | 3 (0.58) |
| Abnormal significant | 0 (0) | 0 (0) | 1 (1.47) | 0 (0) | 0 (0) | 0 (0) | 0 (0) | 1 (0.19) |
| Unknown | 48 (21.62) | 38 (23.17) | 10 (14.71) | 2 (11.11) | 0 (0) | 2 (28.57) | 8 (29.63) | 108 (21.05) |
| Physical exam at M6 | Normal | 127 (57.21) | 105 (64.02) | 45 (66.18) | 4 (22.22) | 5 (71.43) | 5 (71.43) | 17 (62.96) | 308 (60.04) |
| Abnormal not significant | 0 (0) | 0 (0) | 0 (0) | 0 (0) | 0 (0) | 0 (0) | 0 (0) | 0 (0) |
| Abnormal significant | 0 (0) | 0 (0) | 0 (0) | 0 (0) | 0 (0) | 0 (0) | 0 (0) | 0 (0) |
| Unknown | 95 (42.79) | 59 (35.98) | 23 (33.82) | 14 (77.78) | 2 (28.57) | 2 (28.57) | 10 (37.04) | 205 (39.96) |
| Physical exam at M12 | Normal | 95 (42.79) | 81 (49.39) | 12 (17.65) | 0 (0) | 6 (85.71) | 5 (71.43) | 13 (48.15) | 212 (41.33) |
| Abnormal not significant | 0 (0) | 0 (0) | 0 (0) | 0 (0) | 0 (0) | 0 (0) | 0 (0) | 0 (0) |
| Abnormal significant | 1 (0.45) | 1 (0.61) | 0 (0) | 0 (0) | 0 (0) | 0 (0) | 0 (0) | 2 (0.39) |
| Unknown | 126 (56.76) | 82 (50) | 56 (82.35) | 18 (100) | 1 (14.29) | 2 (28.57) | 14 (51.85) | 299 (58.28) |
| Comorbidities | Hypertension | 23 | 15 | 10 | 4 | 0 | 0 | 0 | 52 |
| Asthma | 8 | 4 | 2 | 0 | 0 | 2 | 0 | 16 |
| Diabetes Mellitus (type 1) | 2 | 0 | 1 | 0 | 1 | 0 | 0 | 4 |
| Diabetes Mellitus (type 2) | 5 | 7 | 3 | 1 | 0 | 0 | 0 | 16 |
| Uncontrolled HIV or known CD4 < 200/mm3 | 4 | 1 | 1 | 0 | 0 | 0 | 0 | 6 |
| Heart failure | 1 | 0 | 1 | 0 | 0 | 0 | 0 | 2 |
| Sickle cell disease | 0 | 0 | 1 | 1 | 0 | 0 | 0 | 2 |
| Acquired Cardiomyopathy | 0 | 1 | 0 | 0 | 0 | 0 | 0 | 1 |
| Immunosuppressive treatment | 0 | 1 | 0 | 0 | 0 | 0 | 0 | 1 |
| Post-Tuberculosis fibrosis/Aspergilloma | 1 | 0 | 0 | 0 | 0 | 0 | 0 | 1 |
| Pulmonary fibrosis | 1 | 0 | 0 | 0 | 0 | 0 | 0 | 1 |
| Stroke | 0 | 1 | 0 | 0 | 0 | 0 | 0 | 1 |
| Samples available per tp | D0 | 215 | 157 | 66 | 18 | 7 | 7 | 0 | 470 |
| D7 | 187 | 137 | 60 | 16 | 5 | 4 | 0 | 409 |
| D21 | 187 | 137 | 63 | 16 | 6 | 7 | 0 | 416 |
| M1 | 169 | 127 | 54 | 17 | 5 | 3 | 27 | 402 |
| M3 | 165 | 113 | 56 | 15 | 6 | 5 | 18 | 378 |
| M6 | 116 | 97 | 43 | 4 | 5 | 5 | 16 | 286 |
| M12 | 88 | 74 | 7 | 0 | 6 | 5 | 13 | 193 |
| UNS | 0 | 3 | 0 | 0 | 0 | 0 | 0 | 3 |
| Samples available per individual | 8 | 0 | 2 | 0 | 0 | 0 | 0 | 0 | 2 |
| 7 | 47 | 47 | 4 | 0 | 0 | 2 | 0 | 100 |
| 6 | 62 | 37 | 29 | 4 | 5 | 1 | 0 | 138 |
| 5 | 44 | 32 | 16 | 9 | 2 | 2 | 0 | 105 |
| 4 | 27 | 15 | 12 | 2 | 0 | 0 | 10 | 66 |
| 3 | 22 | 10 | 5 | 3 | 0 | 2 | 6 | 48 |
| 2 | 12 | 7 | 2 | 0 | 0 | 0 | 5 | 26 |
| 1 | 8 | 14 | 0 | 0 | 0 | 0 | 6 | 28 |

|  |  | **NEUTRALIZATION** | | | **T-cells** | | | **B-cells** | | |
| --- | --- | --- | --- | --- | --- | --- | --- | --- | --- | --- |
|  |  | **Mild/Moderate symptoms** | | **All** | **Mild/Moderate symptoms** | | **All** | **Mild/Moderate symptoms** | | **All** |
| **Variable** | **Levels** | **Paracetamol** | **Cicle-Nita** | **Paracetamol** | **Cicle-Nita** | **Paracetamol** | **Cicle-Nita** |
| N |  | 117 | 115 | 232 | 51 | 53 | 104 | 41 | 41 | 82 |
| Site | DC1 | 17 (14.53) | 9 (7.83) | 26 (11.21) | 8 (15.69) | 4 (7.55) | 12 (11.54) | 5 (12.2) | 2 (4.88) | 7 (8.54) |
| DC2 | 20 (17.09) | 25 (21.74) | 45 (19.4) | 4 (7.84) | 11 (20.75) | 15 (14.42) | 3 (7.32) | 10 (24.39) | 13 (15.85) |
| ET1 | 22 (18.8) | 25 (21.74) | 47 (20.26) | 6 (11.76) | 8 (15.09) | 14 (13.46) | 6 (14.63) | 8 (19.51) | 14 (17.07) |
| ET2 | 14 (11.97) | 15 (13.04) | 29 (12.5) | 5 (9.8) | 4 (7.55) | 9 (8.65) | 5 (12.2) | 2 (4.88) | 7 (8.54) |
| GH1 | 27 (23.08) | 24 (20.87) | 51 (21.98) | 11 (21.57) | 9 (16.98) | 20 (19.23) | 10 (24.39) | 7 (17.07) | 17 (20.73) |
| MZ1 | 17 (14.53) | 17 (14.78) | 34 (14.66) | 17 (33.33) | 17 (32.08) | 34 (32.69) | 12 (29.27) | 12 (29.27) | 24 (29.27) |
| Sex | Female | 57 (48.72) | 54 (46.96) | 111 (47.84) | 27 (52.94) | 23 (43.4) | 50 (48.08) | 23 (56.1) | 19 (46.34) | 42 (51.22) |
| Male | 60 (51.28) | 61 (53.04) | 121 (52.16) | 24 (47.06) | 30 (56.6) | 54 (51.92) | 18 (43.9) | 22 (53.66) | 40 (48.78) |
| Age | <25 | 14 (11.97) | 15 (13.04) | 29 (12.5) | 5 (9.8) | 3 (5.66) | 8 (7.69) | 4 (9.76) | 1 (2.44) | 5 (6.1) |
| =25-40 | 54 (46.15) | 53 (46.09) | 107 (46.12) | 24 (47.06) | 28 (52.83) | 52 (50) | 20 (48.78) | 22 (53.66) | 42 (51.22) |
| =40-60 | 36 (30.77) | 39 (33.91) | 75 (32.33) | 19 (37.25) | 21 (39.62) | 40 (38.46) | 16 (39.02) | 17 (41.46) | 33 (40.24) |
| >=60 | 13 (11.11) | 8 (6.96) | 21 (9.05) | 3 (5.88) | 1 (1.89) | 4 (3.85) | 1 (2.44) | 1 (2.44) | 2 (2.44) |
| BMI | Underweight [BMI<18.5] | 11 (9.4) | 7 (6.09) | 18 (7.76) | 3 (5.88) | 3 (5.66) | 6 (5.77) | 2 (4.88) | 2 (4.88) | 4 (4.88) |
| Normal weight [18.5≥BMI<25] | 55 (47.01) | 60 (52.17) | 115 (49.57) | 20 (39.22) | 22 (41.51) | 42 (40.38) | 17 (41.46) | 16 (39.02) | 33 (40.24) |
| Overweight [25≥BMI<30] | 32 (27.35) | 30 (26.09) | 62 (26.72) | 18 (35.29) | 19 (35.85) | 37 (35.58) | 13 (31.71) | 15 (36.59) | 28 (34.15) |
| Obese [BMI≥30] | 19 (16.24) | 17 (14.78) | 36 (15.52) | 10 (19.61) | 8 (15.09) | 18 (17.31) | 9 (21.95) | 7 (17.07) | 16 (19.51) |
| Unknown | 0 (0) | 1 (0.87) | 1 (0.43) | 0 (0) | 1 (1.89) | 1 (0.96) | 0 (0) | 1 (2.44) | 1 (1.22) |
| COVID-19 vaccines at baseline | 0 | 81 (69.23) | 88 (76.52) | 169 (72.84) | 32 (62.75) | 40 (75.47) | 72 (69.23) | 25 (60.98) | 31 (75.61) | 56 (68.29) |
| 1 | 8 (6.84) | 2 (1.74) | 10 (4.31) | 5 (9.8) | 2 (3.77) | 7 (6.73) | 4 (9.76) | 2 (4.88) | 6 (7.32) |
| 2 | 15 (12.82) | 14 (12.17) | 29 (12.5) | 6 (11.76) | 9 (16.98) | 15 (14.42) | 4 (9.76) | 7 (17.07) | 11 (13.41) |
| 3 | 1 (0.85) | 1 (0.87) | 2 (0.86) | 1 (1.96) | 0 (0) | 1 (0.96) | 1 (2.44) | 0 (0) | 1 (1.22) |
| Unknown | 12 (10.26) | 10 (8.7) | 22 (9.48) | 7 (13.73) | 2 (3.77) | 9 (8.65) | 7 (17.07) | 1 (2.44) | 8 (9.76) |
| COVID-19 vaccines during follow-up | 0 | 92 (78.63) | 92 (80) | 184 (79.31) | 36 (70.59) | 44 (83.02) | 80 (76.92) | 28 (68.29) | 35 (85.37) | 63 (76.83) |
| 1 | 11 (9.4) | 10 (8.7) | 21 (9.05) | 7 (13.73) | 5 (9.43) | 12 (11.54) | 5 (12.2) | 4 (9.76) | 9 (10.98) |
| 2 | 2 (1.71) | 3 (2.61) | 5 (2.16) | 1 (1.96) | 2 (3.77) | 3 (2.88) | 1 (2.44) | 1 (2.44) | 2 (2.44) |
| Unknown | 12 (10.26) | 10 (8.7) | 22 (9.48) | 7 (13.73) | 2 (3.77) | 9 (8.65) | 7 (17.07) | 1 (2.44) | 8 (9.76) |
| Malnutrition at baseline | Yes | 1 (0.85) | 2 (1.74) | 3 (1.29) | 0 (0) | 1 (1.89) | 1 (0.96) | 0 (0) | 1 (2.44) | 1 (1.22) |
| No | 116 (99.15) | 110 (95.65) | 226 (97.41) | 51 (100) | 51 (96.23) | 102 (98.08) | 41 (100) | 39 (95.12) | 80 (97.56) |
| Unknown | 0 (0) | 3 (2.61) | 3 (1.29) | 0 (0) | 1 (1.89) | 1 (0.96) | 0 (0) | 1 (2.44) | 1 (1.22) |
| Malnutrition at M1 | Yes | 1 (0.85) | 0 (0) | 1 (0.43) | 0 (0) | 0 (0) | 0 (0) | 0 (0) | 0 (0) | 0 (0) |
| No | 106 (90.6) | 102 (88.7) | 208 (89.66) | 46 (90.2) | 46 (86.79) | 92 (88.46) | 36 (87.8) | 36 (87.8) | 72 (87.8) |
| Unknown | 10 (8.55) | 13 (11.3) | 23 (9.91) | 5 (9.8) | 7 (13.21) | 12 (11.54) | 5 (12.2) | 5 (12.2) | 10 (12.2) |
| Malnutrition at M3 | Yes | 0 (0) | 0 (0) | 0 (0) | 0 (0) | 0 (0) | 0 (0) | 0 (0) | 0 (0) | 0 (0) |
| No | 103 (88.03) | 102 (88.7) | 205 (88.36) | 43 (84.31) | 44 (83.02) | 87 (83.65) | 34 (82.93) | 35 (85.37) | 69 (84.15) |
| Unknown | 14 (11.97) | 13 (11.3) | 27 (11.64) | 8 (15.69) | 9 (16.98) | 17 (16.35) | 7 (17.07) | 6 (14.63) | 13 (15.85) |
| Malnutrition at M6 | Yes | 0 (0) | 1 (0.87) | 1 (0.43) | 0 (0) | 0 (0) | 0 (0) | 0 (0) | 0 (0) | 0 (0) |
| No | 79 (67.52) | 86 (74.78) | 165 (71.12) | 34 (66.67) | 34 (64.15) | 68 (65.38) | 25 (60.98) | 28 (68.29) | 53 (64.63) |
| Unknown | 38 (32.48) | 28 (24.35) | 66 (28.45) | 17 (33.33) | 19 (35.85) | 36 (34.62) | 16 (39.02) | 13 (31.71) | 29 (35.37) |
| Malnutrition at M12 | Yes | 2 (1.71) | 0 (0) | 2 (0.86) | 0 (0) | 0 (0) | 0 (0) | 0 (0) | 0 (0) | 0 (0) |
| No | 76 (64.96) | 68 (59.13) | 144 (62.07) | 31 (60.78) | 28 (52.83) | 59 (56.73) | 25 (60.98) | 23 (56.1) | 48 (58.54) |
| Unknown | 39 (33.33) | 47 (40.87) | 86 (37.07) | 20 (39.22) | 25 (47.17) | 45 (43.27) | 16 (39.02) | 18 (43.9) | 34 (41.46) |
| HIV at baseline | Yes | 6 (5.13) | 2 (1.74) | 8 (3.45) | 3 (5.88) | 2 (3.77) | 5 (4.81) | 2 (4.88) | 1 (2.44) | 3 (3.66) |
| No | 110 (94.02) | 113 (98.26) | 223 (96.12) | 47 (92.16) | 51 (96.23) | 98 (94.23) | 38 (92.68) | 40 (97.56) | 78 (95.12) |
| Unknown | 1 (0.85) | 0 (0) | 1 (0.43) | 1 (1.96) | 0 (0) | 1 (0.96) | 1 (2.44) | 0 (0) | 1 (1.22) |
| HIV at M1 | Yes | 0 (0) | 0 (0) | 0 (0) | 0 (0) | 0 (0) | 0 (0) | 0 (0) | 0 (0) | 0 (0) |
| No | 107 (91.45) | 104 (90.43) | 211 (90.95) | 46 (90.2) | 47 (88.68) | 93 (89.42) | 36 (87.8) | 36 (87.8) | 72 (87.8) |
| Unknown | 10 (8.55) | 11 (9.57) | 21 (9.05) | 5 (9.8) | 6 (11.32) | 11 (10.58) | 5 (12.2) | 5 (12.2) | 10 (12.2) |
| HIV at M3 | Yes | 0 (0) | 0 (0) | 0 (0) | 0 (0) | 0 (0) | 0 (0) | 0 (0) | 0 (0) | 0 (0) |
| No | 103 (88.03) | 102 (88.7) | 205 (88.36) | 43 (84.31) | 45 (84.91) | 88 (84.62) | 34 (82.93) | 35 (85.37) | 69 (84.15) |
| Unknown | 14 (11.97) | 13 (11.3) | 27 (11.64) | 8 (15.69) | 8 (15.09) | 16 (15.38) | 7 (17.07) | 6 (14.63) | 13 (15.85) |
| HIV at M12 | Yes | 0 (0) | 0 (0) | 0 (0) | 0 (0) | 0 (0) | 0 (0) | 0 (0) | 0 (0) | 0 (0) |
| No | 78 (66.67) | 68 (59.13) | 146 (62.93) | 31 (60.78) | 28 (52.83) | 59 (56.73) | 25 (60.98) | 23 (56.1) | 48 (58.54) |
| Unknown | 39 (33.33) | 47 (40.87) | 86 (37.07) | 20 (39.22) | 25 (47.17) | 45 (43.27) | 16 (39.02) | 18 (43.9) | 34 (41.46) |
| Tuberculosis at baseline | Yes | 0 (0) | 0 (0) | 0 (0) | 0 (0) | 0 (0) | 0 (0) | 0 (0) | 0 (0) | 0 (0) |
| No | 2 (1.71) | 1 (0.87) | 3 (1.29) | 1 (1.96) | 0 (0) | 1 (0.96) | 0 (0) | 0 (0) | 0 (0) |
| Unknown | 115 (98.29) | 114 (99.13) | 229 (98.71) | 50 (98.04) | 53 (100) | 103 (99.04) | 41 (100) | 41 (100) | 82 (100) |
| Tuberculosis at M1 | Yes | 0 (0) | 0 (0) | 0 (0) | 0 (0) | 0 (0) | 0 (0) | 0 (0) | 0 (0) | 0 (0) |
| No | 107 (91.45) | 104 (90.43) | 211 (90.95) | 46 (90.2) | 47 (88.68) | 93 (89.42) | 36 (87.8) | 36 (87.8) | 72 (87.8) |
| Unknown | 10 (8.55) | 11 (9.57) | 21 (9.05) | 5 (9.8) | 6 (11.32) | 11 (10.58) | 5 (12.2) | 5 (12.2) | 10 (12.2) |
| Tuberculosis at M3 | Yes | 0 (0) | 0 (0) | 0 (0) | 0 (0) | 0 (0) | 0 (0) | 0 (0) | 0 (0) | 0 (0) |
| No | 103 (88.03) | 102 (88.7) | 205 (88.36) | 43 (84.31) | 45 (84.91) | 88 (84.62) | 34 (82.93) | 35 (85.37) | 69 (84.15) |
| Unknown | 14 (11.97) | 13 (11.3) | 27 (11.64) | 8 (15.69) | 8 (15.09) | 16 (15.38) | 7 (17.07) | 6 (14.63) | 13 (15.85) |
| Tuberculosis at M12 | Yes | 0 (0) | 0 (0) | 0 (0) | 0 (0) | 0 (0) | 0 (0) | 0 (0) | 0 (0) | 0 (0) |
| No | 78 (66.67) | 68 (59.13) | 146 (62.93) | 31 (60.78) | 28 (52.83) | 59 (56.73) | 25 (60.98) | 23 (56.1) | 48 (58.54) |
| Unknown | 39 (33.33) | 47 (40.87) | 86 (37.07) | 20 (39.22) | 25 (47.17) | 45 (43.27) | 16 (39.02) | 18 (43.9) | 34 (41.46) |
| Malaria at baseline | Yes | 2 (1.71) | 3 (2.61) | 5 (2.16) | 0 (0) | 2 (3.77) | 2 (1.92) | 0 (0) | 2 (4.88) | 2 (2.44) |
| No | 107 (91.45) | 102 (88.7) | 209 (90.09) | 45 (88.24) | 48 (90.57) | 93 (89.42) | 36 (87.8) | 36 (87.8) | 72 (87.8) |
| Unknown | 8 (6.84) | 10 (8.7) | 18 (7.76) | 6 (11.76) | 3 (5.66) | 9 (8.65) | 5 (12.2) | 3 (7.32) | 8 (9.76) |
| Malaria at M1 | Yes | 1 (0.85) | 0 (0) | 1 (0.43) | 0 (0) | 0 (0) | 0 (0) | 0 (0) | 0 (0) | 0 (0) |
| No | 102 (87.18) | 101 (87.83) | 203 (87.5) | 46 (90.2) | 45 (84.91) | 91 (87.5) | 36 (87.8) | 36 (87.8) | 72 (87.8) |
| Unknown | 14 (11.97) | 14 (12.17) | 28 (12.07) | 5 (9.8) | 8 (15.09) | 13 (12.5) | 5 (12.2) | 5 (12.2) | 10 (12.2) |
| Malaria at M3 | Yes | 0 (0) | 0 (0) | 0 (0) | 0 (0) | 0 (0) | 0 (0) | 0 (0) | 0 (0) | 0 (0) |
| No | 99 (84.62) | 97 (84.35) | 196 (84.48) | 41 (80.39) | 43 (81.13) | 84 (80.77) | 32 (78.05) | 34 (82.93) | 66 (80.49) |
| Unknown | 18 (15.38) | 18 (15.65) | 36 (15.52) | 10 (19.61) | 10 (18.87) | 20 (19.23) | 9 (21.95) | 7 (17.07) | 16 (19.51) |
| Malaria at M12 | Yes | 1 (0.85) | 2 (1.74) | 3 (1.29) | 0 (0) | 2 (3.77) | 2 (1.92) | 0 (0) | 1 (2.44) | 1 (1.22) |
| No | 75 (64.1) | 63 (54.78) | 138 (59.48) | 31 (60.78) | 25 (47.17) | 56 (53.85) | 25 (60.98) | 21 (51.22) | 46 (56.1) |
| Unknown | 41 (35.04) | 50 (43.48) | 91 (39.22) | 20 (39.22) | 26 (49.06) | 46 (44.23) | 16 (39.02) | 19 (46.34) | 35 (42.68) |
| COVID-19 symptoms at baseline | 1-3 | 53 (45.3) | 54 (46.96) | 107 (46.12) | 26 (50.98) | 25 (47.17) | 51 (49.04) | 18 (43.9) | 20 (48.78) | 38 (46.34) |
| 4-6 | 45 (38.46) | 46 (40) | 91 (39.22) | 18 (35.29) | 23 (43.4) | 41 (39.42) | 16 (39.02) | 19 (46.34) | 35 (42.68) |
| >6 | 19 (16.24) | 15 (13.04) | 34 (14.66) | 7 (13.73) | 5 (9.43) | 12 (11.54) | 7 (17.07) | 2 (4.88) | 9 (10.98) |
| Unknown | 0 (0) | 0 (0) | 0 (0) | 0 (0) | 0 (0) | 0 (0) | 0 (0) | 0 (0) | 0 (0) |
| COVID-19 symptoms group | No symp from D7 | 35 (29.91) | 34 (29.57) | 69 (29.74) | 11 (21.57) | 15 (28.3) | 26 (25) | 8 (19.51) | 15 (36.59) | 23 (28.05) |
| No symp from D14 | 27 (23.08) | 36 (31.3) | 63 (27.16) | 11 (21.57) | 18 (33.96) | 29 (27.88) | 10 (24.39) | 11 (26.83) | 21 (25.61) |
| No symp from D21 | 29 (24.79) | 27 (23.48) | 56 (24.14) | 12 (23.53) | 10 (18.87) | 22 (21.15) | 9 (21.95) | 6 (14.63) | 15 (18.29) |
| still symp at D21 | 26 (22.22) | 18 (15.65) | 44 (18.97) | 17 (33.33) | 10 (18.87) | 27 (25.96) | 14 (34.15) | 9 (21.95) | 23 (28.05) |
| Unknown | 0 (0) | 0 (0) | 0 (0) | 0 (0) | 0 (0) | 0 (0) | 0 (0) | 0 (0) | 0 (0) |
| COVID-19 wave | Wave 1 – Alpha/Beta | 4 (3.42) | 5 (4.35) | 9 (3.88) | 1 (1.96) | 3 (5.66) | 4 (3.85) | 1 (2.44) | 2 (4.88) | 3 (3.66) |
| Wave 2 – Delta | 84 (71.79) | 74 (64.35) | 158 (68.1) | 37 (72.55) | 35 (66.04) | 72 (69.23) | 29 (70.73) | 27 (65.85) | 56 (68.29) |
| Wave 3 – Omicron BA.1/BA.2 | 29 (24.79) | 36 (31.3) | 65 (28.02) | 12 (23.53) | 15 (28.3) | 27 (25.96) | 10 (24.39) | 12 (29.27) | 22 (26.83) |
| Wave 4 – Omicron BA.4/BA.5 | 0 (0) | 0 (0) | 0 (0) | 1 (1.96) | 0 (0) | 1 (0.96) | 1 (2.44) | 0 (0) | 1 (1.22) |
| Hospitalization | Yes | 0 (0) | 0 (0) | 0 (0) | 0 (0) | 0 (0) | 0 (0) | 0 (0) | 0 (0) | 0 (0) |
| No | 117 (100) | 115 (100) | 232 (100) | 51 (100) | 53 (100) | 104 (100) | 41 (100) | 41 (100) | 82 (100) |
| Death | Yes | 0 (0) | 0 (0) | 0 (0) | 0 (0) | 0 (0) | 0 (0) | 0 (0) | 0 (0) | 0 (0) |
| No | 117 (100) | 115 (100) | 232 (100) | 51 (100) | 53 (100) | 104 (100) | 41 (100) | 41 (100) | 82 (100) |
| Medical events | Yes | 0 (0) | 0 (0) | 0 (0) | 0 (0) | 0 (0) | 0 (0) | 0 (0) | 0 (0) | 0 (0) |
| No | 117 (100) | 115 (100) | 232 (100) | 50 (98.04) | 53 (100) | 103 (99.04) | 40 (97.56) | 41 (100) | 81 (98.78) |
| Unknown | 0 (0) | 0 (0) | 0 (0) | 1 (1.96) | 0 (0) | 1 (0.96) | 1 (2.44) | 0 (0) | 1 (1.22) |
| SpO2 | <= 93 | 1 (0.85) | 1 (0.87) | 2 (0.86) | 0 (0) | 0 (0) | 0 (0) | 0 (0) | 0 (0) | 0 (0) |
| > 93 | 116 (99.15) | 114 (99.13) | 230 (99.14) | 51 (100) | 53 (100) | 104 (100) | 41 (100) | 41 (100) | 82 (100) |
| Unknown | 0 (0) | 0 (0) | 0 (0) | 0 (0) | 0 (0) | 0 (0) | 0 (0) | 0 (0) | 0 (0) |
| Physical exam at baseline | Normal | 114 (97.44) | 105 (91.3) | 219 (94.4) | 51 (100) | 50 (94.34) | 101 (97.12) | 41 (100) | 40 (97.56) | 81 (98.78) |
| Abnormal not significant | 2 (1.71) | 9 (7.83) | 11 (4.74) | 0 (0) | 3 (5.66) | 3 (2.88) | 0 (0) | 1 (2.44) | 1 (1.22) |
| Abnormal significant | 1 (0.85) | 1 (0.87) | 2 (0.86) | 0 (0) | 0 (0) | 0 (0) | 0 (0) | 0 (0) | 0 (0) |
| Unknown | 0 (0) | 0 (0) | 0 (0) | 0 (0) | 0 (0) | 0 (0) | 0 (0) | 0 (0) | 0 (0) |
| Physical exam at M1 | Normal | 102 (87.18) | 102 (88.7) | 204 (87.93) | 43 (84.31) | 45 (84.91) | 88 (84.62) | 35 (85.37) | 35 (85.37) | 70 (85.37) |
| Abnormal not significant | 5 (4.27) | 2 (1.74) | 7 (3.02) | 3 (5.88) | 2 (3.77) | 5 (4.81) | 1 (2.44) | 1 (2.44) | 2 (2.44) |
| Abnormal significant | 0 (0) | 0 (0) | 0 (0) | 0 (0) | 0 (0) | 0 (0) | 0 (0) | 0 (0) | 0 (0) |
| Unknown | 10 (8.55) | 11 (9.57) | 21 (9.05) | 5 (9.8) | 6 (11.32) | 11 (10.58) | 5 (12.2) | 5 (12.2) | 10 (12.2) |
| Physical exam at M3 | Normal | 103 (88.03) | 100 (86.96) | 203 (87.5) | 43 (84.31) | 44 (83.02) | 87 (83.65) | 34 (82.93) | 35 (85.37) | 69 (84.15) |
| Abnormal not significant | 0 (0) | 2 (1.74) | 2 (0.86) | 0 (0) | 1 (1.89) | 1 (0.96) | 0 (0) | 0 (0) | 0 (0) |
| Abnormal significant | 0 (0) | 0 (0) | 0 (0) | 0 (0) | 0 (0) | 0 (0) | 0 (0) | 0 (0) | 0 (0) |
| Unknown | 14 (11.97) | 13 (11.3) | 27 (11.64) | 8 (15.69) | 8 (15.09) | 16 (15.38) | 7 (17.07) | 6 (14.63) | 13 (15.85) |
| Physical exam at M6 | Normal | 80 (68.38) | 87 (75.65) | 167 (71.98) | 35 (68.63) | 34 (64.15) | 69 (66.35) | 26 (63.41) | 28 (68.29) | 54 (65.85) |
| Abnormal not significant | 0 (0) | 0 (0) | 0 (0) | 0 (0) | 0 (0) | 0 (0) | 0 (0) | 0 (0) | 0 (0) |
| Abnormal significant | 0 (0) | 0 (0) | 0 (0) | 0 (0) | 0 (0) | 0 (0) | 0 (0) | 0 (0) | 0 (0) |
| Unknown | 37 (31.62) | 28 (24.35) | 65 (28.02) | 16 (31.37) | 19 (35.85) | 35 (33.65) | 15 (36.59) | 13 (31.71) | 28 (34.15) |
| Physical exam at M12 | Normal | 77 (65.81) | 67 (58.26) | 144 (62.07) | 31 (60.78) | 28 (52.83) | 59 (56.73) | 25 (60.98) | 23 (56.1) | 48 (58.54) |
| Abnormal not significant | 0 (0) | 0 (0) | 0 (0) | 0 (0) | 0 (0) | 0 (0) | 0 (0) | 0 (0) | 0 (0) |
| Abnormal significant | 1 (0.85) | 1 (0.87) | 2 (0.86) | 0 (0) | 0 (0) | 0 (0) | 0 (0) | 0 (0) | 0 (0) |
| Unknown | 39 (33.33) | 47 (40.87) | 86 (37.07) | 20 (39.22) | 25 (47.17) | 45 (43.27) | 16 (39.02) | 18 (43.9) | 34 (41.46) |
| Vaccinated at baseline | No | 81 (69.23) | 88 (76.52) | 169 (72.84) | 32 (62.75) | 40 (75.47) | 72 (69.23) | 25 (60.98) | 31 (75.61) | 56 (68.29) |
| Yes | 24 (20.51) | 17 (14.78) | 41 (17.67) | 12 (23.53) | 11 (20.75) | 23 (22.12) | 9 (21.95) | 9 (21.95) | 18 (21.95) |
| Unknown | 12 (10.26) | 10 (8.7) | 22 (9.48) | 7 (13.73) | 2 (3.77) | 9 (8.65) | 7 (17.07) | 1 (2.44) | 8 (9.76) |
| Comorbidities | Hypertension | 14 | 11 | 25 | 10 | 5 | 15 | 7 | 5 | 12 |
| Asthma | 5 | 4 | 9 | 3 | 0 | 3 | 3 | 0 | 3 |
| Diabetes Mellitus (type 1) | 2 | 0 | 2 | 2 | 0 | 2 | 1 | 0 | 1 |
| Diabetes Mellitus (type 2) | 0 | 6 | 6 | 0 | 2 | 2 | 0 | 2 | 2 |
| Uncontrolled HIV or known CD4 < 200/mm3 | 3 | 1 | 4 | 1 | 0 | 1 | 1 | 0 | 1 |
| Heart failure | 1 | 0 | 1 | 0 | 0 | 0 | 0 | 0 | 0 |
| Sickle cell disease | 0 | 0 | 0 | 0 | 0 | 0 | 0 | 0 | 0 |
| Acquired Cardiomyopathy | 0 | 0 | 0 | 0 | 1 | 1 | 0 | 1 | 1 |
| Immunosuppressive treatment | 0 | 1 | 1 | 0 | 0 | 0 | 0 | 0 | 0 |
| Post-Tuberculosis fibrosis/Aspergilloma | 1 | 0 | 1 | 0 | 0 | 0 | 0 | 0 | 0 |
| Pulmonary fibrosis | 1 | 0 | 1 | 0 | 0 | 0 | 0 | 0 | 0 |
| Stroke | 0 | 1 | 1 | 0 | 0 | 0 | 0 | 0 | 0 |
| Samples available per tp | D0 | 103 | 107 | 210 | 49 | 50 | 99 | 38 | 38 | 76 |
| D7 |  |  |  |  |  |  |  |  |  |
| D21 | 98 | 103 | 201 | 44 | 46 | 90 | 36 | 35 | 71 |
| M1 |  |  |  |  |  |  |  |  |  |
| M3 | 96 | 90 | 186 | 28 | 29 | 57 | 23 | 23 | 46 |
| M6 | 66 | 75 | 141 |  |  |  |  |  |  |
| M12 | 64 | 60 | 124 |  |  |  |  |  |  |
| UNS | 0 | 2 | 2 |  |  |  |  |  |  |
| Samples available per individual | 8 | 0 | 0 | 0 |  |  |  |  |  |  |
| 7 | 0 | 0 | 0 |  |  |  |  |  |  |
| 6 | 0 | 1 | 1 |  |  |  |  |  |  |
| 5 | 32 | 37 | 69 |  |  |  |  |  |  |
| 4 | 32 | 35 | 67 |  |  |  |  |  |  |
| 3 | 33 | 22 | 55 | 26 | 23 | 49 | 20 | 19 | 39 |
| 2 | 20 | 20 | 40 | 18 | 26 | 44 | 16 | 17 | 33 |
| 1 | 0 | 0 | 0 | 6 | 3 | 9 | 4 | 3 | 7 |

**Table S 2 Spearman correlations between binding antibody levels and neutralization capacity against Wuhan strain, stratified by isotype, analyte, and time point.**

Spearman’s rank correlation coefficients (ρ) and corresponding p-values (Benjamini-Hochberg-adjusted) are reported for each isotype-antigen combination (IgA, IgG, IgM) versus neutralizing activity against the ancestral Wuhan strain. Correlations are shown globally (ALL) and across individual time points (D0 to M12). The strongest associations were observed for anti-RBD, S, and S1 antibodies, particularly for IgG from D21 onwards, although similar patterns were also evident for IgA. Cells are color-coded by strength of correlation: yellow for ρ between 0.50 and 0.59, light green for ρ between 0.60 and 0.79, and dark green for ρ ≥ 0.80.

|  |  | **Nct** | | **Nfl** | | **RBD** | | **S** | | **S Beta** | | **S Delta** | | **S1** | | **S2** | |
| --- | --- | --- | --- | --- | --- | --- | --- | --- | --- | --- | --- | --- | --- | --- | --- | --- | --- |
|  | **tp** | **ρ** | **adj**  **p-value** | **ρ** | **adj**  **p-value** | **ρ** | **adj**  **p-value** | **ρ** | **adj**  **p-value** | **ρ** | **adj**  **p-value** | **ρ** | **adj**  **p-value** | **ρ** | **adj**  **p-value** | **ρ** | **adj**  **p-value** |
| IgG | ALL | **0.350** | **<0.001** | **0.462** | **<0.001** | **0.852** | **<0.001** | **0.836** | **<0.001** | **0.627** | **<0.001** | **0.701** | **<0.001** | **0.856** | **<0.001** | **0.582** | **<0.001** |
| D0 | 0.164 | 0.021 | 0.217 | 0.002 | 0.554 | <0.001 | 0.555 | <0.001 | 0.366 | <0.001 | 0.466 | <0.001 | 0.545 | <0.001 | 0.411 | <0.001 |
| D21 | 0.342 | <0.001 | 0.428 | <0.001 | 0.882 | <0.001 | 0.854 | <0.001 | 0.719 | <0.001 | 0.740 | <0.001 | 0.888 | <0.001 | 0.593 | <0.001 |
| M3 | 0.258 | <0.001 | 0.358 | <0.001 | 0.911 | <0.001 | 0.884 | <0.001 | 0.637 | <0.001 | 0.684 | <0.001 | 0.908 | <0.001 | 0.473 | <0.001 |
| M6 | 0.362 | 0.002 | 0.398 | <0.001 | 0.856 | <0.001 | 0.830 | <0.001 | 0.400 | <0.001 | 0.571 | <0.001 | 0.847 | <0.001 | 0.397 | <0.001 |
| M12 | 0.421 | 0.008 | 0.470 | 0.003 | 0.736 | <0.001 | 0.725 | <0.001 | 0.402 | 0.012 | 0.446 | 0.005 | 0.731 | <0.001 | 0.387 | 0.014 |
|  | | | | | | | | | | | | | | | | | |
| IgA | ALL | **0.362** | **<0.001** | **0.301** | **<0.001** | **0.709** | **<0.001** | **0.678** | **<0.001** | **0.423** | **<0.001** | **0.540** | **<0.001** | **0.725** | **<0.001** | **0.429** | **<0.001** |
| D0 | 0.255 | <0.001 | 0.130 | 0.069 | 0.417 | <0.001 | 0.432 | <0.001 | 0.263 | <0.001 | 0.350 | <0.001 | 0.453 | <0.001 | 0.304 | <0.001 |
| D21 | 0.422 | <0.001 | 0.314 | <0.001 | 0.772 | <0.001 | 0.720 | <0.001 | 0.469 | <0.001 | 0.545 | <0.001 | 0.779 | <0.001 | 0.410 | <0.001 |
| M3 | 0.297 | <0.001 | 0.255 | <0.001 | 0.730 | <0.001 | 0.674 | <0.001 | 0.359 | <0.001 | 0.500 | <0.001 | 0.728 | <0.001 | 0.360 | <0.001 |
| M6 | 0.207 | 0.099 | 0.274 | 0.023 | 0.675 | <0.001 | 0.685 | <0.001 | 0.417 | <0.001 | 0.454 | <0.001 | 0.701 | <0.001 | 0.273 | 0.023 |
| M12 | 0.277 | 0.089 | 0.278 | 0.089 | 0.546 | <0.001 | 0.597 | <0.001 | 0.441 | <0.001 | 0.397 | 0.012 | 0.562 | <0.001 | 0.285 | 0.089 |
|  | | | | | | | | | | | | | | | | | |
| IgM | ALL | **0.022** | **0.574** | **0.063** | **0.107** | **0.184** | **<0.001** | **0.197** | **<0.001** | **0.019** | **0.616** | **0.075** | **0.053** | **0.197** | **<0.001** | **0.058** | **0.136** |
| D0 | 0.085 | 0.221 | 0.109 | 0.121 | 0.210 | 0.003 | 0.250 | <0.001 | 0.117 | 0.100 | 0.206 | 0.003 | 0.245 | <0.001 | 0.211 | 0.003 |
| D21 | 0.076 | 0.327 | 0.082 | 0.301 | 0.102 | 0.192 | 0.131 | 0.092 | 0.061 | 0.430 | 0.038 | 0.617 | 0.109 | 0.166 | 0.008 | 0.909 |
| M3 | -0.092 | 0.265 | -0.038 | 0.618 | 0.098 | 0.247 | 0.081 | 0.326 | -0.078 | 0.331 | -0.065 | 0.408 | 0.115 | 0.171 | -0.129 | 0.124 |
| M6 | -0.046 | 0.716 | -0.007 | 0.950 | 0.121 | 0.333 | 0.176 | 0.166 | -0.152 | 0.238 | -0.119 | 0.333 | 0.141 | 0.267 | -0.090 | 0.469 |
| M12 | 0.149 | 0.418 | 0.187 | 0.286 | -0.074 | 0.703 | 0.099 | 0.636 | 0.047 | 0.754 | 0.062 | 0.735 | -0.075 | 0.703 | 0.046 | 0.754 |

|  |
| --- |

**Table S 3 Logistic regression and non-parametric test results for binding and neutralizing antibody levels and risk of SARS-CoV-2 reinfection.**

Two complementary analyses are shown for comparing antibody levels and neutralizing activity between reinfected and non-reinfected participants: (1) Logistic regression (odds ratios [OR], 95% CI, and adjusted p-values) and (2) non-parametric Wilcoxon rank-sum tests (raw and Benjamini-Hochberg-adjusted p-values). Analyses were conducted separately for each antibody isotype-antigen combination (IgA, IgG, IgM against Nct, Nfl, RBD, S, S Beta, S Delta, S1, S2) and time point (D21, M1, and M3), and for neutralization responses (percent inhibition) against SARS-CoV-2 variants (Wuhan, Alpha, Beta, Gamma, Delta, Omicron) at D0, D21, and M3. Significant associations are indicated with asterisks (*p < 0.05, **p < 0.01, ***p < 0.001). Results show consistently higher antibody levels (IgA, IgG at D21–M3) and neutralizing capacity (M3 for Wuhan, Alpha, Gamma, Delta) in participants without reinfection, aligning with logistic regression findings in Figure 3 (main text).

| ANTIBODY LEVELS | | | | | | | | | | | | |
| --- | --- | --- | --- | --- | --- | --- | --- | --- | --- | --- | --- | --- |
| Isotype - Analyte | **tp** | **logistic model results** | | | | | | | | **non-parametric statistical tests** | | |
| **Odd ratios** | **Std**  **error** | **statistic** | **CI low** | **CI high** | **p-value** | **adj**  **p-val** | **sign** | **p-value** | **adj p-val** | **sign** |
| IgA_Nct | D21 | 0.696 | 0.162 | -2.231 | 0.499 | 0.944 | 2.6E-02 | 4.2E-02 | * | 1.1E-03 | 2.9E-03 | ** |
| IgA_Nct | M1 | 0.909 | 0.153 | -0.621 | 0.664 | 1.214 | 5.3E-01 | 6.0E-01 |  | 2.0E-02 | 3.8E-02 | * |
| IgA_Nct | M3 | 0.575 | 0.227 | -2.440 | 0.362 | 0.884 | 1.5E-02 | 2.5E-02 | * | 9.5E-04 | 2.6E-03 | ** |
| IgA_Nfl | D21 | 0.912 | 0.119 | -0.779 | 0.716 | 1.143 | 4.4E-01 | 5.1E-01 |  | 2.7E-01 | 3.5E-01 |  |
| IgA_Nfl | M1 | 0.933 | 0.129 | -0.533 | 0.717 | 1.194 | 5.9E-01 | 6.6E-01 |  | 3.2E-01 | 4.1E-01 |  |
| IgA_Nfl | M3 | 0.589 | 0.203 | -2.609 | 0.390 | 0.863 | 9.1E-03 | 1.7E-02 | * | 2.2E-02 | 4.3E-02 | * |
| IgA_RBD | D21 | 0.643 | 0.128 | -3.456 | 0.498 | 0.823 | 5.5E-04 | 1.4E-03 | ** | 3.0E-04 | 9.4E-04 | *** |
| IgA_RBD | M1 | 0.678 | 0.126 | -3.083 | 0.527 | 0.866 | 2.0E-03 | 4.5E-03 | ** | 9.2E-04 | 2.6E-03 | ** |
| IgA_RBD | M3 | 0.470 | 0.150 | -5.051 | 0.348 | 0.626 | 4.4E-07 | 4.5E-06 | *** | 7.2E-08 | 7.1E-07 | *** |
| IgA_S | D21 | 0.615 | 0.134 | -3.626 | 0.471 | 0.798 | 2.9E-04 | 8.0E-04 | *** | 1.2E-04 | 4.0E-04 | *** |
| IgA_S | M1 | 0.687 | 0.130 | -2.883 | 0.530 | 0.885 | 3.9E-03 | 7.9E-03 | ** | 1.0E-03 | 2.7E-03 | ** |
| IgA_S | M3 | 0.500 | 0.149 | -4.644 | 0.370 | 0.666 | 3.4E-06 | 1.9E-05 | *** | 1.8E-07 | 1.4E-06 | *** |
| IgA_S Beta | D21 | 0.457 | 0.212 | -3.686 | 0.299 | 0.688 | 2.3E-04 | 6.8E-04 | *** | 1.4E-04 | 4.8E-04 | *** |
| IgA_S Beta | M1 | 0.495 | 0.228 | -3.083 | 0.313 | 0.769 | 2.1E-03 | 4.5E-03 | ** | 6.9E-04 | 2.1E-03 | ** |
| IgA_S Beta | M3 | 0.353 | 0.257 | -4.048 | 0.210 | 0.577 | 5.2E-05 | 2.1E-04 | *** | 2.1E-05 | 9.1E-05 | *** |
| IgA_S Delta | D21 | 0.469 | 0.183 | -4.136 | 0.325 | 0.667 | 3.5E-05 | 1.6E-04 | *** | 6.6E-06 | 3.2E-05 | *** |
| IgA_S Delta | M1 | 0.506 | 0.193 | -3.529 | 0.344 | 0.735 | 4.2E-04 | 1.1E-03 | ** | 9.3E-05 | 3.5E-04 | *** |
| IgA_S Delta | M3 | 0.332 | 0.225 | -4.907 | 0.211 | 0.509 | 9.3E-07 | 7.4E-06 | *** | 6.9E-08 | 7.1E-07 | *** |
| IgA_S1 | D21 | 0.664 | 0.122 | -3.364 | 0.521 | 0.841 | 7.7E-04 | 1.9E-03 | ** | 3.2E-04 | 9.9E-04 | *** |
| IgA_S1 | M1 | 0.704 | 0.120 | -2.918 | 0.554 | 0.890 | 3.5E-03 | 7.3E-03 | ** | 8.6E-04 | 2.5E-03 | ** |
| IgA_S1 | M3 | 0.508 | 0.139 | -4.875 | 0.385 | 0.664 | 1.1E-06 | 7.8E-06 | *** | 7.4E-08 | 7.1E-07 | *** |
| IgA_S2 | D21 | 0.525 | 0.175 | -3.676 | 0.370 | 0.736 | 2.4E-04 | 6.8E-04 | *** | 7.2E-05 | 2.7E-04 | *** |
| IgA_S2 | M1 | 0.588 | 0.179 | -2.965 | 0.411 | 0.832 | 3.0E-03 | 6.4E-03 | ** | 1.6E-03 | 4.1E-03 | ** |
| IgA_S2 | M3 | 0.450 | 0.207 | -3.853 | 0.296 | 0.669 | 1.2E-04 | 4.0E-04 | *** | 4.4E-05 | 1.8E-04 | *** |
| IgG_Nct | D21 | 0.302 | 0.207 | -5.781 | 0.198 | 0.447 | 7.4E-09 | 1.3E-07 | *** | 2.4E-10 | 5.1E-09 | *** |
| IgG_Nct | M1 | 0.367 | 0.203 | -4.937 | 0.243 | 0.540 | 8.0E-07 | 7.2E-06 | *** | 1.2E-07 | 1.1E-06 | *** |
| IgG_Nct | M3 | 0.119 | 0.310 | -6.858 | 0.063 | 0.213 | 7.0E-12 | 5.0E-10 | *** | 1.0E-13 | 9.8E-12 | *** |
| IgG_Nfl | D21 | 0.485 | 0.156 | -4.657 | 0.355 | 0.654 | 3.2E-06 | 1.9E-05 | *** | 2.6E-07 | 1.9E-06 | *** |
| IgG_Nfl | M1 | 0.494 | 0.157 | -4.477 | 0.361 | 0.670 | 7.6E-06 | 3.9E-05 | *** | 4.6E-06 | 2.3E-05 | *** |
| IgG_Nfl | M3 | 0.282 | 0.215 | -5.881 | 0.182 | 0.424 | 4.1E-09 | 9.8E-08 | *** | 8.1E-11 | 2.6E-09 | *** |
| IgG_RBD | D21 | 0.751 | 0.113 | -2.536 | 0.601 | 0.936 | 1.1E-02 | 2.1E-02 | * | 5.0E-03 | 1.1E-02 | * |
| IgG_RBD | M1 | 0.803 | 0.112 | -1.950 | 0.644 | 1.001 | 5.1E-02 | 8.0E-02 |  | 3.3E-02 | 5.9E-02 |  |
| IgG_RBD | M3 | 0.578 | 0.132 | -4.142 | 0.444 | 0.747 | 3.4E-05 | 1.6E-04 | *** | 2.2E-06 | 1.2E-05 | *** |
| IgG_S | D21 | 0.723 | 0.131 | -2.471 | 0.557 | 0.934 | 1.3E-02 | 2.4E-02 | * | 2.6E-03 | 6.3E-03 | ** |
| IgG_S | M1 | 0.805 | 0.127 | -1.708 | 0.628 | 1.033 | 8.8E-02 | 1.3E-01 |  | 3.9E-02 | 6.8E-02 |  |
| IgG_S | M3 | 0.537 | 0.157 | -3.973 | 0.392 | 0.726 | 7.1E-05 | 2.6E-04 | *** | 6.5E-07 | 4.5E-06 | *** |
| IgG_S Beta | D21 | 0.346 | 0.207 | -5.112 | 0.228 | 0.516 | 3.2E-07 | 3.8E-06 | *** | 3.5E-08 | 4.8E-07 | *** |
| IgG_S Beta | M1 | 0.468 | 0.200 | -3.804 | 0.314 | 0.688 | 1.4E-04 | 4.7E-04 | *** | 2.0E-05 | 8.9E-05 | *** |
| IgG_S Beta | M3 | 0.163 | 0.284 | -6.403 | 0.091 | 0.278 | 1.5E-10 | 5.5E-09 | *** | 7.6E-13 | 3.7E-11 | *** |
| IgG_S Delta | D21 | 0.446 | 0.196 | -4.124 | 0.302 | 0.651 | 3.7E-05 | 1.6E-04 | *** | 1.9E-06 | 1.1E-05 | *** |
| IgG_S Delta | M1 | 0.542 | 0.190 | -3.220 | 0.372 | 0.785 | 1.3E-03 | 3.1E-03 | ** | 6.8E-05 | 2.7E-04 | *** |
| IgG_S Delta | M3 | 0.249 | 0.254 | -5.477 | 0.149 | 0.404 | 4.3E-08 | 6.2E-07 | *** | 2.7E-10 | 5.1E-09 | *** |
| IgG_S1 | D21 | 0.756 | 0.118 | -2.372 | 0.599 | 0.952 | 1.8E-02 | 3.0E-02 | * | 7.0E-03 | 1.5E-02 | * |
| IgG_S1 | M1 | 0.814 | 0.114 | -1.810 | 0.651 | 1.018 | 7.0E-02 | 1.0E-01 |  | 4.2E-02 | 7.0E-02 |  |
| IgG_S1 | M3 | 0.581 | 0.136 | -4.000 | 0.442 | 0.755 | 6.3E-05 | 2.4E-04 | *** | 1.6E-06 | 1.0E-05 | *** |
| IgG_S2 | D21 | 0.468 | 0.202 | -3.751 | 0.312 | 0.691 | 1.8E-04 | 5.5E-04 | *** | 4.0E-06 | 2.1E-05 | *** |
| IgG_S2 | M1 | 0.548 | 0.192 | -3.125 | 0.373 | 0.796 | 1.8E-03 | 4.1E-03 | ** | 1.1E-04 | 3.9E-04 | *** |
| IgG_S2 | M3 | 0.299 | 0.252 | -4.785 | 0.179 | 0.484 | 1.7E-06 | 1.1E-05 | *** | 1.2E-08 | 2.0E-07 | *** |
| IgM_Nct | D21 | 0.729 | 0.121 | -2.621 | 0.574 | 0.923 | 8.8E-03 | 1.7E-02 | * | 6.6E-03 | 1.4E-02 | * |
| IgM_Nct | M1 | 0.764 | 0.148 | -1.821 | 0.571 | 1.021 | 6.9E-02 | 1.0E-01 |  | 7.1E-02 | 1.2E-01 |  |
| IgM_Nct | M3 | 0.793 | 0.126 | -1.841 | 0.618 | 1.016 | 6.6E-02 | 1.0E-01 |  | 3.8E-02 | 6.7E-02 |  |
| IgM_Nfl | D21 | 0.675 | 0.160 | -2.453 | 0.490 | 0.922 | 1.4E-02 | 2.5E-02 | * | 3.2E-02 | 5.9E-02 |  |
| IgM_Nfl | M1 | 0.769 | 0.193 | -1.359 | 0.524 | 1.119 | 1.7E-01 | 2.5E-01 |  | 1.8E-01 | 2.6E-01 |  |
| IgM_Nfl | M3 | 0.685 | 0.178 | -2.135 | 0.479 | 0.966 | 3.3E-02 | 5.2E-02 |  | 1.3E-02 | 2.7E-02 | * |
| IgM_RBD | D21 | 1.106 | 0.142 | 0.712 | 0.836 | 1.460 | 4.8E-01 | 5.4E-01 |  | 8.4E-01 | 8.7E-01 |  |
| IgM_RBD | M1 | 1.165 | 0.144 | 1.058 | 0.874 | 1.543 | 2.9E-01 | 3.9E-01 |  | 9.3E-01 | 9.4E-01 |  |
| IgM_RBD | M3 | 0.897 | 0.214 | -0.507 | 0.585 | 1.359 | 6.1E-01 | 6.6E-01 |  | 5.1E-01 | 5.9E-01 |  |
| IgM_S | D21 | 1.055 | 0.156 | 0.341 | 0.779 | 1.439 | 7.3E-01 | 7.6E-01 |  | 7.5E-01 | 8.2E-01 |  |
| IgM_S | M1 | 1.159 | 0.176 | 0.841 | 0.819 | 1.635 | 4.0E-01 | 5.0E-01 |  | 8.9E-01 | 9.0E-01 |  |
| IgM_S | M3 | 0.951 | 0.179 | -0.281 | 0.669 | 1.373 | 7.8E-01 | 8.0E-01 |  | 4.3E-01 | 5.1E-01 |  |
| IgM_S Beta | D21 | 0.734 | 0.260 | -1.189 | 0.439 | 1.223 | 2.3E-01 | 3.2E-01 |  | 2.1E-01 | 2.8E-01 |  |
| IgM_S Beta | M1 | 0.808 | 0.288 | -0.739 | 0.457 | 1.415 | 4.6E-01 | 5.3E-01 |  | 2.1E-01 | 2.8E-01 |  |
| IgM_S Beta | M3 | 0.786 | 0.267 | -0.900 | 0.463 | 1.330 | 3.7E-01 | 4.7E-01 |  | 1.6E-01 | 2.4E-01 |  |
| IgM S Delta | D21 | 1.158 | 0.177 | 0.830 | 0.824 | 1.647 | 4.1E-01 | 5.0E-01 |  | 4.1E-01 | 5.0E-01 |  |
| IgM S Delta | M1 | 1.218 | 0.198 | 0.996 | 0.823 | 1.795 | 3.2E-01 | 4.2E-01 |  | 3.5E-01 | 4.4E-01 |  |
| IgM S Delta | M3 | 1.027 | 0.243 | 0.108 | 0.637 | 1.655 | 9.1E-01 | 9.1E-01 |  | 1.0E+00 | 1.0E+00 |  |
| IgM_S1 | D21 | 1.116 | 0.139 | 0.787 | 0.852 | 1.472 | 4.3E-01 | 5.1E-01 |  | 8.2E-01 | 8.7E-01 |  |
| IgM_S1 | M1 | 1.198 | 0.148 | 1.217 | 0.893 | 1.601 | 2.2E-01 | 3.1E-01 |  | 4.8E-01 | 5.6E-01 |  |
| IgM_S1 | M3 | 0.969 | 0.193 | -0.165 | 0.661 | 1.413 | 8.7E-01 | 8.8E-01 |  | 7.7E-01 | 8.3E-01 |  |
| IgM_S2 | D21 | 1.099 | 0.187 | 0.504 | 0.762 | 1.590 | 6.1E-01 | 6.6E-01 |  | 5.3E-01 | 6.0E-01 |  |
| IgM_S2 | M1 | 1.180 | 0.206 | 0.803 | 0.787 | 1.767 | 4.2E-01 | 5.1E-01 |  | 4.0E-01 | 4.9E-01 |  |
| IgM_S2 | M3 | 1.099 | 0.211 | 0.447 | 0.729 | 1.675 | 6.6E-01 | 6.9E-01 |  | 5.8E-01 | 6.4E-01 |  |
| NEUTRALIZATION | | | | | | | | | | | | |
| Antigens | **tp** | **logistic model results** | | | | | | | | **non-parametric statistical tests** | | |
| **Odd ratios** | **Std**  **error** | **statistic** | **CI low** | **CI high** | **p-value** | **adj**  **p-val** | **sign** | **p-value** | **adj p-val** | **sign** |
| Wuhan | D0 | 1.012 | 0.006 | 1.988 | 1.000 | 1.025 | 0.0468 | 0.1117 |  | 0.0206 | 0.0619 |  |
| Wuhan | D21 | 0.999 | 0.004 | -0.368 | 0.990 | 1.006 | 0.7127 | 0.8018 |  | 0.3947 | 0.5028 |  |
| Wuhan | M3 | 0.984 | 0.005 | -2.952 | 0.973 | 0.994 | 0.0032 | 0.0284 | * | 0.0070 | 0.0254 | * |
| Alpha | D0 | 1.014 | 0.007 | 1.977 | 1.000 | 1.030 | 0.0481 | 0.1117 |  | 0.0406 | 0.1045 |  |
| Alpha | D21 | 0.998 | 0.005 | -0.391 | 0.989 | 1.007 | 0.6957 | 0.8018 |  | 0.3368 | 0.4663 |  |
| Alpha | M3 | 0.982 | 0.007 | -2.697 | 0.969 | 0.995 | 0.0070 | 0.0315 | * | 0.0051 | 0.0254 | * |
| Beta | D0 | 1.016 | 0.009 | 1.742 | 0.998 | 1.035 | 0.0815 | 0.1466 |  | 0.6935 | 0.7343 |  |
| Beta | D21 | 1.001 | 0.005 | 0.235 | 0.990 | 1.012 | 0.8141 | 0.8620 |  | 0.8123 | 0.8123 |  |
| Beta | M3 | 0.984 | 0.008 | -1.912 | 0.967 | 1.000 | 0.0558 | 0.1117 |  | 0.0785 | 0.1624 |  |
| Gamma | D0 | 1.015 | 0.010 | 1.584 | 0.997 | 1.036 | 0.1133 | 0.1854 |  | 0.0812 | 0.1624 |  |
| Gamma | D21 | 0.999 | 0.005 | -0.133 | 0.988 | 1.010 | 0.8945 | 0.8945 |  | 0.4190 | 0.5028 |  |
| Gamma | M3 | 0.974 | 0.009 | -2.798 | 0.955 | 0.991 | 0.0051 | 0.0308 | * | 0.0012 | 0.0211 | * |
| Delta | D0 | 1.014 | 0.008 | 1.914 | 1.000 | 1.030 | 0.0556 | 0.1117 |  | 0.1291 | 0.2324 |  |
| Delta | D21 | 0.995 | 0.005 | -1.084 | 0.986 | 1.004 | 0.2786 | 0.3857 |  | 0.1955 | 0.2932 |  |
| Delta | M3 | 0.981 | 0.006 | -3.156 | 0.969 | 0.992 | 0.0016 | 0.0284 | * | 0.0061 | 0.0254 | * |
| Omicron | D0 | 1.021 | 0.015 | 1.379 | 0.993 | 1.059 | 0.1680 | 0.2521 |  | 0.1709 | 0.2796 |  |
| Omicron | D21 | 1.005 | 0.008 | 0.635 | 0.989 | 1.021 | 0.5256 | 0.6758 |  | 0.5587 | 0.6286 |  |
| Omicron | M3 | 0.964 | 0.015 | -2.457 | 0.933 | 0.989 | 0.0140 | 0.0504 |  | 0.0053 | 0.0254 | * |

**Table S 4 Model comparisons assessing treatment effects on binding and neutralizing antibody levels.**

Linear mixed-effects models (LMMs) were fitted for each antibody isotype-antigen combination (IgA, IgG, IgM with Nct, Nfl, RBD, S, S Beta, S Delta, S1, and S2), including fixed effects for time, site, and treatment arm, and random intercepts per participant. For neutralizing antibody responses against SARS-CoV-2 variants (Wuhan, Alpha, Beta, Gamma, Delta, and Omicron), generalized LMMs assuming a beta distribution were used.

Likelihood ratio tests (LRTs) compared full models (including treatment and treatment-by-time interaction) to reduced models excluding treatment. Analyses were conducted separately for each treatment comparison: ciclesonide-nitazoxanide (Cicle-Nita) vs Paracetamol and artesunate-amodiaquine with ivermectin vs Paracetamol. No improvement in model fit was observed when treatment terms were included.

|  |  |  | ANTIBODY LEVELS | | | | | | | | | | | | | | | |
| --- | --- | --- | --- | --- | --- | --- | --- | --- | --- | --- | --- | --- | --- | --- | --- | --- | --- | --- |
|  |  |  | **Cicle-Nita vs Paracetamol** | | | | | | | | **ASAQ-IVM vs Paracetamol** | | | | | | | |
| Isotype | **Analyte** | **Model** | **AIC** | **BIC** | **logLik** | **deviance** | **Chisq** | **Df** | **p-value** | **adj p-val** | **AIC** | **BIC** | **logLik** | **deviance** | **Chisq** | **Df** | **p-value** | **adj p-val** |
| IgA | Nct | Reduced | 1837.1 | 1901.0 | -905.6 | 1811.1 |  |  |  |  | 428.3 | 476.3 | -202.2 | 404.3 |  |  |  |  |
| Full | 1841.8 | 1935.2 | -901.9 | 1803.8 | 7.302 | 6 | 0.294 | 0.392 | 434.9 | 502.9 | -200.5 | 400.9 | 3.400 | 5 | 0.639 | 0.990 |
| Nfl | Reduced | 2292.8 | 2356.7 | -1133.4 | 2266.8 |  |  |  |  | 524.3 | 572.3 | -250.2 | 500.3 |  |  |  |  |
| Full | 2293.2 | 2386.6 | -1127.6 | 2255.2 | 11.577 | 6 | 0.072 | 0.310 | 532.1 | 600.0 | -249.0 | 498.1 | 2.217 | 5 | 0.818 | 0.990 |
| RBD | Reduced | 1774.2 | 1838.1 | -874.1 | 1748.2 |  |  |  |  | 712.5 | 760.4 | -344.2 | 688.5 |  |  |  |  |
| Full | 1775.4 | 1868.8 | -868.7 | 1737.4 | 10.802 | 6 | 0.095 | 0.325 | 720.8 | 788.7 | -343.4 | 686.8 | 1.668 | 5 | 0.893 | 0.990 |
| S | Reduced | 1749.5 | 1813.4 | -861.7 | 1723.5 |  |  |  |  | 699.1 | 747.1 | -337.6 | 675.1 |  |  |  |  |
| Full | 1753.5 | 1846.9 | -857.7 | 1715.5 | 8.002 | 6 | 0.238 | 0.336 | 706.5 | 774.5 | -336.3 | 672.5 | 2.613 | 5 | 0.759 | 0.990 |
| S Beta | Reduced | 1047.2 | 1111.1 | -510.6 | 1021.2 |  |  |  |  | 372.2 | 420.2 | -174.1 | 348.2 |  |  |  |  |
| Full | 1053.9 | 1147.3 | -508.0 | 1015.9 | 5.279 | 6 | 0.509 | 0.555 | 378.6 | 446.5 | -172.3 | 344.6 | 3.679 | 5 | 0.597 | 0.990 |
| S Delta | Reduced | 1500.9 | 1564.8 | -737.5 | 1474.9 |  |  |  |  | 516.2 | 564.2 | -246.1 | 492.2 |  |  |  |  |
| Full | 1504.3 | 1597.7 | -733.2 | 1466.3 | 8.571 | 6 | 0.199 | 0.334 | 524.2 | 592.2 | -245.1 | 490.2 | 1.997 | 5 | 0.850 | 0.990 |
| S1 | Reduced | 1895.7 | 1959.6 | -934.9 | 1869.7 |  |  |  |  | 774.2 | 822.1 | -375.1 | 750.2 |  |  |  |  |
| Full | 1898.6 | 1992.0 | -930.3 | 1860.6 | 9.131 | 6 | 0.166 | 0.334 | 782.5 | 850.4 | -374.2 | 748.5 | 1.716 | 5 | 0.887 | 0.990 |
| S2 | Reduced | 1597.7 | 1661.6 | -785.8 | 1571.7 |  |  |  |  | 518.8 | 566.8 | -247.4 | 494.8 |  |  |  |  |
| Full | 1601.0 | 1694.4 | -781.5 | 1563.0 | 8.619 | 6 | 0.196 | 0.334 | 526.9 | 594.8 | -246.4 | 492.9 | 1.909 | 5 | 0.862 | 0.990 |
| IgG | Nct | Reduced | 1299.4 | 1363.3 | -636.7 | 1273.4 |  |  |  |  | 638.8 | 686.8 | -307.4 | 614.8 |  |  |  |  |
| Full | 1305.3 | 1398.7 | -633.7 | 1267.3 | 6.053 | 6 | 0.417 | 0.501 | 647.5 | 715.5 | -306.8 | 613.5 | 1.289 | 5 | 0.936 | 0.990 |
| Nfl | Reduced | 1717.6 | 1781.5 | -845.8 | 1691.6 |  |  |  |  | 723.5 | 771.5 | -349.8 | 699.5 |  |  |  |  |
| Full | 1715.7 | 1809.2 | -838.9 | 1677.7 | 13.820 | 6 | 0.032 | 0.226 | 733.0 | 800.9 | -349.5 | 699.0 | 0.565 | 5 | 0.990 | 0.990 |
| RBD | Reduced | 1996.4 | 2060.3 | -985.2 | 1970.4 |  |  |  |  | 746.7 | 794.7 | -361.3 | 722.7 |  |  |  |  |
| Full | 1998.8 | 2092.2 | -980.4 | 1960.8 | 9.608 | 6 | 0.142 | 0.334 | 754.4 | 822.4 | -360.2 | 720.4 | 2.272 | 5 | 0.810 | 0.990 |
| S | Reduced | 1741.5 | 1805.4 | -857.7 | 1715.5 |  |  |  |  | 682.5 | 730.5 | -329.2 | 658.5 |  |  |  |  |
| Full | 1743.2 | 1836.6 | -852.6 | 1705.2 | 10.261 | 6 | 0.114 | 0.334 | 691.4 | 759.4 | -328.7 | 657.4 | 1.061 | 5 | 0.958 | 0.990 |
| S Beta | Reduced | 930.0 | 993.9 | -452.0 | 904.0 |  |  |  |  | 495.1 | 543.1 | -235.5 | 471.1 |  |  |  |  |
| Full | 928.0 | 1021.4 | -445.0 | 890.0 | 13.938 | 6 | 0.030 | 0.226 | 501.8 | 569.7 | -233.9 | 467.8 | 3.326 | 5 | 0.650 | 0.990 |
| S Delta | Reduced | 1079.2 | 1143.1 | -526.6 | 1053.2 |  |  |  |  | 513.9 | 561.9 | -244.9 | 489.9 |  |  |  |  |
| Full | 1076.4 | 1169.8 | -519.2 | 1038.4 | 14.757 | 6 | 0.022 | 0.226 | 521.7 | 589.7 | -243.9 | 487.7 | 2.138 | 5 | 0.830 | 0.990 |
| S1 | Reduced | 2049.9 | 2113.8 | -1011.9 | 2023.9 |  |  |  |  | 763.4 | 811.3 | -369.7 | 739.4 |  |  |  |  |
| Full | 2053.5 | 2146.9 | -1007.7 | 2015.5 | 8.421 | 6 | 0.209 | 0.334 | 770.8 | 838.8 | -368.4 | 736.8 | 2.506 | 5 | 0.776 | 0.990 |
| S2 | Reduced | 1067.4 | 1131.3 | -520.7 | 1041.4 |  |  |  |  | 527.3 | 575.3 | -251.6 | 503.3 |  |  |  |  |
| Full | 1066.1 | 1159.5 | -514.0 | 1028.1 | 13.357 | 6 | 0.038 | 0.226 | 535.0 | 602.9 | -250.5 | 501.0 | 2.345 | 5 | 0.800 | 0.990 |
| IgM | Nct | Reduced | 1763.0 | 1826.9 | -868.5 | 1737.0 |  |  |  |  | 795.5 | 843.5 | -385.7 | 771.5 |  |  |  |  |
| Full | 1766.9 | 1860.3 | -864.5 | 1728.9 | 8.083 | 6 | 0.232 | 0.336 | 802.4 | 870.4 | -384.2 | 768.4 | 3.084 | 5 | 0.687 | 0.990 |
| Nfl | Reduced | 1425.3 | 1489.2 | -699.6 | 1399.3 |  |  |  |  | 506.7 | 554.7 | -241.3 | 482.7 |  |  |  |  |
| Full | 1432.4 | 1525.8 | -697.2 | 1394.4 | 4.913 | 6 | 0.555 | 0.579 | 514.8 | 582.8 | -240.4 | 480.8 | 1.870 | 5 | 0.867 | 0.990 |
| RBD | Reduced | 1350.1 | 1414.0 | -662.1 | 1324.1 |  |  |  |  | 427.1 | 475.0 | -201.5 | 403.1 |  |  |  |  |
| Full | 1350.7 | 1444.2 | -656.4 | 1312.7 | 11.374 | 6 | 0.077 | 0.310 | 435.4 | 503.4 | -200.7 | 401.4 | 1.615 | 5 | 0.899 | 0.990 |
| S | Reduced | 1283.9 | 1347.8 | -628.9 | 1257.9 |  |  |  |  | 441.3 | 489.3 | -208.7 | 417.3 |  |  |  |  |
| Full | 1286.6 | 1380.0 | -624.3 | 1248.6 | 9.255 | 6 | 0.160 | 0.334 | 450.2 | 518.1 | -208.1 | 416.2 | 1.149 | 5 | 0.950 | 0.990 |
| S Beta | Reduced | 600.4 | 664.3 | -287.2 | 574.4 |  |  |  |  | 236.5 | 284.4 | -106.2 | 212.5 |  |  |  |  |
| Full | 610.3 | 703.7 | -286.1 | 572.3 | 2.152 | 6 | 0.905 | 0.905 | 245.2 | 313.1 | -105.6 | 211.2 | 1.305 | 5 | 0.934 | 0.990 |
| S Delta | Reduced | 1239.4 | 1303.3 | -606.7 | 1213.4 |  |  |  |  | 392.7 | 440.6 | -184.3 | 368.7 |  |  |  |  |
| Full | 1245.7 | 1339.1 | -603.9 | 1207.7 | 5.679 | 6 | 0.460 | 0.526 | 401.5 | 469.4 | -183.7 | 367.5 | 1.194 | 5 | 0.945 | 0.990 |
| S1 | Reduced | 1413.7 | 1477.6 | -693.9 | 1387.7 |  |  |  |  | 520.6 | 568.5 | -248.3 | 496.6 |  |  |  |  |
| Full | 1417.0 | 1510.4 | -689.5 | 1379.0 | 8.746 | 6 | 0.188 | 0.334 | 528.2 | 596.1 | -247.1 | 494.2 | 2.367 | 5 | 0.796 | 0.990 |
| S2 | Reduced | 1190.2 | 1254.1 | -582.1 | 1164.2 |  |  |  |  | 554.4 | 602.4 | -265.2 | 530.4 |  |  |  |  |
| Full | 1195.2 | 1288.6 | -578.6 | 1157.2 | 6.986 | 6 | 0.322 | 0.407 | 562.8 | 630.8 | -264.4 | 528.8 | 1.604 | 5 | 0.901 | 0.990 |
| NEUTRALIZATION | | | | | | | | | | |  | | | | | | | |
|  | **Antigen** | **Model** | **AIC** | **BIC** | **logLik** | **deviance** | **Chisq** | **Df** | **p-value** | **adj p-val** |
| Wuhan | Reduced | -649.4 | -604.2 | 335.7 | -671.4 |  | 11 |  |  |
| Full | -648.2 | -598.8 | 336.1 | -672.2 | 0.799 | 12 | 0.371 | 0.541 |
| Alpha | Reduced | -515.6 | -470.4 | 268.8 | -537.6 |  | 11 |  |  |
| Full | -515.3 | -466.0 | 269.7 | -539.3 | 1.705 | 12 | 0.192 | 0.541 |
| Beta | Reduced | -1175.1 | -1129.9 | 598.6 | -1197.1 |  | 11 |  |  |
| Full | -1173.7 | -1124.4 | 598.8 | -1197.7 | 0.569 | 12 | 0.451 | 0.541 |
| Gamma | Reduced | -1167.7 | -1122.5 | 594.9 | -1189.7 |  | 11 |  |  |
| Full | -1165.9 | -1116.5 | 594.9 | -1189.9 | 0.158 | 12 | 0.691 | 0.691 |
| Delta | Reduced | -378.7 | -333.4 | 200.3 | -400.7 |  | 11 |  |  |
| Full | -378.5 | -329.1 | 201.2 | -402.5 | 1.804 | 12 | 0.179 | 0.541 |
| Omicron | Reduced | -2354.7 | -2309.5 | 1188.4 | -2376.7 |  | 11 |  |  |
| Full | -2353.4 | -2304.1 | 1188.7 | -2377.4 | 0.651 | 12 | 0.420 | 0.541 |

**Table S 5 Non-parametric comparisons of antibody, neutralization, and cellular immune responses across treatment arms.**

Wilcoxon rank-sum tests were used to compare ciclesonide-nitazoxanide (Cicle-Nita) vs Paracetamol (and artesunate-amodiaquine with ivermectin (ASAQ-IVM) vs Paracetamol for serology) across time points for antibody levels (IgA, IgG, IgM), neutralizing activity against SARS-CoV-2 variants (Wuhan, Alpha, Beta, Gamma, Delta, Omicron), and cellular responses (S-specific B cells and CD4+ and CD8+ AIM+ T cells). Raw and Benjamini-Hochberg-adjusted p-values are reported. No significant differences in antibody, neutralizing, or cellular immune responses were detected between treatment groups by nonparametric analysis.

| ANTIBODY LEVELS | | | | | | | | | | | | | |
| --- | --- | --- | --- | --- | --- | --- | --- | --- | --- | --- | --- | --- | --- |
|  | | **Cicle-Nita vs Paracetamol** | | | | | | **ASAQ-IVM vs Paracetamol** | | | | | |
| **IgA** | | **IgG** | | **IgM** | | **IgA** | | **IgG** | | **IgM** | |
| p-value | adj p-val | p-value | adj p-val | p-value | adj p-val | p-value | adj p-val | p-value | adj p-val | p-value | adj p-val |
| Nct | D0 | 0.220 | 0.649 | 0.575 | 0.804 | 0.147 | 0.514 | 0.711 | 0.931 | 0.811 | 0.880 | 0.760 | 0.886 |
| D7 | 0.278 | 0.649 | 0.788 | 0.820 | 0.329 | 0.767 | 0.294 | 0.686 | 0.376 | 0.724 | 0.940 | 0.940 |
| D21 | 0.818 | 0.821 | 0.542 | 0.804 | 0.857 | 0.972 | 0.228 | 0.686 | 0.352 | 0.724 | 0.729 | 0.886 |
| M1 | 0.821 | 0.821 | 0.316 | 0.738 | 0.899 | 0.972 | 0.498 | 0.871 | 0.282 | 0.724 | 0.323 | 0.886 |
| M3 | 0.795 | 0.821 | 0.239 | 0.738 | 0.972 | 0.972 | 0.128 | 0.686 | 0.414 | 0.724 | 0.429 | 0.886 |
| M6 | 0.125 | 0.649 | 0.082 | 0.572 | 0.094 | 0.514 | 0.798 | 0.931 | 0.880 | 0.880 | 0.190 | 0.886 |
| M12 | 0.627 | 0.821 | 0.820 | 0.820 | 0.643 | 0.972 | 1.000 | 1.000 | 0.667 | 0.880 | 0.667 | 0.886 |
| Nfl | D0 | 0.697 | 0.813 | 0.142 | 0.331 | 0.193 | 0.861 | 0.430 | 0.530 | 0.483 | 1.000 | 0.811 | 0.947 |
| D7 | 0.390 | 0.694 | 0.537 | 0.627 | 0.651 | 0.861 | 0.455 | 0.530 | 0.425 | 1.000 | 0.498 | 0.899 |
| D21 | 0.396 | 0.694 | 0.697 | 0.697 | 0.710 | 0.861 | 0.181 | 0.530 | 0.660 | 1.000 | 0.724 | 0.947 |
| M1 | 0.182 | 0.694 | 0.190 | 0.332 | 0.312 | 0.861 | 0.353 | 0.530 | 0.559 | 1.000 | 0.130 | 0.711 |
| M3 | 0.268 | 0.694 | 0.030 | 0.207 | 0.941 | 0.941 | 0.349 | 0.530 | 0.863 | 1.000 | 0.513 | 0.899 |
| M6 | 0.613 | 0.813 | 0.081 | 0.284 | 0.448 | 0.861 | 0.233 | 0.530 | 0.787 | 1.000 | 0.203 | 0.711 |
| M12 | 0.960 | 0.960 | 0.538 | 0.627 | 0.738 | 0.861 | 1.000 | 1.000 | 1.000 | 1.000 | 1.000 | 1.000 |
| RBD | D0 | 0.176 | 0.819 | 0.284 | 0.663 | 0.372 | 0.892 | 0.711 | 0.991 | 0.470 | 1.000 | 0.930 | 0.930 |
| D7 | 0.819 | 0.819 | 0.993 | 0.993 | 0.532 | 0.892 | 0.956 | 0.991 | 0.872 | 1.000 | 0.215 | 0.481 |
| D21 | 0.498 | 0.819 | 0.620 | 0.868 | 0.782 | 0.892 | 0.991 | 0.991 | 0.867 | 1.000 | 0.468 | 0.547 |
| M1 | 0.611 | 0.819 | 0.408 | 0.714 | 0.339 | 0.892 | 0.343 | 0.991 | 0.501 | 1.000 | 0.307 | 0.481 |
| M3 | 0.276 | 0.819 | 0.145 | 0.663 | 0.884 | 0.892 | 0.636 | 0.991 | 0.897 | 1.000 | 0.344 | 0.481 |
| M6 | 0.761 | 0.819 | 0.271 | 0.663 | 0.892 | 0.892 | 0.693 | 0.991 | 0.659 | 1.000 | 0.188 | 0.481 |
| M12 | 0.441 | 0.819 | 0.897 | 0.993 | 0.872 | 0.892 | 0.667 | 0.991 | 1.000 | 1.000 | 0.333 | 0.481 |
| S | D0 | 0.682 | 0.742 | 0.555 | 0.777 | 0.065 | 0.457 | 0.822 | 0.959 | 0.822 | 0.959 | 0.328 | 0.389 |
| D7 | 0.650 | 0.742 | 0.888 | 0.980 | 0.577 | 0.758 | 0.713 | 0.959 | 0.788 | 0.959 | 0.093 | 0.389 |
| D21 | 0.223 | 0.632 | 0.308 | 0.556 | 0.476 | 0.758 | 0.783 | 0.959 | 0.625 | 0.959 | 0.273 | 0.389 |
| M1 | 0.271 | 0.632 | 0.206 | 0.556 | 0.168 | 0.589 | 0.650 | 0.959 | 0.390 | 0.959 | 0.390 | 0.390 |
| M3 | 0.192 | 0.632 | 0.065 | 0.457 | 0.526 | 0.758 | 0.434 | 0.959 | 0.667 | 0.959 | 0.230 | 0.389 |
| M6 | 0.742 | 0.742 | 0.318 | 0.556 | 0.804 | 0.804 | 0.996 | 0.996 | 0.700 | 0.959 | 0.135 | 0.389 |
| M12 | 0.737 | 0.742 | 0.980 | 0.980 | 0.650 | 0.758 | 0.667 | 0.959 | 1.000 | 1.000 | 0.333 | 0.389 |
| S Beta | D0 | 0.567 | 0.929 | 0.294 | 0.825 | 0.443 | 0.959 | 0.471 | 0.959 | 0.828 | 1.000 | 0.543 | 0.717 |
| D7 | 0.655 | 0.929 | 0.253 | 0.825 | 0.578 | 0.959 | 0.930 | 0.959 | 0.383 | 0.841 | 0.194 | 0.717 |
| D21 | 0.510 | 0.929 | 0.707 | 0.825 | 0.949 | 0.959 | 0.595 | 0.959 | 0.333 | 0.841 | 0.929 | 0.929 |
| M1 | 0.728 | 0.929 | 0.616 | 0.825 | 0.959 | 0.959 | 0.221 | 0.959 | 0.072 | 0.501 | 0.379 | 0.717 |
| M3 | 0.420 | 0.929 | 0.603 | 0.825 | 0.745 | 0.959 | 0.959 | 0.959 | 0.480 | 0.841 | 0.614 | 0.717 |
| M6 | 0.809 | 0.929 | 0.581 | 0.825 | 0.761 | 0.959 | 0.837 | 0.959 | 0.888 | 1.000 | 0.414 | 0.717 |
| M12 | 0.929 | 0.929 | 0.891 | 0.891 | 0.580 | 0.959 | 0.667 | 0.959 | 1.000 | 1.000 | 0.333 | 0.717 |
| S Delta | D0 | 0.363 | 0.705 | 0.213 | 0.496 | 0.504 | 0.899 | 0.994 | 1.000 | 0.987 | 1.000 | 0.880 | 0.880 |
| D7 | 0.565 | 0.705 | 0.529 | 0.628 | 0.858 | 0.899 | 0.858 | 1.000 | 0.522 | 0.913 | 0.323 | 0.672 |
| D21 | 0.508 | 0.705 | 0.538 | 0.628 | 0.515 | 0.899 | 0.434 | 1.000 | 0.340 | 0.913 | 0.687 | 0.801 |
| M1 | 0.316 | 0.705 | 0.291 | 0.510 | 0.101 | 0.707 | 0.994 | 1.000 | 0.182 | 0.913 | 0.338 | 0.672 |
| M3 | 0.251 | 0.705 | 0.067 | 0.468 | 0.359 | 0.899 | 0.458 | 1.000 | 0.394 | 0.913 | 0.513 | 0.719 |
| M6 | 0.705 | 0.705 | 0.196 | 0.496 | 0.899 | 0.899 | 0.890 | 1.000 | 0.948 | 1.000 | 0.384 | 0.672 |
| M12 | 0.690 | 0.705 | 1.000 | 1.000 | 0.741 | 0.899 | 1.000 | 1.000 | 1.000 | 1.000 | 0.333 | 0.672 |
| S1 | D0 | 0.288 | 0.672 | 0.342 | 0.599 | 0.147 | 0.935 | 0.645 | 0.973 | 0.503 | 1.000 | 0.928 | 0.928 |
| D7 | 0.880 | 0.880 | 0.968 | 0.993 | 0.647 | 0.935 | 0.973 | 0.973 | 0.782 | 1.000 | 0.349 | 0.502 |
| D21 | 0.525 | 0.672 | 0.605 | 0.847 | 0.739 | 0.935 | 0.920 | 0.973 | 0.789 | 1.000 | 0.359 | 0.502 |
| M1 | 0.428 | 0.672 | 0.253 | 0.599 | 0.289 | 0.935 | 0.447 | 0.973 | 0.441 | 1.000 | 0.304 | 0.502 |
| M3 | 0.263 | 0.672 | 0.086 | 0.599 | 0.747 | 0.935 | 0.649 | 0.973 | 0.932 | 1.000 | 0.339 | 0.502 |
| M6 | 0.576 | 0.672 | 0.304 | 0.599 | 0.935 | 0.935 | 0.800 | 0.973 | 0.469 | 1.000 | 0.099 | 0.502 |
| M12 | 0.544 | 0.672 | 0.993 | 0.993 | 0.836 | 0.935 | 0.667 | 0.973 | 1.000 | 1.000 | 0.667 | 0.778 |
| S2 | D0 | 0.256 | 0.855 | 0.146 | 0.509 | 0.234 | 0.547 | 0.791 | 0.936 | 0.724 | 1.000 | 0.806 | 0.942 |
| D7 | 0.290 | 0.855 | 0.616 | 0.799 | 0.719 | 0.839 | 0.802 | 0.936 | 0.383 | 0.670 | 0.581 | 0.942 |
| D21 | 0.734 | 0.914 | 0.810 | 0.810 | 0.549 | 0.769 | 0.331 | 0.936 | 0.302 | 0.670 | 0.942 | 0.942 |
| M1 | 0.804 | 0.914 | 0.352 | 0.616 | 0.084 | 0.547 | 0.793 | 0.936 | 0.135 | 0.670 | 0.527 | 0.942 |
| M3 | 0.914 | 0.914 | 0.143 | 0.509 | 0.358 | 0.627 | 0.461 | 0.936 | 0.225 | 0.670 | 0.938 | 0.942 |
| M6 | 0.655 | 0.914 | 0.297 | 0.616 | 0.927 | 0.927 | 0.796 | 0.936 | 0.859 | 1.000 | 0.300 | 0.942 |
| M12 | 0.366 | 0.855 | 0.685 | 0.799 | 0.203 | 0.547 | 1.000 | 1.000 | 1.000 | 1.000 | 0.333 | 0.942 |

| NEUTRALIZATION | | | | | | | | | | | | | |
| --- | --- | --- | --- | --- | --- | --- | --- | --- | --- | --- | --- | --- | --- |
|  | | **Cicle-Nita vs Paracetamol** | | | | | | | | | | | |
| **Wuhan** | | **Alpha** | | **Beta** | | **Gamma** | | **Delta** | | **Omicron** | |
| p-value | adj p-val | p-value | adj p-val | p-value | adj p-val | p-value | adj p-val | p-value | adj p-val | p-value | adj p-val |
| Neutr | D0 | 0.357 | 0.714 | 0.891 | 0.943 | 0.071 | 0.354 | 0.919 | 0.970 | 0.787 | 0.833 | 0.349 | 0.833 |
| D21 | 0.959 | 0.959 | 0.750 | 0.943 | 0.925 | 0.925 | 0.960 | 0.970 | 0.741 | 0.833 | 0.439 | 0.833 |
| M3 | 0.429 | 0.714 | 0.357 | 0.943 | 0.525 | 0.925 | 0.688 | 0.970 | 0.145 | 0.724 | 0.666 | 0.833 |
| M6 | 0.428 | 0.714 | 0.943 | 0.943 | 0.905 | 0.925 | 0.489 | 0.970 | 0.602 | 0.833 | 0.906 | 0.906 |
| M12 | 0.921 | 0.959 | 0.804 | 0.943 | 0.690 | 0.925 | 0.970 | 0.970 | 0.833 | 0.833 | 0.652 | 0.833 |

| CELLULAR DATA | | | | | | | | | | | | | |
| --- | --- | --- | --- | --- | --- | --- | --- | --- | --- | --- | --- | --- | --- |
| Cicle-Nita vs Paracetamol | | | | | | | | | | | | | |
| T-cells | | | | **Spike-specific B cells** | | | | | | | | | |
|  | | p-value | adj p-val |  | | p-value | adj p-val |  | p-value | adj p-val |  | p-value | adj p-val |
| CD4+ | D0 | 0.794 | 0.970 | D0 | Spike Bcell | 0.523 | 0.986 | Activated | 0.700 | 0.986 | Naïve | 0.189 | 0.986 |
| D21 | 0.970 | 0.970 | D21 | 0.818 | 0.986 | 0.173 | 0.986 | 0.986 | 0.986 |
| M3 | 0.866 | 0.970 | M3 | 0.590 | 0.986 | 0.573 | 0.986 | 0.766 | 0.986 |
| CD8+ | D0 | 0.447 | 0.970 | D0 | Memory | 0.201 | 0.986 | Memory IgG+ | 0.875 | 0.986 | Memory Plasma | 0.484 | 0.986 |
| D21 | 0.605 | 0.970 | D21 | 0.045 | 0.768 | 0.813 | 0.986 | 0.023 | 0.574 |
| M3 | 0.377 | 0.970 | M3 | 0.757 | 0.986 | 0.784 | 0.986 | 0.496 | 0.986 |
|  | | | | D0 | Transitional | 0.277 | 0.986 | Plasmblasts | 0.146 | 0.986 | Terminal Plasma | 0.550 | 0.986 |
| D21 | 0.954 | 0.986 | 0.465 | 0.986 | 0.959 | 0.986 |
| M3 | 0.939 | 0.986 | 0.973 | 0.986 | 0.629 | 0.986 |

**Table S 6 Mixed model estimates comparing symptomatic and asymptomatic participants for antibody responses across isotypes, analytes, and time points**

Linear mixed-effects models (LMMs) were used to estimate differences in antibody levels between symptomatic and asymptomatic participants, including fixed effects for time, site, group, and their interaction. The table reports estimates, standard errors, 95% confidence intervals, and p-values for the group-by-time interaction terms, stratified by isotype (IgA, IgG, IgM) and antigen. No significant or consistent trends were detected across time points (M1, M3, M6).

| Isotype Analyte | Term | Estimate | Std error | Conf low | Conf high | p-value |
| --- | --- | --- | --- | --- | --- | --- |
| IgA Nct | tpM1: Symptomatic | 0.022 | 0.173 | -0.317 | 0.360 | 0.899 |
| IgA Nct | tpM3: Symptomatic | -0.103 | 0.180 | -0.457 | 0.251 | 0.569 |
| IgA Nct | tpM6: Symptomatic | 0.014 | 0.188 | -0.354 | 0.382 | 0.942 |
| IgA Nfl | tpM1: Symptomatic | 0.134 | 0.212 | -0.281 | 0.549 | 0.527 |
| IgA Nfl | tpM3: Symptomatic | -0.041 | 0.222 | -0.475 | 0.394 | 0.855 |
| IgA Nfl | tpM6: Symptomatic | -0.126 | 0.230 | -0.577 | 0.326 | 0.585 |
| IgA RBD | tpM1: Symptomatic | 0.168 | 0.191 | -0.206 | 0.542 | 0.377 |
| IgA RBD | tpM3: Symptomatic | 0.047 | 0.199 | -0.343 | 0.437 | 0.812 |
| IgA RBD | tpM6: Symptomatic | -0.162 | 0.207 | -0.568 | 0.244 | 0.435 |
| IgA S | tpM1: Symptomatic | 0.192 | 0.192 | -0.184 | 0.567 | 0.318 |
| IgA S | tpM3: Symptomatic | 0.049 | 0.200 | -0.343 | 0.441 | 0.808 |
| IgA S | tpM6: Symptomatic | -0.104 | 0.208 | -0.512 | 0.304 | 0.616 |
| IgA S beta | tpM1: Symptomatic | 0.043 | 0.124 | -0.199 | 0.286 | 0.725 |
| IgA S beta | tpM3: Symptomatic | -0.061 | 0.129 | -0.315 | 0.192 | 0.635 |
| IgA S beta | tpM6: Symptomatic | -0.074 | 0.134 | -0.338 | 0.189 | 0.580 |
| IgA S delta | tpM1: Symptomatic | 0.216 | 0.163 | -0.103 | 0.535 | 0.184 |
| IgA S delta | tpM3: Symptomatic | 0.050 | 0.170 | -0.284 | 0.384 | 0.768 |
| IgA S delta | tpM6: Symptomatic | -0.027 | 0.177 | -0.374 | 0.320 | 0.880 |
| IgA S1 | tpM1: Symptomatic | 0.166 | 0.206 | -0.239 | 0.570 | 0.422 |
| IgA S1 | tpM3: Symptomatic | 0.023 | 0.215 | -0.398 | 0.445 | 0.913 |
| IgA S1 | tpM6: Symptomatic | -0.160 | 0.224 | -0.599 | 0.279 | 0.474 |
| IgA S2 | tpM1: Symptomatic | 0.250 | 0.175 | -0.092 | 0.592 | 0.152 |
| IgA S2 | tpM3: Symptomatic | 0.032 | 0.183 | -0.326 | 0.391 | 0.860 |
| IgA S2 | tpM6: Symptomatic | 0.003 | 0.190 | -0.370 | 0.376 | 0.988 |
| IgG Nct | tpM1: Symptomatic | 0.159 | 0.161 | -0.156 | 0.475 | 0.322 |
| IgG Nct | tpM3: Symptomatic | 0.204 | 0.169 | -0.127 | 0.535 | 0.227 |
| IgG Nct | tpM6: Symptomatic | -0.271 | 0.175 | -0.615 | 0.073 | 0.123 |
| IgG Nfl | tpM1: Symptomatic | -0.056 | 0.209 | -0.466 | 0.354 | 0.790 |
| IgG Nfl | tpM3: Symptomatic | -0.072 | 0.220 | -0.503 | 0.360 | 0.745 |
| IgG Nfl | tpM6: Symptomatic | -0.546 | 0.228 | -0.994 | -0.099 | 0.057 |
| IgG RBD | tpM1: Symptomatic | 0.330 | 0.219 | -0.099 | 0.759 | 0.132 |
| IgG RBD | tpM3: Symptomatic | 0.253 | 0.228 | -0.195 | 0.701 | 0.269 |
| IgG RBD | tpM6: Symptomatic | -0.292 | 0.238 | -0.758 | 0.174 | 0.219 |
| IgG S | tpM1: Symptomatic | 0.346 | 0.207 | -0.060 | 0.751 | 0.095 |
| IgG S | tpM3: Symptomatic | 0.235 | 0.216 | -0.189 | 0.658 | 0.278 |
| IgG S | tpM6: Symptomatic | -0.310 | 0.225 | -0.751 | 0.131 | 0.168 |
| IgG S beta | tpM1: Symptomatic | 0.264 | 0.135 | -0.002 | 0.529 | 0.052 |
| IgG S beta | tpM3: Symptomatic | 0.200 | 0.142 | -0.078 | 0.478 | 0.159 |
| IgG S beta | tpM6: Symptomatic | -0.271 | 0.147 | -0.560 | 0.018 | 0.066 |
| IgG S delta | tpM1: Symptomatic | 0.278 | 0.152 | -0.021 | 0.577 | 0.068 |
| IgG S delta | tpM3: Symptomatic | 0.199 | 0.160 | -0.114 | 0.513 | 0.213 |
| IgG S delta | tpM6: Symptomatic | -0.248 | 0.166 | -0.573 | 0.078 | 0.136 |
| IgG S1 | tpM1: Symptomatic | 0.422 | 0.233 | -0.035 | 0.879 | 0.071 |
| IgG S1 | tpM3: Symptomatic | 0.338 | 0.244 | -0.140 | 0.816 | 0.166 |
| IgG S1 | tpM6: Symptomatic | -0.283 | 0.253 | -0.780 | 0.214 | 0.265 |
| IgG S2 | tpM1: Symptomatic | 0.253 | 0.157 | -0.056 | 0.561 | 0.109 |
| IgG S2 | tpM3: Symptomatic | 0.198 | 0.165 | -0.126 | 0.522 | 0.230 |
| IgG S2 | tpM6: Symptomatic | -0.246 | 0.172 | -0.582 | 0.091 | 0.152 |
| IgM Nct | tpM1: Symptomatic | 0.260 | 0.163 | -0.059 | 0.579 | 0.110 |
| IgM Nct | tpM3: Symptomatic | 0.058 | 0.169 | -0.274 | 0.390 | 0.731 |
| IgM Nct | tpM6: Symptomatic | 0.071 | 0.176 | -0.275 | 0.416 | 0.689 |
| IgM Nfl | tpM1: Symptomatic | 0.318 | 0.144 | 0.036 | 0.600 | 0.027 |
| IgM Nfl | tpM3: Symptomatic | 0.125 | 0.150 | -0.169 | 0.419 | 0.404 |
| IgM Nfl | tpM6: Symptomatic | 0.090 | 0.156 | -0.216 | 0.396 | 0.566 |
| IgM RBD | tpM1: Symptomatic | 0.323 | 0.155 | 0.019 | 0.627 | 0.037 |
| IgM RBD | tpM3: Symptomatic | 0.150 | 0.162 | -0.168 | 0.468 | 0.355 |
| IgM RBD | tpM6: Symptomatic | 0.113 | 0.169 | -0.218 | 0.443 | 0.503 |
| IgM S | tpM1: Symptomatic | 0.242 | 0.162 | -0.077 | 0.560 | 0.137 |
| IgM S | tpM3: Symptomatic | 0.080 | 0.170 | -0.254 | 0.414 | 0.639 |
| IgM S | tpM6: Symptomatic | 0.065 | 0.177 | -0.282 | 0.412 | 0.713 |
| IgM S beta | tpM1: Symptomatic | 0.222 | 0.097 | 0.032 | 0.411 | 0.022 |
| IgM S beta | tpM3: Symptomatic | 0.109 | 0.101 | -0.089 | 0.306 | 0.281 |
| IgM S beta | tpM6: Symptomatic | 0.087 | 0.105 | -0.119 | 0.293 | 0.407 |
| IgM S delta | tpM1: Symptomatic | 0.271 | 0.134 | 0.008 | 0.533 | 0.043 |
| IgM S delta | tpM3: Symptomatic | 0.110 | 0.140 | -0.165 | 0.385 | 0.432 |
| IgM S delta | tpM6: Symptomatic | 0.096 | 0.146 | -0.190 | 0.382 | 0.512 |
| IgM S1 | tpM1: Symptomatic | 0.324 | 0.167 | -0.004 | 0.652 | 0.053 |
| IgM S1 | tpM3: Symptomatic | 0.181 | 0.175 | -0.162 | 0.524 | 0.301 |
| IgM S1 | tpM6: Symptomatic | 0.130 | 0.182 | -0.227 | 0.487 | 0.474 |
| IgM S2 | tpM1: Symptomatic | 0.216 | 0.141 | -0.061 | 0.492 | 0.126 |
| IgM S2 | tpM3: Symptomatic | 0.071 | 0.148 | -0.218 | 0.360 | 0.631 |
| IgM S2 | tpM6: Symptomatic | 0,088 | 0,153 | -0,213 | 0,388 | 0,568 |

**Table S 7 Non-parametric comparisons of cellular immune responses across clinical and demographic variables.**

Kruskal-Wallis or Wilcoxon tests were used to compare SARS-CoV-2-specific T-cell and B-cell responses at different time points (D0, D21, M3) across participant subgroups defined by baseline serostatus, vaccination, epidemic wave, site, age, sex, BMI, comorbidities, HIV status, number of symptoms, and symptom duration. P-values <0.05 are highlighted in bold. Adjusted p-values (Benjamini-Hochberg correction) are shown; shaded cells indicate significant adjusted p-values (<0.05).

|  |  | **seropositivity at baseline** | | **vaccination at baseline** | | **COVID-19 wave** | | **site** | | **age** | | **sex** | | **BMI** | | **comorbidities** | | **HIV** | | **number of symptoms at baseline** | | **duration of symptoms** | |
| --- | --- | --- | --- | --- | --- | --- | --- | --- | --- | --- | --- | --- | --- | --- | --- | --- | --- | --- | --- | --- | --- | --- | --- |
| **cell subset** | **tp** | **p value** | **adj p-value** | **p value** | **adj p-value** | **p value** | **adj p-value** | **p value** | **adj p-value** | **p value** | **adj p-value** | **p value** | **adj p-value** | **p value** | **adj p-value** | **p value** | **adj p-value** | **p value** | **adj p-value** | **p value** | **adj p-value** | **p value** | **adj p-value** |
| **T cells** | | | | | | | | | | | | | | | | | | | | | | | |
| CD4+ | D0 | 0.900 | 0.964 | 0.057 | 0.185 | 0.559 | 0.671 | 0.099 | 0.200 | 0.218 | 0.395 | 0.988 | 0.988 | 0.719 | 0.719 | 0.075 | 0.113 | 0.308 | 0.616 | 0.893 | 0.961 | 0.279 | 0.419 |
| D21 | 0.938 | 0.964 | 0.383 | 0.383 | **0.033** | 0.197 | 0.092 | 0.200 | 0.263 | 0.395 | 0.073 | 0.437 | 0.207 | 0.248 | **0.037** | 0.074 | 0.305 | 0.616 | 0.961 | 0.961 | 0.573 | 0.573 |
| M3 | 0.157 | 0.471 | 0.123 | 0.185 | 0.320 | 0.671 | 0.133 | 0.200 | **0.025** | 0.096 | 0.570 | 0.912 | 0.105 | 0.230 | **0.012** | **0.035** | 0.971 | 0.971 | 0.864 | 0.961 | 0.086 | 0.348 |
| CD8+ | D0 | 0.366 | 0.732 | 0.087 | 0.185 | 0.449 | 0.671 | 0.288 | 0.346 | 0.892 | 0.892 | 0.760 | 0.912 | 0.153 | 0.230 | 0.606 | 0.606 | 0.154 | 0.616 | 0.411 | 0.961 | 0.174 | 0.348 |
| D21 | 0.964 | 0.964 | 0.380 | 0.383 | 0.339 | 0.671 | 0.101 | 0.200 | **0.032** | 0.096 | 0.693 | 0.912 | **0.033** | 0.200 | **0.003** | **0.015** | 0.909 | 0.971 | 0.093 | 0.558 | 0.153 | 0.348 |
| M3 | 0.086 | 0.471 | 0.118 | 0.185 | 0.940 | 0.940 | 0.613 | 0.613 | 0.531 | 0.637 | 0.164 | 0.492 | 0.149 | 0.230 | 0.304 | 0.365 | 0.827 | 0.971 | 0.652 | 0.961 | 0.485 | 0.573 |
| **B cells** | | | | | | | | | | | | | | | | | | | | | | | |
| Activated B cells | D0 | 0.846 | 0.947 | 0.993 | 0.993 | 0.064 | 0.592 | **0.016** | 0.198 | 0.226 | 0.596 | 0.771 | 0.855 | 0.803 | 0.960 | 0.949 | 0.969 | 0.505 | 0.805 | 0.816 | 0.950 | 0.749 | 0.944 |
| D21 | 0.237 | 0.677 | 0.173 | 0.733 | 0.082 | 0.592 | 0.251 | 0.593 | 0.350 | 0.607 | 0.100 | 0.496 | 0.389 | 0.928 | 0.659 | 0.935 | 0.781 | 0.905 | 0.266 | 0.549 | 0.160 | 0.944 |
| M3 | 0.463 | 0.834 | 0.376 | 0.787 | 0.095 | 0.592 | 0.137 | 0.480 | 0.490 | 0.656 | 0.535 | 0.788 | 0.784 | 0.960 | 0.538 | 0.935 | 0.281 | 0.801 | 0.123 | 0.369 | 0.128 | 0.944 |
| Activated Spike B cells | D0 | 0.133 | 0.677 | 0.274 | 0.734 | 0.760 | 0.958 | 0.156 | 0.480 | 0.538 | 0.686 | 0.450 | 0.784 | 0.626 | 0.939 | 0.860 | 0.969 | 0.578 | 0.827 | 0.104 | 0.369 | 0.668 | 0.944 |
| D21 | 0.153 | 0.677 | 0.461 | 0.787 | 0.848 | 0.983 | 0.646 | 0.784 | 0.388 | 0.607 | 0.742 | 0.855 | **0.014** | 0.709 | 0.123 | 0.903 | 0.972 | 0.972 | **0.002** | 0.063 | 0.829 | 0.944 |
| M3 | 0.231 | 0.677 | 0.153 | 0.709 | 0.436 | 0.743 | 0.244 | 0.593 | 0.828 | 0.856 | 0.171 | 0.528 | 0.526 | 0.928 | 0.093 | 0.903 | 0.256 | 0.801 | 0.743 | 0.947 | 0.493 | 0.944 |
| Memory B cells | D0 | 0.078 | 0.677 | 0.629 | 0.827 | 0.144 | 0.592 | **0.001** | 0.057 | 0.349 | 0.607 | 0.843 | 0.915 | 0.162 | 0.923 | 0.163 | 0.935 | 0.401 | 0.801 | 0.308 | 0.582 | 0.710 | 0.944 |
| D21 | 0.663 | 0.930 | 0.828 | 0.898 | 0.910 | 0.989 | 0.377 | 0.665 | 0.193 | 0.596 | 0.756 | 0.855 | 0.564 | 0.928 | 0.955 | 0.969 | 0.476 | 0.801 | 0.286 | 0.561 | **0.030** | 0.944 |
| M3 | 0.570 | 0.908 | 0.463 | 0.787 | 0.643 | 0.921 | 0.845 | 0.898 | 0.213 | 0.596 | 0.144 | 0.525 | 0.548 | 0.928 | 0.124 | 0.903 | 0.306 | 0.801 | 0.376 | 0.619 | 0.147 | 0.944 |
| Memory Spike B cells | D0 | 0.874 | 0.947 | 0.762 | 0.863 | 0.093 | 0.592 | 0.135 | 0.480 | 0.631 | 0.734 | 0.679 | 0.839 | 0.612 | 0.939 | 0.313 | 0.935 | 0.965 | 0.972 | 0.636 | 0.901 | 0.511 | 0.944 |
| D21 | 0.890 | 0.947 | 0.778 | 0.863 | 0.918 | 0.989 | 0.587 | 0.768 | **0.035** | 0.573 | 0.306 | 0.624 | 0.709 | 0.943 | 0.931 | 0.969 | 0.380 | 0.801 | 0.512 | 0.768 | 0.211 | 0.944 |
| M3 | 0.748 | 0.930 | 0.611 | 0.827 | 0.789 | 0.958 | 0.543 | 0.768 | 0.252 | 0.596 | 0.435 | 0.784 | 0.486 | 0.928 | 0.453 | 0.935 | 0.255 | 0.801 | 0.118 | 0.369 | 0.567 | 0.944 |
| Memory IgG+ B cells | D0 | 0.210 | 0.677 | 0.274 | 0.734 | **0.017** | 0.436 | **0.002** | 0.062 | 0.447 | 0.633 | 0.085 | 0.484 | 0.491 | 0.928 | **0.035** | 0.784 | 0.431 | 0.801 | 0.114 | 0.369 | 0.762 | 0.944 |
| D21 | 0.452 | 0.834 | 0.138 | 0.709 | 0.137 | 0.592 | 0.324 | 0.661 | 0.097 | 0.592 | 0.126 | 0.525 | 0.884 | 0.963 | 0.691 | 0.935 | 0.211 | 0.801 | 0.269 | 0.549 | 0.266 | 0.944 |
| M3 | 0.446 | 0.834 | 0.571 | 0.809 | **0.007** | 0.356 | 0.606 | 0.773 | 0.417 | 0.609 | 0.572 | 0.810 | 0.846 | 0.960 | 0.270 | 0.935 | 0.389 | 0.801 | 0.212 | 0.537 | 0.349 | 0.944 |
| Memory IgG+ Spike B cells | D0 | 0.366 | 0.780 | 0.230 | 0.733 | 0.910 | 0.989 | 0.156 | 0.480 | 0.616 | 0.734 | **0.039** | 0.312 | 0.693 | 0.943 | 0.668 | 0.935 | 0.181 | 0.801 | 0.807 | 0.950 | 0.336 | 0.944 |
| D21 | 0.296 | 0.755 | 0.206 | 0.733 | 0.460 | 0.743 | **0.046** | 0.434 | 0.075 | 0.573 | 0.264 | 0.621 | 0.814 | 0.960 | 0.955 | 0.969 | 0.175 | 0.801 | 0.366 | 0.619 | 0.497 | 0.944 |
| M3 | 0.729 | 0.930 | 0.069 | 0.709 | 0.335 | 0.712 | 0.391 | 0.665 | 0.108 | 0.592 | 0.245 | 0.621 | 0.121 | 0.923 | 0.329 | 0.935 | 0.957 | 0.972 | 0.970 | 0.993 | 0.851 | 0.944 |
| Memory Plasma B cells | D0 | 0.779 | 0.946 | 0.269 | 0.734 | 0.309 | 0.712 | 0.585 | 0.768 | 0.373 | 0.607 | 0.611 | 0.820 | 0.433 | 0.928 | 0.181 | 0.935 | 0.304 | 0.801 | **0.034** | 0.283 | 0.362 | 0.944 |
| D21 | 0.202 | 0.677 | 0.555 | 0.809 | 0.188 | 0.639 | 0.724 | 0.803 | 0.059 | 0.573 | 0.691 | 0.839 | 0.974 | 0.981 | 0.203 | 0.935 | 0.917 | 0.972 | 0.232 | 0.538 | 0.316 | 0.944 |
| M3 | **0.016** | 0.462 | 0.125 | 0.709 | 0.144 | 0.592 | 0.492 | 0.760 | 0.648 | 0.734 | 0.973 | 0.975 | 0.437 | 0.928 | 0.390 | 0.935 | 0.247 | 0.801 | 0.063 | 0.369 | 0.665 | 0.944 |
| Memory Plasma Spike B cells | D0 | 0.131 | 0.677 | **0.022** | 0.569 | 0.384 | 0.743 | **0.011** | 0.194 | 0.146 | 0.596 | **0.030** | 0.305 | 0.171 | 0.923 | 0.055 | 0.784 | 0.892 | 0.968 | **0.014** | 0.179 | 0.244 | 0.944 |
| D21 | 0.891 | 0.947 | 0.681 | 0.827 | 0.229 | 0.712 | 0.160 | 0.480 | 0.219 | 0.596 | 0.737 | 0.855 | 0.347 | 0.928 | 0.633 | 0.935 | 0.740 | 0.899 | **0.039** | 0.283 | 0.297 | 0.944 |
| M3 | 0.262 | 0.703 | 0.444 | 0.787 | 0.253 | 0.712 | 0.423 | 0.674 | 0.839 | 0.856 | 0.610 | 0.820 | 0.893 | 0.963 | 0.817 | 0.969 | 0.360 | 0.801 | 0.177 | 0.480 | 0.411 | 0.944 |
| Naïve B cells | D0 | 0.936 | 0.956 | 0.517 | 0.809 | 0.175 | 0.638 | 0.348 | 0.665 | 0.287 | 0.596 | 0.158 | 0.528 | 0.486 | 0.928 | 0.404 | 0.935 | 0.622 | 0.857 | 0.629 | 0.901 | 0.709 | 0.944 |
| D21 | 0.645 | 0.930 | 0.225 | 0.733 | 0.326 | 0.712 | 0.723 | 0.803 | 0.707 | 0.784 | **0.049** | 0.312 | 0.847 | 0.960 | 0.803 | 0.969 | 0.487 | 0.801 | 0.370 | 0.619 | 0.948 | 0.954 |
| M3 | 0.678 | 0.930 | 0.671 | 0.827 | 0.474 | 0.743 | 0.231 | 0.593 | 0.492 | 0.656 | 0.478 | 0.786 | 0.434 | 0.928 | 0.681 | 0.935 | 0.484 | 0.801 | 0.913 | 0.989 | 0.922 | 0.954 |
| Naïve Spike B cells | D0 | 0.367 | 0.780 | 0.326 | 0.787 | 0.428 | 0.743 | 0.051 | 0.434 | 0.632 | 0.734 | 0.975 | 0.975 | 0.223 | 0.928 | 0.697 | 0.935 | 0.571 | 0.827 | 0.993 | 0.993 | 0.489 | 0.944 |
| D21 | 0.366 | 0.780 | 0.445 | 0.787 | 0.931 | 0.989 | 0.122 | 0.480 | 0.199 | 0.596 | 0.268 | 0.621 | 0.535 | 0.928 | 0.405 | 0.935 | 0.577 | 0.827 | 0.114 | 0.369 | 0.843 | 0.944 |
| M3 | 0.813 | 0.947 | 0.847 | 0.900 | 0.838 | 0.983 | 0.131 | 0.480 | 0.738 | 0.801 | 0.541 | 0.788 | 0.551 | 0.928 | 0.616 | 0.935 | 0.466 | 0.801 | 0.888 | 0.985 | 0.729 | 0.944 |
| Plasmablasts B cells | D0 | 0.503 | 0.855 | 0.226 | 0.733 | 0.981 | 0.997 | 0.124 | 0.480 | **0.048** | 0.573 | 0.107 | 0.496 | 0.346 | 0.928 | 0.062 | 0.784 | 0.769 | 0.905 | 0.460 | 0.711 | 0.938 | 0.954 |
| D21 | **0.018** | 0.462 | **0.022** | 0.569 | 0.650 | 0.921 | 0.256 | 0.593 | 0.259 | 0.596 | **0.017** | 0.270 | 0.082 | 0.923 | **0.018** | 0.784 | 0.281 | 0.801 | 0.179 | 0.480 | 0.954 | 0.954 |
| M3 | 0.166 | 0.677 | 0.439 | 0.787 | 0.113 | 0.592 | 0.982 | 0.982 | 0.210 | 0.596 | 0.282 | 0.621 | 0.650 | 0.941 | 0.928 | 0.969 | 0.360 | 0.801 | 0.083 | 0.369 | 0.885 | 0.954 |
| Plasmablasts Spike B cells | D0 | 0.332 | 0.780 | 0.389 | 0.787 | 0.137 | 0.592 | 0.391 | 0.665 | 0.393 | 0.607 | **0.002** | 0.081 | 0.591 | 0.939 | 0.604 | 0.935 | 0.154 | 0.801 | 0.738 | 0.947 | **0.045** | 0.944 |
| D21 | 0.954 | 0.956 | 0.527 | 0.809 | 0.325 | 0.712 | 0.239 | 0.593 | 0.319 | 0.603 | 0.883 | 0.938 | 0.114 | 0.923 | 0.531 | 0.935 | 0.318 | 0.801 | 0.102 | 0.369 | 0.210 | 0.944 |
| M3 | 0.404 | 0.824 | 0.399 | 0.787 | 0.352 | 0.718 | 0.577 | 0.768 | 0.823 | 0.856 | 0.659 | 0.839 | 0.319 | 0.928 | 0.191 | 0.935 | 0.680 | 0.878 | 0.838 | 0.950 | 0.285 | 0.944 |
| Spike-specific B cells | D0 | 0.731 | 0.930 | 0.138 | 0.709 | 0.443 | 0.743 | 0.939 | 0.958 | **0.013** | 0.573 | 0.445 | 0.784 | 0.813 | 0.960 | 0.657 | 0.935 | 0.090 | 0.801 | **0.019** | 0.192 | 0.812 | 0.944 |
| D21 | **0.028** | 0.471 | 0.076 | 0.709 | 0.271 | 0.712 | 0.883 | 0.919 | 0.079 | 0.573 | 0.530 | 0.788 | 0.473 | 0.928 | 0.629 | 0.935 | 0.728 | 0.899 | 0.404 | 0.644 | 0.553 | 0.944 |
| M3 | 0.239 | 0.677 | **0.041** | 0.704 | 0.685 | 0.925 | 0.753 | 0.817 | 0.374 | 0.607 | 0.387 | 0.759 | 0.331 | 0.928 | 0.969 | 0.969 | 0.872 | 0.967 | 0.931 | 0.989 | 0.695 | 0.944 |
| Terminal Plasma B cells | D0 | 0.819 | 0.947 | 0.672 | 0.827 | 0.770 | 0.958 | 0.570 | 0.768 | 0.064 | 0.573 | 0.255 | 0.621 | 0.171 | 0.923 | 0.415 | 0.935 | 0.650 | 0.872 | 0.740 | 0.947 | 0.411 | 0.944 |
| D21 | 0.235 | 0.677 | 0.288 | 0.734 | 0.322 | 0.712 | 0.128 | 0.480 | 0.635 | 0.734 | 0.523 | 0.788 | **0.028** | 0.709 | 0.382 | 0.935 | 0.689 | 0.878 | 0.075 | 0.369 | 0.508 | 0.944 |
| M3 | 0.056 | 0.677 | 0.673 | 0.827 | 0.151 | 0.592 | 0.554 | 0.768 | 0.116 | 0.592 | 0.292 | 0.621 | 0.220 | 0.928 | 0.529 | 0.935 | 0.131 | 0.801 | 0.221 | 0.537 | 0.383 | 0.944 |
| Terminal Plasma Spike B cells | D0 | 0.638 | 0.930 | 0.987 | 0.993 | 0.481 | 0.743 | 0.309 | 0.657 | 0.418 | 0.609 | 0.901 | 0.938 | 0.946 | 0.981 | 0.396 | 0.935 | 0.304 | 0.801 | 0.716 | 0.947 | 0.748 | 0.944 |
| D21 | 0.746 | 0.930 | 0.944 | 0.983 | 0.442 | 0.743 | 0.356 | 0.665 | 0.291 | 0.596 | 0.144 | 0.525 | 0.981 | 0.981 | 0.675 | 0.935 | 0.266 | 0.801 | 0.784 | 0.950 | 0.355 | 0.944 |
| M3 | 0.561 | 0.908 | 0.708 | 0.840 | 0.259 | 0.712 | 0.067 | 0.480 | 0.310 | 0.603 | 0.176 | 0.528 | 0.484 | 0.928 | 0.827 | 0.969 | 0.215 | 0.801 | **0.013** | 0.179 | 0.536 | 0.944 |
| Transient B cells | D0 | 0.474 | 0.834 | 0.149 | 0.709 | 0.752 | 0.958 | 0.121 | 0.480 | 0.502 | 0.656 | 0.196 | 0.555 | 0.382 | 0.928 | 0.883 | 0.969 | 0.584 | 0.827 | 0.831 | 0.950 | 0.842 | 0.944 |
| D21 | 0.211 | 0.677 | 0.736 | 0.853 | 0.689 | 0.925 | 0.625 | 0.777 | 0.142 | 0.596 | **0.004** | 0.114 | 0.906 | 0.963 | 0.355 | 0.935 | 0.466 | 0.801 | 0.248 | 0.549 | 0.130 | 0.944 |
| M3 | 0.956 | 0.956 | 0.144 | 0.709 | 0.997 | 0.997 | 0.423 | 0.674 | 0.292 | 0.596 | **0.021** | 0.270 | 0.664 | 0.941 | 0.888 | 0.969 | 0.196 | 0.801 | 0.101 | 0.369 | 0.276 | 0.944 |
| Transient Spike B cells | D0 | 0.598 | 0.924 | 0.490 | 0.806 | 0.615 | 0.921 | 0.272 | 0.603 | 0.859 | 0.859 | 0.461 | 0.784 | 0.721 | 0.943 | 0.288 | 0.935 | 0.866 | 0.967 | 0.326 | 0.594 | 0.746 | 0.944 |
| D21 | 0.124 | 0.677 | 0.562 | 0.809 | **0.049** | 0.592 | 0.712 | 0.803 | 0.203 | 0.596 | **0.047** | 0.312 | 0.156 | 0.923 | 0.915 | 0.969 | 0.313 | 0.801 | 0.986 | 0.993 | 0.598 | 0.944 |
| M3 | 0.142 | 0.677 | 0.444 | 0.787 | 0.968 | 0.997 | 0.683 | 0.803 | 0.257 | 0.596 | 0.689 | 0.839 | 0.181 | 0.923 | 0.487 | 0.935 | 0.161 | 0.801 | **0.001** | 0.063 | 0.531 | 0.944 |
